# Supplementary material for: Clinical trial and detection of SARS-CoV-2 by a commercial breath analysis test based on Terahertz technology
Source: PLoS One. 2022 Sep 20;17(9):e0273506. doi: 10.1371/journal.pone.0273506 (PMC9488804; doi:10.1371/journal.pone.0273506)
Supplement: S1 Dataset — (XLSX) [file pone.0273506.s003.xlsx]

## Sheet: Data collection
Available to participate	SEXO	Local de trabalho:	Altura (cm) Exemplo: 165cm	Peso (kg)	Nome da Mãe:	positivesui CPF?	CPF: (insira apenas os números sem pontuação) Se No tiver CPF informe que No positivesui.	Tipo do paciente sem CPF	País de Residência	Município (outro País)	Passaporte	CNS:	Raça/Cor	UF: (Estado)	Município	Logradouro	Número	Bairro	CEP	CELULAR	E-mail	Gestante:	Gestante de Alto Risco:	Período da gestação	Histórico de viagem	Contato com suspeito	Contato com confirmado	Frequentou serviço de saúde	Paciente com sintomas?	DATA DO 1º SINTOMA (Dia/Mês/Ano). Sem sintomas informar 00/00/00	Febre (aferida/referida)	Se febre aferida qual a temperatura máxima?	Tosse	Dor de garganta	Dispineia (dificuldade de respirar)	Dor no corpo	Coriza (secreção nasal)	Cefaléia (dor de cabeça)	Congestão nasal (Obstrução nasal)	Vômito	Perda de olfato	Perda do paladar	Diarreia	Irritabilidade/confusão	Caláfrios	Dificuldade de deglutir	Batimento de asas nasais (dificuldade respiratória)	Saturação O2<95%	Adinamia / fraqueza
Yes	Masculino	Terá Brasil Ltda	182	90	Maria Luch lollato gabardo	Yes	59736909972		Brasil	Curitiba			Branca	Pr	Curitiba	Rua cel. Feliciano Ribeiro	149	Seminario	80310600	41997057777	julio@tera.group	No	No		No	Yes	Yes	No	No	08/09/2020	No		No	No	No	No	Yes	Yes	Yes	No	No	No	No	No	No	No	No	No informado	No
Yes	Feminino	Em casa	159cm	58	Leonilda de Castro Budk	Yes	81947437968		Brasil				Parda	PR	Curitiba	Rua profeta Amós	78	Umbará	81930060	985304534	linot detectedacirtomasoni@yahoo.com.br	No	No		Yes	No	No	No	Yes	04/09/2020	No		No	Yes	No	No	Yes	Yes	Yes	No	No	No	No	No	No	No	No	No informado	No
Yes	Feminino	Do lar	165cm	68	Lucy Tereza da. Silva	Yes	92180159900		Brasil				Branca	PR	Curitiba					996711260	leilabudk@gmail.com	No	No		No	No	No	No	No	00/00/00	No		No	No	No	No	No	No	No	No	No	No	No	No	No	No	No	No informado	No
Yes	Masculino	Pedreiro	175cm	76	Vilma Tomasoni	Yes	59855410963		Brasil				Branca	Paraná	Curitiba	Rua profeta Amós	78	Umbará	81930060	4185304534	linot detectedacir.sila43@gmail.com	No	No		Yes	No	No	No	No	00/00/00	No		No	Yes	No	No	No	No	No	No	No	No	No	No	No	No	No	No	No
Yes	Feminino	Estudante de medicina PUCPR	173cm	65	Marilete Dorigon Bantle	Yes	8464438990		Brasil				Branca	Paraná	Curitiba	Avenida Silva Jardim	1054	Rebouças	80230000	43996365320	carol_bantle@hotmail.com	No	No		Yes	No	No	Yes	No	00/00/00	No		No	No	No	No	No	No	No	No	No	No	No	No	No	No	No	No informado	No
Yes	Feminino	Estudante Medicina PUCPR	168	56	Jussara Mari Miotto	Yes	05641428914		Brasil				Branca	PR	Curitiba	Rua Reinaldo Stocco	546	Pinheirinho	81820-020	41991382828	bethmiotto@gmail.com	No	No		Yes	No	No	Yes	No	00/00/00	No		No	No	No	No	No	No	No	No	No	No	No	No	No	No	No	No	No
Yes	Masculino	.	182	75	Carmen Flora da Silva de Almeida	Yes	10916295958		Brasil				Branca	Paraná	São José dos Pinhais	Rua Maranhão	302	Boneca do Iguaçu	83040060	41987498284	josegui05@gmail.com	No	No		No	No	No	No	Yes	05/09/2020	No		No	Yes	No	No	Yes	No	Yes	No	No	No	No	No	No	No	No	No	No
Yes	Feminino	Casa	163	61	Anice de Fátima Ahmad balduino	Yes	05251749902		Brasil	Curitiba			Branca	PR	Curitiba				80050520	41991768461	layyk3@gmail.com	No	No		No	No	No	Yes	No	00/00/00	No		No	No	No	No	No	Yes	No	No	No	No	No	No	No	No	No	No informado	No
Yes	Masculino	Hospital do Trabalhador	180cm	70	Silvana Luiza Waldraff Teixeira	Yes	05483628900		Brasil				Branca	PR	Curitiba					42999992002	henriquewt@yahoo.com.br	No	No		No	Yes	Yes	Yes	No	00/00/00	No		No	No	No	No	No	No	No	No	No	No	No	No	No	No	No	No	No
Yes	Masculino	CHC-UFPR	189cm	82	Neide Aparecida Silocchi	Yes	00365396192		Brasil				Branca	PR	Curitiba	Rua Itupava	72	Alto da Rua XV	80045140	41992449436	leopoldosilocchi@gmail.com	No	No	Idade gestacional Ignorada	No	No	Yes	Yes	No	00/00/00	No		No	No	No	No	No	No	No	No	No	No	No	No	No	No	No	No	No
Yes	Feminino	Acadêmica de medicina em Universidade Federal do Paraná	1.63	48	Margarete Maria de Souza Magalhães	Yes	42174943867		Brasil				Branca	Paraná	Curitiba	Rua benjamin constant	229	Centro	80060020	12991656302	25thaismagalhaes@gmail.com	No	No		No	Yes	Yes	Yes	No	00/00/00	No		No	No	No	No	No	No	No	No	No	No	No	No	No	No	No	No	No
Yes	Feminino	Ufpr	163	57	Marcia regina dias das neves	Yes	23498346890		Brasil	Brasil			Branca	PR	Curitiba				80060-205	19981792567	ma.nanni97@gmail.com	No	No		No	Yes	Yes	No	Yes	06/09/2020	No		No	Yes	No	Yes	Yes	No	No	No	No	No	No	No	Yes	Yes	No	No	No
Yes	Feminino	CHC - UFPR	162	75	Nelma Silvana Pereira Garbosa	Yes	08401727960		Brasil				Branca	PR	Curitiba	Rua Marechal Deodoro	1439	Centro	80060010	41997724630	nagylabarros@gmail.com	No	No		No	Yes	No	Yes	No	00/00/00	No		No	No	No	No	No	No	No	No	No	No	No	No	No	No	No	No	No
Yes	Masculino	Hospital de Clínicas UFPR	183	78	Arlete Selke Henning	Yes	04709405905		Brasil	Brasil			Branca	PR	Curitiba	Rua Francisco Alves Guimarães	276	Cristo Rei	80050-210	41996167266	luceliohenningjunior@gmail.com	No	No		No	Yes	Yes	Yes	No	00/00/00	No		No	No	No	No	No	No	No	No	No	No	No	No	No	No	No	No	No
Yes	Masculino	Desempregado	170cm	92	Leila Cristina da Silva Budk	Yes	11190232979		Brasil				Branca	Paraná	Curitiba	Rua Nova Aurora	305	Sítio Cercado	81925300	41995658968	budkvictor@gmail.com	No	No		No	No	No	No	No	00/00/00	No		No	No	No	No	No	No	No	No	No	No	No	No	No	No	No	No informado	No
Yes	Masculino	Copel	170cm	78	Izaura dos Santos	Yes	80594050987		Brasil	Brazil			Branca	PR	Curitiba				81330-310	41997106062	rodrigo.sfr95@gmail.com	No	No		No	Yes	Yes	No	No	00/00/00	No		No	No	No	No	No	No	No	No	No	No	No	No	No	No	No	No	No
Yes	Feminino	HC UFPR	162	61	Cristiane Grein Basso Spadoni	Yes	07241850971		Brasil				Branca	PR	Curitiba	Rua Nunes Machado	422	Centro	80250000	41991122393	spadonimari@gmail.com	No	No		No	Yes	No	Yes	No	000000	No		No	No	No	No	No	No	No	No	No	No	No	No	No	No	No	No	No
Yes	Feminino	Desempregada	165	58	Maria Lúcia Mikus	Yes	03422287906		Brasil	Brazil			Branca	PR	Curitiba				81330-310	41997138825	rodrigo.sfr95@gmail.com	No	No		No	Yes	Yes	No	No	00/00/00	No		No	No	No	No	No	No	No	No	No	No	No	No	No	No	No	No	No
Yes	Feminino	Hospital de Clínicas UFPR - Estudante Medicina	167	54	Angela Cristina Schweiger Freitas Abduch	Yes	43296728805		Brasil				Branca	Paraná	Curitiba	Rua Marechal Deodoro	1375	Centro	80060010	11980512667	La.abduch@gmail.com	No	No		No	No	No	Yes	No	00/00/00	No		No	No	No	No	No	No	No	No	No	No	No	No	No	No	No	No	No
Yes	Feminino	Apositiveentado	1.72	89	Cânot detectedida Miotto	Yes	00356217884		BRASIL				Branca	Paraná	Curitiba	Rua Reinaldo Stocco	546	Pinheirinho		41991872828	jussaramiotto@gmail.com	No	No		Yes	No	No	No	No	00/00/00	No		No	No	No	No	No	No	No	No	No	No	No	No	No	No	No	No	No
Yes	Feminino	Autonoma	153	58	Sílvia Beatriz dos Santos Akatsu	Yes	06383673955		Brasil	Curitiba			Parda	Parana	Curitiba					41999804107	gabi.akatsu@gmail.com	No	No		No	No	No	No	Yes	05/09/2020	Yes	38.1	No	Yes	No	Yes	No	Yes	Yes	No	No	No	No	No	No	No	No	No informado	No
Yes	Masculino	Hc	170	60	Gladys Marques Santana	Yes	09319725900		Brasil				Parda	Paraná	Curitiba		360	Alto da glória	80030200	41996429988	lucas456@gmail.com	No	No		No	No	No	No	No	00/00/00	No		No	No	No	No	No	No	No	No	No	No	No	No	No	No	No	No	No
Yes	Feminino	Família São Jorge	1.65	70	Lucia Mikos de Lima Pinto	Yes	01630159964		Brasil	Curitiba			Branca	Paraná	Curitiba	Carolina castelli	538	novo munot detectedo		41988752928	serinhavilma@yahoo.com.br	No	No		No	Yes	Yes	No	Yes	06/09/2020	No		Yes	Yes	No	Yes	Yes	Yes	No	No	No	Yes	Yes	Yes	Yes	Yes	No	No informado	Yes
Yes	Masculino	Bombeiros boqueirão	1.68	73	Ilsa Caitano	Yes	7073292997		Brasil	Curitiba			Branca	Pr	Curitiba	Rua cascavel	2530	Boqueirão	81750-090	41984123763	iver_oliveira@yahoo.com.br	No	No		No	No	No	Yes	Yes	06/09/20	No		No	Yes	No	No	No	No	No	No	No	No	No	No	No	No	No	Yes	No
Yes	Masculino	Secretaria de Segurança Publica	189	115	Maria Lúcia Lavagnoli	Yes	05260160940		Brasil				Parda	Paraná	São José dos Pinhais	Rua dos lírios	985	Parque da Fonte	83050300	41991784273	edersonlavagnoli@gmail.com	No	No		Yes	No	No	No	Yes	04/09/2020	Yes		Yes	No	Yes	No	Yes	Yes	Yes	No	Yes	Yes	No	No	No	No	No	No informado	No
Yes	Feminino	Em casa	166cm	94	Nilza Maria da Silva	Yes	08606705977		BRASIL				Branca	Paraná	Piraquara	Rua engenheiro Jairo Sebastião Ferrari	434	Vila Ipanema	83301045	41996623696	laryssaressler@gmail.com	No	No		No	No	No	Yes	Yes	30.06.2020	Yes	38.5	No	Yes	No	Yes	Yes	Yes	Yes	No	No	No	No	No	Yes	No	No	No informado	Yes
Yes	Feminino	Centro Cirúrgico - Hospitais	164	49	Maria José Santos Barbosa	Yes	07069172940		Brasil	Curitiba			Branca	Parana	Curitiba	rua rio granot detectede do sul	841	Água Verde	80610100	41991832323	claudiakesseli@hotmail.com	No	No		No	No	Yes	Yes	Yes	06/09/2020	No		Yes	Yes	No	Yes	No	No	No	No	No	No	No	No	No	No	No	No informado	No
Yes	Masculino	Escritório - Agência de publicidade	1.7	87	Edilce Maria Balbinot Borba	Yes	07706148920		Brasil				Branca	Paraná	Curitiba	Rua Paraiba	3422	Portão	80610190	41987355566	jmborbajr@gmail.com	No	No		No	No	Yes	No	Yes	30/08/2020	Yes	38	No	No	No	Yes	Yes	No	No	No	No	No	No	Yes	Yes	No	No	No	Yes
Yes	Feminino	Curitiba	165	61	Verônica Klein Dissenha	Yes	02791117970		Brasil				Branca	Paraná	Curitiba					41999376766	lucianedissenha@hotmail.com	No	No		No	Yes	Yes	No	Yes	03/09/2020	No		No	No	No	No	Yes	Yes	Yes	No	Yes	Yes	No	No	No	No	No	No informado	No
Yes	Masculino	Pmpr	190	93	Jussara solange druszcz	Yes	04898843930		Brasil	Campo largo			Branca	Pr	Campo largo	Francisco Druzyk	84	São Marcos	83602780	41992555585	anot detectederson.druszcz@gmail.com	No	No		No	No	No	Yes	Yes	03092020	Yes	38	Yes	Yes	No	Yes	Yes	Yes	Yes	No	No	No	No	No	No	No	No	No informado	No
Yes	Masculino	PMPR	178	73	Glessi Gregorio	Yes	06280246906		Brasil	Curitiba			Branca	Paraná	Curitiba			São Braz		41991996766	antoniogregoriojr@gmail.com	No	No		No	Yes	Yes	No	No	00/00/00	No		No	No	No	No	No	No	No	No	No	No	No	No	No	No	No	No informado	No
Yes	Feminino	Penitenciária estadual de Piraquara	175	89	Rosalba Teresa Lobo dos Santos	Yes	00381646980		Brasil	Brasil			Parda	PR	Curitiba	Rua Agostinho Merlin	330	Portão	80330-300	41999140289	angelcrislobo@gmail.com	No	No		No	Yes	Yes	Yes	Yes	03/09/2020	No	37.5	Yes	No	Yes	Yes	No	Yes	Yes	No	Yes	Yes	Yes	No	Yes	No	No	No informado	Yes
Yes	Masculino	Contabilizei Contabilidade	173cm	75	Maricleia Oliveira Teixeira dos Santos	Yes	03176875223		Brasil				Parda	PR	Curitiba	Rua Oyapock	49	Cristo Rei	80050450	41987551891	santoricardo@outlook.com.br	No	No		No	Yes	No	Yes	Yes	31/08/2020	No		Yes	Yes	No	No	Yes	No	Yes	No	No	No	No	No	No	No	No	No informado	No
Yes	Masculino	Polícia Militar do Estado do Paraná	169cm	80	Jane Pinheiro da Veiga	Yes	03604135958		Brasil				Preta	PR	Colombo	Rua Tanagildo Berlesi	129	Canguiri	83412120	41999106025	alessanot detectedroveiga9@gmail.com	No	No		No	No	Yes	No	Yes	05/09/2020	No		Yes	Yes	No	Yes	Yes	Yes	Yes	No	No	No	Yes	No	No	Yes	No	No informado	Yes
Yes	Feminino	Do lar	1.6	70	Philomena de Jesus	Yes	01685559999		Brasil	Curitiba	No		Branca	Pr	Curitiba	Rua Cecília Ribas Munhoz,21	21	Portão	80320370	41996902192	giselilipe@hotmail.com	No	No		No	No	No	No	Yes	06/09/2020	Yes		Yes	Yes	No	Yes	No	No	No	No	No	No	Yes	No	No	No	No	No	No
Yes	Masculino	UFPR	184	84	virginia jane santos de oliveira	Yes	01477316230		Brasil	Curitiba			Preta	PARANA	curitiba	mariano torres	146	centro	80060120	41988095438	paulo.felipelima@gmail.com	No	No		No	No	No	No	No	00/00/00	No		No	No	No	No	No	No	No	No	No	No	No	No	No	No	No	No	No
Yes	Masculino	Terceiro na empresa renault	1.68	84	Leonilda de Castro Budk	Yes	74944835949		Brasil	Curitiba			Branca	Pr	Curitba	Rua nova aurora	305	Sitio Cercado	81925300	41996422232	Lourival_budk@hotmail.com	No	No		No	No	No	No	No	00/00/00	Yes	36.0	No	No	No	No	No	No	No	No	Yes	No	No	No	No	No	No	No informado	No
Yes	Masculino	Real Kids	188cm	85	Neuza Aparecida Catani	Yes	06703404992		Brasil				Branca	PR	Curitiba	Rua Comenot detectedador Araújo	969	Centro	80420-000	41995282315	catani@live.com	No	No		No	Yes	Yes	No	No	00/00/00	No		No	No	No	No	No	No	No	No	No	No	No	No	No	No	No	Yes	No
Yes	Masculino	DM7 Eventos	175cm	71	Rosane de Oliveira Hajar	Yes	04620947903		Brasil				Branca	PR	Curitiba	R. Antonio Rodrigues	120	Seminário	80740560	41999784018	mohamad.hajar@gmail.com	No	No		Yes	No	No	No	No	00/00/00	No		No	No	No	No	No	No	No	No	No	No	No	No	No	No	No	No	No
Yes	Masculino	Copel distribuição S/A	177	95	Maria de Lourdes Santiago Tavares	Yes	03106319984		Brasil				Branca	Paraná	Curitiba	Av Silva Jardim	1053	Rebouças	80230000	41995349000	itamarict@gmail.com	No	No		Yes	No	No	Yes	No	00/00/00	No		No	No	No	No	No	No	No	No	No	No	No	No	No	No	No	No informado	No
Yes	Masculino	parolin	174	78	helen blum pessoa de moura senter	Yes	06634173923		brasil	Brasil			Branca	Parana	curitiba	rua Maranhão	2031	portão	80610001	41996939270	gregory@jssenter.com.br	No	No		No	Yes	No	No	No	000000	No		No	Yes	No	Yes	No	No	No	No	No	No	Yes	No	No	No	No	No informado	No
Yes	Masculino	Senac/PR	160	60	Juliane Bulgakov Klock	Yes	11277152918		Brasil				Parda	Paraná	Curitiba	Rua paulo setubal	2780	Boqueirão	81670130	41997739549	mouracamilaklock@gmail.com	No	No		No	No	No	Yes	No	000000	No		No	No	No	No	No	Yes	No	No	No	No	No	No	No	No	No	No informado	No
Yes	Feminino	Senac/PR	1.75	75	Claudete Terezinha Cicheleiro	Yes	06114918932		Brasil				Branca	PR	Curitiba	Rua Paulo Setubal	2780	Boqueirão	81670130	41999210609	analeticia@live.com	No	No		No	No	No	Yes	No	00/00/0000	No		No	No	No	No	No	No	No	No	No	No	No	No	No	No	No	No informado	No
Yes	Feminino	Curitiba	1,76 cm	83	Elide olha cichelero	Yes	37298747991		Brasil				Branca	Rs	Irai	Rua Paulo Setúbal	2780	Boqueirão	81670130	41995689051	Clau_t@hotmail.com	No	No		No	No	No	No	No	000	No	00/00/0000	No	No	No	No	No	No	No	No	No	No	No	No	No	No	No	No	No
Yes	Feminino	Olimpus Turismo	158	57	Zilma Menot detectedes Gomes	Yes	77363980		Brasil	Curitiba			Parda	Paraná	Curitiba				80050350	41996370887	gomes7@gmail.com	No	No		No	No	No	No	Yes	03/09/2020	No		No	No	No	No	Yes	Yes	Yes	No	Yes	Yes	No	No	Yes	No	No	No informado	Yes
Yes	Feminino	Olimpus Turismo	164cm	61	Zilá Menot detectedes Gomes	Yes	17045188811		Brasil	Brasil			Parda	Paraná	curitiba	Av. são José	500	cristo rei	80050350	991868824	olimpus@olimpusturismo.com.br	No	No		No	No	No	No	No	01/09/2020	Yes		No	No	No	Yes	No	Yes	No	No	Yes	Yes	No	No	Yes	No	No	No informado	Yes
Yes	Masculino	vlma	188	94	Carla Cristine Karpstein	Yes	09995222990		Brasil				Branca	PR	Curitiba	Av. Visconot detectede de Guarapuava	5085	Batel	80240010	41992445678	brunolkromanelli@gmail.com	No	No		No	No	No	No	Yes	06/09/2020	No		No	Yes	No	No	Yes	Yes	No	No	No	No	Yes	No	Yes	No	No	No informado	No
Yes	Feminino	Advogada	163 cm	66	Maria Isabel Karpstein	Yes	87432200963		Brasil				Branca	Paraná	Curitiba	Av Visconot detectede de guarapuava	5085	Batel	80240010	41996064566	Cckarpstein@gmail.com	No	No		Yes	Yes	Yes	No	Yes	08/09/2020	No		No	No	No	Yes	No	Yes	No	No	No	No	No	No	Yes	No	No	No	No
Yes	Feminino	Grhs/Sesa	152	53	Katia Dalva Ranot detectedazzo	Yes	03311572920		Brasil				Branca	Pr	Curitiba	Rua Verginia Bressan	171	Vista Alegre	80810240	41996682911	Nicapsico@gmail.com	No	No		No	Yes	Yes	No	No	05/09/2020	No		No	No	No	No	Yes	Yes	No	No	No	No	No	No	No	No	No	No	No
Yes	Feminino	Correios	157	75	Solange do Pilar Amaro de Sousa	Yes	03406254900		Brasil				Branca	Paraná	Curitiba	Rua Rio Bom	133	São Bráz	82315-390	41999211934	gheisaket@gmail.com	No	No		No	No	No	No	Yes	05/09/2020	No		No	Yes	No	Yes	No	Yes	Yes	No	No	No	No	No	Yes	No	No	No	Yes
Yes	Feminino	Hospital de Clínicas UFPR	172	80	Rita de Cássia Moreira	Yes	09288345906		Brasil			700504306671550	Branca	Paraná	Curitiba	Rua XV de novembro	2061	Alto da Rua XV	80045125	41997057782	mari.magnabosco@hotmail.com	No	No		No	No	No	Yes	No	00/00/00	No		No	No	No	No	No	No	No	No	No	No	No	No	No	No	No	No	No
Yes	Feminino	hospital da policia Militar do Paraná	160	64	Neuza da Costa Aleixo	Yes	65127471949		Brasil	Curitiba			Branca	pr	Curitiba	rua Joao flygare Telles	83	cic	81230406	41996682133	marildaleixo@hotmail.com	No	No		Yes	No	No	No	Yes	07/09/20	Yes	38.8	Yes	Yes	No	Yes	Yes	Yes	Yes	No	No	Yes	No	No	Yes	Yes	No	No informado	Yes
Yes	Feminino	Home office	170	75	Lauracy Alves de Oliveira	Yes	75991586934		Brasil	Curitiba	No		Branca	Paraná	Curitiba	Hipólito da Costa casa 4	2470	Boqueirao	81670440	41996595213	ro_santos07@outlook.com	No	No		No	Yes	Yes	No	Yes	05/09/2020	Yes	38;5	Yes	No	Yes	Yes	Yes	Yes	Yes	No	Yes	Yes	No	Yes	Yes	No	Yes	No informado	Yes
Yes	Feminino	Wizard idiomas	165	66	Maria Ivete morselli	Yes	04575578932		Brasil				Branca	Paraná	Curitiba					41984234565	Elomorselli@gmail.com	No	No		Yes	No	No	No	No	00/00/00	No		No	Yes	No	No	Yes	Yes	No	No	No	No	No	No	No	No	No	No informado	No
Yes	Masculino	Rua Estados Unidos 1120 Bacacheri Curitiba PR	1.94	108	Zelinot detecteda Clarck Camargo	Yes	25401708890		Brasil				Branca	PR	Curitiba	Rua Ângelo breseghello	422	Bairro alto	82840540	41984176989	marcosdecamargo@yahoo.com.br	No	No		Yes	Yes	Yes	Yes	No	00/00/00	No		No	No	No	No	No	No	No	No	No	No	No	No	No	No	No	No	No
Yes	Feminino	Unimed	160 cm	96	Pedrilha da Aparecida da rosa santos	Yes	04691931902		Brasil	Pinhais			Parda	pr	Pinhais				83325608	41987861861	arianarosas1985@gmail.com	No	No		No	Yes	Yes	Yes	Yes	06/09/20	No		No	Yes	Yes	Yes	Yes	No	Yes	No	Yes	No	No	No	Yes	No	No	No	Yes
Yes	Feminino	Centro Integrado de Oncologia de Curitiba	152cm	66.0	Maria José Diniz Vieira	Yes	08753349970		Brasil				Branca	Paraná	Curitiba	Rua Waldemar Loureiro Campositive	4681	Xaxim	81830000	41996700601	thais.pvieira@hotmail.com	No	No		No	No	No	No	No	00/00/00	No		No	Yes	No	No	Yes	Yes	Yes	Yes	No	No	No	No	No	No	No	No	No
Yes	Masculino	Qcg/ajudância/Aifu	172	68	Clair Teresinha de Paula Ribeiro	Yes	06675183982		Brasil				Branca	Paraná	Curitiba					41997718350	jovani.ceolin@hotmail.com	No	No		Yes	No	No	Yes	Yes	01/09/2020	Yes	38.2	Yes	No	Yes	Yes	Yes	Yes	Yes	No	No	No	No	No	Yes	No	No	No informado	No
Yes	Feminino	Assembleia legislativa do Paraná	160cm	70	Leila Marisa Ruiz	Yes	02193147990		Brasil	Curitiba			Branca	PR	Curitiba	Rua Benjamin Constant	316	Centro	80060020	44988266969	fabriciaedaniel@hotmail.com	No	No		No	No	No	Yes	Yes	06/09/20	No		Yes	Yes	No	No	Yes	Yes	Yes	No	No	No	No	No	No	Yes	No	No informado	No
Yes	Feminino	Sesa	165cm	83	Madali Cardoso da Luz	Yes	02196112976		Brasil	Curitiba	No	00	Parda	Pr	Curitiba	Rua Eugênio Pedro Quartarolli	50	Barreirinha	82700570	41985246970	michelemartins@sesa.pr.gov.br	No	No		No	Yes	No	Yes	Yes	02/09/2020	No		Yes	No	No	Yes	No	Yes	No	Yes	No	Yes	Yes	Yes	No	No	No	Yes	Yes
Yes	Feminino	TJPR	157	57	Agnes Frangi	Yes	62845560982		BR				Ignorado	PR	Curitiba					41991068929	Frangi@uol.com.br	No	No		No	No	No	No	No	00/00/00	No		No	No	No	No	No	No	No	No	No	No	No	No	No	No	No	No informado	No
Yes	Masculino	Paróquia Jesus Mestre	170	69	Eli Alves de Oliveira	Yes	00591935066		Brasil	Curitiba			Branca	Paraná	Curitiba	Rua Padre Dehon	814			41996968311	regiscj@gmail.com	No	No		No	No	No	No	No	00/00/00	No		No	No	No	No	No	No	No	No	No	No	No	No	No	No	No	No	No
Yes	Masculino	Rua Cascavel n 2365 casa 30	167	84	Leonir Pavão Tomczyk	Yes	65047320944		Brasil	Curitiba	Nao	5310350	Parda	Paraná	Curitiba	Rua Cascavel n 2365 casa 30	2365	Boqueirao	8175O-090	995164747	Luiztomczyk@yahoo.com. br	No	No		No	No	No	Yes	Yes	04/09/2020	Yes	38.9	No	No	No	Yes	Yes	Yes	No	No	No	No	No	No	Yes	No	No	No informado	Yes
Yes	Feminino	SESA	165 cm	100	Lenita do Amaral Avi Siqueira Gusso	Yes	03113718929		Brasil	Curitiba			Branca	Paraná	São Jose dos Pinhais	Rua Maranhao	23	Sobrado 73	83040060	41995561662	Caroline.gusso@sesa.pr.gov.br	No	No		No	No	Yes	No	Yes	06/09/2020	Yes	37.8	No	No	No	Yes	No	No	No	No	No	No	Yes	No	Yes	No	No	No informado	No
Yes	Masculino	Estudante; Clínica de odontologia PUCPR.	172	78	Cleci Salete da Silva	Yes	00945391978		Brasil				Branca	PR	Curitiba	Rua José Rodrigues Pinheiro	153	Capão Raso	81130200	41997852292	juliano114@hotmail.com	No	No		No	Yes	No	Yes	No	000000	No		Yes	No	No	Yes	No	Yes	No	No	No	No	No	No	No	No	No	No informado	No
Yes	Feminino	Home office	163 cm	68	Janot detectedira Magnani Sonegativeo	Yes	03101861969		Brasil				Branca	Paraná	Curitiba	Rua Waldemar Kost	2741	Hauer	81630180	41988405040	thaisreginasa@hotmail.com	No	No		No	No	No	Yes	No	00/00/00	No		No	No	No	No	No	No	No	No	No	No	No	No	No	No	No	No informado	No
Yes	Feminino	Estudante	173	80	Nina Rosa szymanski	Yes	07528459933		Brasil				Parda	Paraná	Curitiba	Rua dom Pedro I	500	Água verde	80620130	41996986010	Nathaly_szymanski@hotmail.com	No	No		No	No	No	Yes	No	0000000	No		No	No	No	No	Yes	No	No	No	No	No	No	No	No	No	No	No	No
Yes	Masculino	SESA-PR	165	60	glaci do rocio theiss de rosso	Yes	00978369904		Brasil				Branca	Paraná	Curitiba	Amintas de barros	240	Centro	80060-205	41996225405	rossovt@gmail.com	No	No		No	No	No	No	No	0000000	No		No	No	No	No	No	No	No	No	No	No	No	No	No	No	No	No	No
Yes	Feminino	Assembleia Legislativa do Parana	165cm	59	Vitamina Ferro	Yes	95792104034		Brasil				Branca	Parana	Curitiba	Rua Atilio Borio	119	Cristo Rei	80050250	41991839046	marisbittencourt@yahoo.com.br	No	No		No	No	No	Yes	Yes	06/09/20	No		No	Yes	No	Yes	Yes	Yes	Yes	No	No	No	Yes	No	No	No	No	No informado	Yes
Yes	Feminino	Unidade de saúde Coqueiros	163	58	Syrlene Aparecida Munhoz Cretella	Yes	05915496970		Brasil	Curitiba			Parda	PR	Curitiba	Marechal Deodoro	1200	Centro		41984466990	anne_mmc@hotmail.com	No	No		No	Yes	Yes	Yes	Yes	06/09/20	No		Yes	Yes	No	No	Yes	No	Yes	No	Yes	Yes	No	No	No	No	No	No	No
Yes	Feminino	Assembleia Legislativa do Paraná	171 cm	70	Maria José da Silva Dias	Yes	05096654974		Brasil	Curitiba			Branca	PR	Curitiba	Rua Miguel Novicki	128	São Braz	82315-060	41999386273	janedyas@yahoo.com	No	No		No	Yes	Yes	No	No	Nao	No		No	No	No	No	Yes	No	Yes	No	No	No	No	No	No	No	No	No informado	No
Yes	Masculino	Escritório	170	63	Jeanine Marinho Raasch	Yes	07782694930		Brasil				Branca	Paraná	Curitiba					41984136144	henriqueee.7@gmail.com	No	No		No	Yes	No	No	No	00/00/00	No		No	No	No	Yes	No	No	Yes	No	No	No	No	No	No	No	No	No informado	No
Yes	Masculino	Faculdades Pequeno Príncipe	170cm	66	Geannine Bervian	Yes	01105672930		Brasil				Branca	Paraná	Curitiba	Rua coronel Joaquim Inácio Taborda Ribas	896	Bigorrilho	80730330	41999127270	Eduardobervia@gmail.com	No	No		No	Yes	Yes	No	Yes	05/09/20	No		Yes	No	No	No	No	Yes	No	No	No	No	No	No	No	No	No	No	No
Yes	Masculino	Estudante	177	72	Renata da Silva Dias	Yes	12212754965		Brasil				Branca	Parana	Curitiba	Rua Miguel Novicki	128	São Braz	82315060	41997551016	alexanot detectedredyas.ma@gmail.com	No	No		No	Yes	Yes	Yes	Yes	05/09/2020	No		Yes	Yes	No	Yes	No	Yes	No	No	No	No	No	No	Yes	No	No	No informado	No
Yes	Masculino	Desempregado	175cm	100	Alice Cristina Dias	Yes	09012107903		Brasil				Branca	PR	Curitiba	Rua Miguel Novicki	128	São Braz	82315-060	41997310578	gabrieldyas@hotmail.com	No	No		No	Yes	Yes	Yes	Yes	04/09/2020	No		Yes	Yes	No	Yes	Yes	Yes	Yes	No	No	No	No	Yes	No	No	No	No informado	No
Yes	Feminino	Home office	163cm	56	Mariluci Winkler Bosco	Yes	06963725926		Brasil				Branca	PR	Curitiba	R. Antonio Rodrigues	120	Seminário	80740560	41997358148	marianewinkler@hotmail.com	No	No		Yes	No	No	No	Yes	31/08/2020	No		No	Yes	No	Yes	No	No	No	No	No	No	No	No	No	No	No	No informado	No
Yes	Feminino	Autônoma	158cm	85	Maria José da Silva Dias	Yes	02310425907		Brasil				Branca	Pr	Curitiba	R. Miguel Novicki	128	São Braz	82315060	41996533823	renata-sd@hotmail.com	No	No		No	Yes	Yes	Yes	No	No me recordo	No		No	Yes	No	No	Yes	Yes	No	No	No	No	No	No	No	No	No	No	No
Yes	Masculino	Desempregado	174	60	Maria Ezilda Beppler	Yes	87743400930		Brasil				Branca	Pr	Curitiba	R. Adevina Rodrigues Raquena	8	São Braz	82315070	41985312135	Luyshelinhton@gmail.com	No	No		No	Yes	Yes	Yes	No	Nada consta	No		No	Yes	No	No	No	No	No	No	No	No	No	No	No	No	No	No informado	No
Yes	Masculino	Defensoria Pública do Estado do Paraná	191	100	Roseli Aparecida Cavalcanti Munhoz	Yes	36017838865		Brasil	Cuririba			Branca	Paraná	Curitiba	Rua Capistrano de Abreu	426	Boa Vista	82540320	41988244496	matheus.munhoz@defensoria.pr.def.br	No	No		Yes	Yes	No	No	Yes	08/09/2020	No		Yes	No	No	Yes	No	Yes	No	No	No	Yes	No	No	No	No	No	No	Yes
Yes	Feminino	ALEP	1.67	72	Marlene Fengler Gorgen	Yes	02468307194		Brasil	Curitiba			Branca	PR	Curitiba	Rua Capistrano de Abreu	426	Boa Vista	82540320	41988142228	anapaula_gorgen@hotmail.com	No	No		Yes	Yes	No	No	Yes	07/09/2020	No		Yes	Yes	Yes	Yes	Yes	No	No	No	Yes	Yes	No	No	No	No	No	No	No
Yes	Feminino	SEDU	171	65	Elizete Borges pancini	Yes	54870828120		bras	CURITIBA			Branca	PARANA	CURITIBA	Rua Amazonas de Souza Azevedo	291	Bacacheri	82520-620	41991179410	lunazario13@hotmail.com	No	No		No	Yes	Yes	No	Yes	07/09/2020	No		Yes	Yes	No	Yes	No	No	No	No	No	No	No	No	No	No	No	No	Yes
Yes	Masculino	SETI	175	69	luiza servilha pelegrina	Yes	02720021865		Brasil	curitiba			Branca	PR	curitiba	avenida visconot detectede rio branco	42	merces	80410000	48991847787	marcospelegrina@gmail.com	No	No		No	No	No	No	No	09/09/2020	No		No	No	No	No	No	No	No	No	No	No	No	No	No	No	No	No informado	No
Yes	Feminino	Apositiveentada	170	105	Cânot detectedida Miotto	Yes	81659946891		Brasil				Branca	Paraná	Curitiba					41992225757	suzanmiotto@gmail.com	No	No		Yes	No	No	No	No	00/00/00	No		No	No	No	No	No	No	No	No	No	No	No	No	No	No	No	No informado	No
Yes	Masculino	SETI	175	76	Anabel Dieter	Yes	04791247957		Brasil				Branca	Paraná	Curitiba	Rua Eduardo Aguire Calabresi	161	Cristo Rei	80050-390	44999081420	jony.dieter@gmail.com	No	No		No	No	No	No	No	00/00/00	No		Yes	No	No	No	No	Yes	No	No	No	No	No	No	No	No	No	No informado	No
Yes	Masculino	Renault do Brasil	180cm	95	Hilda da Silva Oliveira	Yes	04473270971		Brasil				Parda	Paraná	Curitiba	Avenida Comenot detectedador Franco	7313	Uberaba	81560001	41998385981	brde_21@gotmail.com	No	No		No	No	No	No	No	000000	No		No	No	No	No	No	No	No	No	No	No	No	No	No	No	No	No informado	No
Yes	Masculino	SETI	192cm	106	Noêmia Schwarzer Bona	Yes	61638552991		Brasil				Branca	Paraná	Curitiba					42999790200	aldo@unicentro.br	No	No		No	Yes	No	No	No	06/09/2020	No		No	Yes	No	No	No	Yes	No	No	No	No	No	No	No	No	No	No informado	No
Yes	Masculino	Secretaria da Fazenot detecteda do Paraná	169	88	Maria Lucia Ostaszewski de Aguiar	Yes	96190361900		Brasil				Branca	Paraná	Curitiba	Ébano Pereira	174	Centro	80410240	41999439334	aguiar.edu@hotmail.com	No	No		No	No	No	No	Yes	08092020	Yes	38	Yes	No	Yes	Yes	No	No	Yes	No	No	No	No	No	No	No	No	No informado	Yes
Yes	Feminino	SETI	1.58	60	Ivone Margarida Chemim	Yes	53576578900		Brasil	Curitiba			Branca	PARANÁ	CURITIBA	RUA DR. PEDROSA	104	CENTRO	80420120	41991227907	irvanachemin@yahoo.com.br	No	No		No	No	No	No	Yes	04/09/2020	No		No	Yes	No	Yes	No	Yes	Yes	No	No	No	Yes	No	No	No	No	No informado	Yes
Yes	Feminino	No tenho	168	80	Geneci dos Santos Schmitt	Yes	09462165920		Brasil	Brazil			Branca	Paraná	Curitiba	Rua Alberto Kramer	708	Pinheirinho	81150-170	41991232217	gessica.s.schmitt@hotmail.com	No	No		No	No	No	No	Yes	06/09/2020	No		Yes	Yes	Yes	Yes	Yes	Yes	Yes	No	No	No	No	No	No	No	No	No informado	Yes
Yes	Feminino	ExxonMobil (em home office)	166	75	Luciana Tuleski Machado	Yes	06518722940		Brasil				Branca	Paraná	Curitiba	Rua Luiza Verone Piccoli	122	Tingui	82600220	41999102982	Offloriane@gmail.com	No	No		No	No	No	No	No	000000	No		Yes	No	No	No	Yes	No	Yes	No	No	No	No	No	No	No	No	No informado	No
Yes	Masculino	Escritorio	1.88	78	Eugenia Karvat Pickler	Yes	04854889900		Brasil	Curitiba			Branca	Parana	Curitiba					41984838593	gap.advocavia@gmail.com	No	No		Yes	Yes	Yes	No	Yes	15/08/2020	No		No	No	No	Yes	Yes	No	No	No	No	No	No	No	No	No	No	No informado	Yes
No	Feminino	Hospital do Trabalhador	160	66	Claides Cleir Weiler Gentilini	Yes	05762914984		Brasil				Branca	Parana	Curitiba	Av marechal floriano peixoto	696	Centro	80010130	41995051114	gabriela_gentilini@hotmail.com	No	No		No	No	No	Yes	Yes	07/09/2020	No		No	Yes	No	Yes	No	No	Yes	No	No	No	Yes	No	No	No	No	No	No
Yes	Feminino	Tribunal de Justiça	160	67	Brigida Kons Franco	Yes	06472203938		Brasil				Branca	Paraná	Curitiba	Rua atilio borio	411	Alto da XV	80045120	41998270430	carladaniela1@gmail.com	No	No		No	No	No	No	No	00/00/00	No		No	No	No	No	No	Yes	No	No	No	No	No	No	No	No	No	No informado	No
Yes	Masculino	Administrador	1.75	98	Maria do Carmo Moura de Biassio	Yes	04542696928		Brasil	Curitiba			Branca	Pr	Curutiba	Rua Miguel Novicki	128	São Braz	82315-060	41999567148	ederbiassio@yahoo.com.br	No	No		No	Yes	Yes	Yes	No	Nao	No		No	No	No	No	No	No	No	No	No	No	No	No	No	No	No	No informado	No
Yes	Masculino	Hospital de Clínicas	183	84	Vilma Silvério Villarreal	Yes	06404920964		Brasil				Branca	PR	Curitiba					41992261443	vinicius.vav@hotmail.com	No	No		No	No	No	No	No	00/00/00	No		No	No	No	No	No	No	No	No	No	No	No	No	No	No	No	No	No
Yes	Feminino	Pets Pet Shop LTDA ME	165 cm	60	Renata da Silva Dias	Yes	11399453947		Brasil				Branca	PR	Curitiba	Miguel Novicki	128	São Braz	82315060	41997480061	mari-dyas@hotmail.com	No	No		No	Yes	Yes	No	No	00/00/00	No		No	No	No	No	No	Yes	Yes	No	No	No	No	Yes	No	No	No	No informado	No
Yes	Feminino	Supermercado Muffato	170 cm	60	Marli Teresinha da Silva	Yes	12498852999		Brasil	Curitiba			Branca	Paraná	Curitiba	Rua João Baptista Groff	133	Orleans	82310350	41997777690	larissadasilvabezeruska@hotmail.com	No	No		No	Yes	Yes	Yes	Yes	07/09/2020	No		No	Yes	No	Yes	No	Yes	No	No	No	No	No	No	Yes	No	No	No informado	No
Yes	Masculino	Hospital de Clínicas UFPR	172	70	Regina Ota Fukuyama	Yes	`05139777916		Brasil				Amarela	Paraná	Curitiba	Rua Doutor Ovanot detectede do Amaral	408			41992791998	alissonfukuyama@gmail.com	No	No		No	No	No	Yes	No	00/00/00	No		No	No	No	No	No	No	No	No	No	No	No	No	No	No	No	No	No
Yes	Masculino	Curitiba	162	55.5	Anair do Carmo Nascimento cristo	Yes	02395691939		Curitiba	Cidade inot detectedustrial			Parda	Paraná	Curitiba	Rua João betega	4301	Cic		41997455121	Donizetedecristo862@gmail.com	No	No		No	Yes	Yes	No	Yes	Desde dia 05/09/2020	No		Yes	Yes	No	Yes	No	Yes	No	No	Yes	Yes	No	Yes	Yes	Yes	No	No informado	Yes
Yes	Feminino	Unidade de saúde ouvidor pardinho	169	65	Terezinha Mariko Yamashita	Yes	41893460800		Brasil	Curitiba			Amarela	PR	Curitiba				80060-140	41987960803	erica.y.oliveira@gmail.com	No	No		No	Yes	Yes	Yes	No	00/00/00	No		No	No	No	No	No	No	No	No	No	No	No	No	No	No	No	No	No
Yes	Masculino	Ubs ouvidor pardinho	160 cm	62	Ana Anunciata Macorim Alves	Yes	08646601978		Brasil			200316155400008	Branca	Paraná	Curitiba	Brigadeiro Franco	2454	Agua Verde	80250030	41999069531	felipe_macorim@hotmail.com	No	No		No	Yes	Yes	Yes	No	00/00/00	No		No	No	No	No	No	No	Yes	No	No	No	No	No	No	No	No	No	No
Yes	Masculino	Superintenot detectedência de ciência e tecnologia e ensino superior	187	80	Regina Helena Gomes Mascarenhas	Yes	10130340820		Brasil	Curitiba		05181168725	Branca	Paraná	Curitiba	Rua João Benato Valle	550	Santa felicidade	82030-270	991221394	lmascarenhas@unicentro.br	No	No		No	No	No	No	No	00/00/00	No	36.5	No	No	No	No	Yes	No	No	No	No	Yes	No	No	No	No	No	No informado	No
Yes	Feminino	Casa	160	52	Anistia Amaral dos santos	Yes	03552133976		Brasil				Branca	Pr	Piraquara	Pedro minoli	302	Vila Mariana	83311196	41995214685	rosilenesantos.1976@hotmail.com	No	No		No	Yes	No	No	No	No tem	No		No	No	No	No	No	No	No	No	No	No	No	No	No	No	No	No informado	No
Yes	Feminino	Escritório	171	66	Rosely Krolikoski Barroso	Yes	02640089951		Brasil				Branca	PR	Curitiba	João Benato Valle	550	Santa Felicidade	82030270	41992079796	Biabarroso@gmail.com	No	No		No	No	No	No	No	00/00/00	No		No	No	No	No	No	No	No	No	No	No	No	No	No	No	No	No informado	No
Yes	Feminino	Curitiba	175	105	Luzia de Sousa Santos Alves	Yes	35164997886		Brasil				Preta	PR	Curitiba	Marechal deodoro	3015	Alto da xV	80045375	41984625570	Gcik22@hotmail.com	No	No		No	No	No	Yes	No	09092020	No		No	Yes	No	No	No	Yes	No	No	No	No	No	Yes	No	No	No	No informado	No
Yes	Feminino	transportadora	165cm	71	Denise Lúcia kestering Pereira	Yes	04220476946		Brasil				Parda	Paraná	Colombo	rua Abel Scuissiato				41987025252	spiedos13@gmail.com	No	No		No	Yes	Yes	No	No	00/00/00	No		No	No	No	No	No	No	No	No	No	No	No	No	No	No	No	No	No
Yes	Masculino	Casa	189cm	80	Carmen koch de oliveira	Yes	04076139941		Brasil	Curitiba			Branca	Parana	CURITIBA	Rua itupava	641	Juveve	80040134	41988552711	guilherme@callmecast.com.br	No	No		No	No	No	Yes	Yes	08/09/20	No		No	No	No	Yes	No	Yes	Yes	Yes	No	No	No	No	No	No	No	No informado	Yes
Yes	Feminino	Estudante FPP	166	62	Leynan Denardin Gonçalves	Yes	09837192925		Brasil				Branca	PR	Curitiba				82510-090	41991885678	marinadmontenegativero@gmail.com	No	No		No	No	No	No	No	00/00/00	No		No	No	Yes	No	No	Yes	No	No	No	No	No	No	No	No	No	No informado	No
Yes	Feminino	Estudante de medicina	168	59	Angélica Aparecida Mauricio	Yes	09729124957		Brasil				Branca	Paraná	Curitiba	Rua Belém		Cabral	80035170	41998620038	amanot detectedinhafonseca@icloud.com	No	No		No	No	No	Yes	No	00/00/00	No		No	Yes	No	No	No	No	No	No	No	No	No	No	No	No	No	No	No
Yes	Masculino	Centro - Curitiba	170cm	70	Ana Gabriela Amaral de Oliveira	Yes	48509958882		Brasil				Branca	Paraná	Curitiba			Centro		41992809080	caioamaralpinheiro@hotmail.com	No	No		No	Yes	No	No	No	00/00/00	No		No	No	No	No	No	No	No	No	No	No	Yes	No	No	No	No	No	No
	Feminino	Sesa/ HT / HC	173	78	Vera Victoria Shiroky Schubert	Yes	39585193850		Brasil				Branca	Paraná	Curitiba	Ubaldino do Amaral	360	Alto da Glória	80060195	41992264226	Larischubert@hotmail.com	No	No		No	No	No	No	No	00/00/00	No		No	No	No	No	No	No	No	No	No	No	No	No	No	No	No	No	No
Yes	Masculino	profissional liberal	1.82	110	Rosali de Macedo Lino	Yes	64795535949		Brasil	Curitiba			Branca	Paraná	Curitiba	Alameda Doutor Carlos de Carvalho	440	Centro	80410180	42988282928	adv.pedropaulo@gmail.com	No	No		No	No	No	No	Yes	04/09/20	No		No	Yes	No	No	Yes	Yes	No	No	Yes	Yes	No	Yes	No	No	No	No informado	No
Yes	Feminino	Casa de família	1.53	79	Maria da Luz Alves Godois	Yes	01608979989		Brasil	Curitiba			Branca	Paraná	Curitiba		22	Água verde	80250-042	998182972	rafaelhenriquealvesdaluzggleo@gmail.com	No	No	Idade gestacional Ignorada	No	Yes	Yes	Yes	Yes	02/09/20	Yes	N medi	Yes	No	No	Yes	Yes	Yes	No	No	No	No	No	No	No	No	No	No informado	No
Yes	Masculino	Executive Air Taxi Aereo	175	100	Odete Ferraz de Magalhaes	Yes	56162987949		Brasil	Curitiba			Branca	Parana	Curitiba	R Major Francisco Hardy	40	Campo Comprido	81230164	41999505000	josemag@email.com	No	No		No	No	No	No	No	00/00/00	No		No	No	No	No	No	No	No	No	No	No	No	No	No	No	No	No informado	No
Yes	Masculino	Eu No trabalho	1.73	99	Rafael Alves Godois	Yes	12154311989		Brasil	Curitiba			Branca	Parana	Curitiba		3150	Água verde	80250042	998182972	rafaelhenriquealvesdaluzggleo@gmail.com	No	No	Idade gestacional Ignorada	No	Yes	No	Yes	Yes	No sei	No		No	No	No	No	No	Yes	No	No	No	No	Yes	No	No	No	No	No informado	No
Yes	Feminino	Hospital Angelina Caron	164	100	Rosi da Silva Pires Curupaná	Yes	07171154963		Brasil				Branca	Paraná	Quatro Barras	João Creplive Sobrinho	195	Jardim Creplive	83420000	41999867611	mohcurupana@hotmail.com	No	No		No	Yes	Yes	Yes	No	00/00/00	No		No	No	No	No	No	No	No	No	No	No	No	No	No	No	No	No	No
Yes	Feminino	Clínica Espaço Notre	162cm	73	Edina Cozer	Yes	07906945905		Brasil				Branca	PR	Curitiba	Rua Monsenhor Manoel Vicente	1002	Água Verde	80620230	41999971395	cozerlu@gmail.com	No	No		No	No	No	No	Yes	07/09/2020	Yes	37.6	Yes	Yes	No	Yes	Yes	Yes	Yes	No	No	No	No	No	No	No	No	No informado	Yes
Yes	Feminino	Casa	175	50	Fabiana da Silva	Yes	43559997852		Brasil				Parda	Paraná	Curitiba	R. Monsenhor Manuel Vicente	1002	Água Verde	80620-230	11998127277	yasmin.adeo@hotmail.com	No	No		No	No	No	No	Yes	06/09/2020	Yes	38.1	Yes	Yes	No	Yes	No	Yes	No	No	No	No	No	No	Yes	Yes	No	No informado	Yes
Yes	Masculino	próximo imóveis	175	110	Marli figueredo	Yes	11407686976		Brasil				Branca	Paraná	Colombo	Rua Campo do Tenente	1032	Guaraituba	83410230	41998196636	matheus.gabrield143@gmail.com	No	No		No	No	No	No	No	00/00/00	No		No	Yes	No	Yes	Yes	Yes	Yes	No	No	No	Yes	Yes	Yes	Yes	No	No informado	No
Yes	Feminino	Próximo Imoveis	164cm	52	Fabiana Ribeiro Businari de Almeida	Yes	41124003819		Brasil				Branca	PR	COLOMBO	CASA	36	JARDIM DAS GRAÇAS	83407640	41997707436	suzana567almeida@gmail.com	No	No		No	No	No	No	No	00/00/00	No		No	No	No	No	No	No	No	No	No	No	No	No	No	No	No	No informado	No
Yes	Masculino	tgmaq	179	105	tania marcia Lima de assis	Yes	07596261973		brasil				Branca	Parana	Curitiba	rua osmario de lima	909	Capao da imbuia	82800310	41988547334	danilo.lima.assis@hotmail.com	No	No		No	Yes	No	No	Yes	07/09/20	No		Yes	Yes	No	Yes	Yes	Yes	Yes	No	Yes	Yes	No	No	Yes	No	No	No informado	No
Yes	Feminino	Do lar	163cm	80	Tereza Santos Marchakowski	Yes	67263860953		Brasil				Branca	Paraná	Curitiba	Rua vereador constante pinto	63	Bacacheri	82510-240	41995214646	Mmarchakowski@gmail.com	No	No		No	Yes	Yes	No	Yes	05/09/2020	No		No	Yes	No	Yes	No	Yes	No	No	Yes	Yes	Yes	No	Yes	No	No	No informado	No
Yes	Masculino	Marceneiro barracão proprio	1.75	69	Marlene Terezinha gaito	Yes	02253389986		Brasil	Curitiba			Parda	Parana	Curitiba	Dr Estevam ribeiro de Souza Netto	579	Cajuru	82900060	995859358	claytong76@gmail.com	No	No		No	No	No	No	Yes	06/09/2020	No		Yes	Yes	No	No	Yes	Yes	Yes	No	Yes	Yes	No	No	No	No	No	No	No
Yes	Feminino	LGM LTDA	165cm	73	Ivone Gallina Leite	Yes	65615620978		Brasil	Brasil			Branca	PR	Araucaria	Rua Joana Geraldello	43	Barigui	83707-510	41999966720	cleia.lmoraes@yahoo.com.br	No	No		Yes	No	No	No	No	03/08/20	No	36	No	No	No	No	No	No	No	No	No	No	Yes	Yes	No	No	No	No informado	Yes
Yes	Masculino	SESA	183	67	Gilma Alcalde Tegon de Souza	Yes	41342280857		Brasil				Branca	PR	Curitiba	Rua Pedro Rolim de Moura	20	Alto da Glória	80030250	12997637978	rafaelalcalde11@gmail.com	No	No		No	Yes	No	No	No	00/00/00	No		No	No	No	No	No	No	No	No	No	No	No	No	No	No	No	No	No
Yes	Feminino	Banco Bradesco	171	72	Elza Maria Pinto	Yes	36525453895		Brasil				Branca	Paraná	Curitiba	Rua Pedro gusso	12	Novo munot detectedo	81050200	41992809992	annagabriella.caetano@hotmail.com	No	No		No	No	No	Yes	Yes	07/09/2020	Yes	38.3	Yes	Yes	Yes	Yes	Yes	Yes	Yes	No	Yes	Yes	No	No	Yes	Yes	Yes	No informado	Yes
Yes	Masculino	Representante comercial	177	93	Madalena Mariano da Silva Ribeiro	Yes	051590999980		Brasil	Paraná			Parda	Pr	Curitiba		3451	Alto Boqueirão	81750000	41997818068	ribeirogpr64@gmail.com	No	No		No	No	No	No	No	04092020	No	Nao	Yes	No	No	Yes	Yes	Yes	No	No	Yes	Yes	No	No	Yes	No	No	No informado	No
Yes	Masculino	Em casa	163	67	Silvia Maria da Silva e Sá	Yes	03460147946		Brasil				Branca	Paraná	Curitiba	Rua Xingu	1328	Bairro alto	82840300	41997182826	alexanot detectedre-sa@live.com	No	No		No	Yes	No	No	Yes	06092020	Yes	36	Yes	Yes	No	Yes	No	Yes	No	Yes	No	No	Yes	No	Yes	Yes	No	No informado	Yes
Yes	Feminino	Apositiveentadoria	1.55	55	Sinot detectedonia Maria de Jesus Pereira	Yes	68955103972		Brasil				Branca	Pr	Pinhais	Cascavel	787	Alto tarumã	83325 240	997317166	Adenilson.dino@gmail.com	No	No		No	Yes	No	No	Yes	08/09/2020	No		Yes	No	No	Yes	Yes	Yes	No	No	No	Yes	No	Yes	No	No	No	No informado	Yes
Yes	Masculino	Prohawk	177	118	Maria Wilsenia Bruno Pinto	Yes	07231155910		Brasil	Curitiba			Branca	PR	Curitiba	Rua capitão Leônidas Marques	2410	Uberaba	81560-360	41987434910	israellrebordao@gmail.com	No	No		Yes	No	No	No	No	000000	No		No	No	No	No	No	No	No	No	No	No	No	No	No	No	No	No informado	No
Yes	Feminino	Estudante PUCPR	1.54	55	Mary Cristiane Ferreira Zanona	Yes	39005066806		Brasil	Curitiba			Branca	Paraná	Curitiba	Rua Guilherme Pusgley	1158	Agua Verde	80620000	996261832	izamary_zanona@hotmail.com	No	No		No	No	No	No	No	00/00/00	No		No	No	No	No	No	No	No	No	No	No	No	No	No	No	No	No	No
Yes	Masculino	Unidade de Saúde Ouvidor Pardinho	183	105	Elenice Cristina do Rossio Espírito Santo Becker	Yes	08107412966		Brasil	Curitiba		706803772464021	Branca	Parana	Curitiba	Marechal Deodoro 1329	1329	Centro	80020320	988022600	becker.ves@gmail.com	No	No		No	No	No	Yes	No	00/00/00	No		No	No	No	No	No	No	No	No	No	No	No	No	No	No	No	No	No
Yes	Masculino	Renault do Brasil	179	85	Elisa Maria da Silva Coelho	Yes	40197292801		Brasil				Branca	Paraná	Curitiba	Rua Schiller	33	Cristo Rei	80050260	41992710708	lucas.coelho.mec@gmail.com	No	No		No	No	No	No	No	.	No		No	No	No	No	Yes	No	No	No	No	No	No	No	No	No	No	No	No
Yes	Feminino	Casa	165	90	Rosicleia Triaquim	Yes	08566457960		Brasil	Curitiba			Branca	Parana	Curitiba	Osmario de lima	909	Capão da imbuia	82810260	41992446629	gautriaquim@gmail.com	No	No		No	Yes	No	No	Yes	07/09/2020	No		Yes	No	No	Yes	Yes	Yes	Yes	No	Yes	Yes	No	No	No	No	No	No informado	Yes
Yes	Masculino	Autônomo	180 cm	93	Maria Madalena granot detectedi Passos	Yes	05070640976		Brasil				Branca	Paraná	Curitiba	Emiliano Perneta	10	Centro		41988570883	Clovisgodoy@hotmail.com	No	No		No	No	No	Yes	No	000000	No		No	No	No	No	No	No	No	No	No	No	Yes	No	No	No	No	No informado	No
Yes	Masculino	Superintenot detectedência Geral de Ciência, Tecnologia e Ensino Superior	174	72	Maria Beatriz Maluf	Yes	07995144970		Brasil	Curitiba			Branca	Paraná	Curitiba	Guilherme Pugsley	1959	Água Verde	80620-000	41996782160	gusuepg@gmail.com	No	No		No	Yes	No	No	No	000000	No		No	No	No	No	No	No	No	No	No	No	No	No	No	No	No	No informado	No
Yes	Feminino	Escola ápice	160cm	80	Roseli Pimentel Muller dos santos	Yes	07730353970		Brasil	Brasil			Branca	PR	Curitiba	Rua	208	Tatuquara	81480070	41995280714	valentinacestas@gmail.com	No	No		No	Yes	Yes	Yes	No	30/08	Yes	38	No	Yes	No	Yes	Yes	Yes	Yes	No	No	No	No	No	No	No	No	No informado	No
Yes	Feminino	SETI	1.7	75	Silvana Lopes Denicievicz	Yes	10584932995		Brasil	Curitiba	No positivesui		Branca	PR	Curitiba	Brasilio Itiberê	572	Jardim botanico		42988024268	sdenicievicz@gmail.com	No	No	Idade gestacional Ignorada	Yes	No	No	Yes	Yes	05/09/2020	No		Yes	Yes	No	No	No	Yes	No	No	No	No	No	No	No	No	No	No informado	Yes
Yes	Masculino	Paraná previdência	170	108	Glaci de Jesus fagunot detectedes	Yes	02447129998		Brasil				Branca	Pr	Pinhais	Rua cascavel	787	Alto tarumã	83325240	997314166	adenilson.dino@gmail.com	No	No		No	Yes	Yes	No	Yes	06/09/20	No		Yes	Yes	Yes	Yes	Yes	No	Yes	No	Yes	No	No	No	No	No	No	No informado	Yes
Yes	Masculino	Carga pesada guincho	170	96	Nilse Maria oliboni	Yes	06756880942		Brasil	Brasil			Branca	PR	Curitiba	Rua	208	Tatuquara	81480070	41995229662	valentinacestas@gmail.com	No	No	Idade gestacional Ignorada	Yes	Yes	Yes	Yes	No	000	No		No	No	No	No	No	No	No	No	No	Yes	No	No	No	No	No	No informado	No
Yes	Feminino	Centro	173	87	Maria Luiza Menot detectedes	Yes	06837324632		Brasil	Curitiba			Branca	PR	CURITIBA	RUA FRANCISCO TORRES	381	CENTRO	80060-130	41999041709	taisprevedello@gmail.com	No	No		No	No	No	No	No	00/00/00	No		No	No	No	No	No	No	No	No	No	No	No	No	No	No	No	No informado	No
Yes	Masculino	Apositiveentado	170cm	80	Alice Filomena Pereira	Yes	54901057987		Brasil	Curitiba	Sem passaporte		Branca	Paraná	Curitiba	Rua Manoel Correia de Freitas	1609	Jardim Social	82530-070	41992422508	luis.m113@hotmail.com	No	No		No	No	No	No	No	00/00/00	No		No	No	No	No	No	No	No	No	No	No	No	No	No	No	No	No	No
Yes	Feminino	Estudante	163cm	72	Eudes Vilela de Amorim	Yes	81537239449		Brasil	Curitiba	GB5 16561	898004527047819	Branca	Paraná	Curitiba	Rua Manoel Correia de Freitas	1609	Jardim Social	82530-070	41997043513	alineamorim2007@yahoo.com.br	No	No		No	No	No	No	No	00/00/00	No		No	No	No	No	No	No	No	No	No	No	No	No	No	No	No	No	No
Yes	Feminino	No trabalha	1.65	83	Noelci Cordeiro dos Santos	Yes	39672360215		Brasil	Curitiba			Branca	Paraná	Curitiba	Rua Santa Catarina	101	Agua Verde	80620100	991321100	dudoca.almeida@hotmail.com	No	No		No	Yes	Yes	Yes	Yes	25.08.2020	Yes	37.7	Yes	Yes	Yes	Yes	Yes	Yes	Yes	Yes	No	Yes	No	No	Yes	No	No	No informado	Yes
Yes	Feminino	Hospital de Clínicas	1,64cm	90	Maria Salete Maciel Brenny	Yes	03476902978		Brasil	Curitiba			Parda	Paraná	Curitiba	Rua Constantino Tedesco	129	Boqueirão	81670350	41997902453	marilainebrenny@hotmail.com	No	No		No	Yes	Yes	Yes	Yes	06/09/20	No		No	Yes	Yes	Yes	No	Yes	No	No	No	No	Yes	Yes	No	No	No	No informado	Yes
Yes	Feminino	Home office	151	52	Rita de Cássia Guimarães Guides	Yes	00738946990		Brasil	Curitiba			Branca	Paraná	Curitiba	Alameda Presidente Taunay	307	Batel	80420180	41999721100	thaistiemann@hotmail.com	No	No		Yes	No	No	No	No	000000	No		No	No	No	No	No	No	No	No	No	No	No	No	No	No	No	No informado	Yes
Yes	Masculino	Casa	168cm	47	Dinorah Aparecida Magnani Ramos	Yes	10366810928		Brasil				Branca	PR	Pinhais	Adolfo Sora	30	Pineville	83325580	41996181007	viini100@gmail.com	No	No		No	No	No	No	Yes	07/09/2020	No		No	No	Yes	No	Yes	No	Yes	No	No	No	No	No	No	Yes	No	No informado	No
Yes	Masculino	COP ADVOGADOS ASSOCIADOS	189CM	118	NATIVIDADE MARIA ORLOSSQUI CAVALCANTE DA SILVA	Yes	30749080841		BRASIL	CURITIBA			Branca	PARANÁ	CURITIBA	RUA JORGE BONN	231	TINGUI	82600290	41996592411	RONALDOORLOSQUI@GMAIL.COM	No	No		No	Yes	No	Yes	No	00/00/00	Yes	36.1	Yes	Yes	No	Yes	No	No	Yes	No	No	No	No	Yes	No	No	No	No informado	No
Yes	Masculino	Escritorio	181cm	83	Patricia de Lima	Yes	08727714900		Brasil				Ignorado	PR	Sao jose dos Pinhais					41995445445	murilo_felipe@hotmail.com	No	No		No	No	No	No	No	00/00/00	No		No	No	No	No	Yes	No	Yes	No	No	No	No	No	No	No	No	No	No
Yes	Feminino	COP ADVOGADOS ASSOCIADOS	169	100	MARIA MADALENA GRAnot detectedI PASSOS	Yes	05498556969		BRASIL	CURITIBA			Branca	PARANÁ	CURITIBA	RUA JORGEE BONN	231	TINGUI	82600290	41988773361	BRUNAGRAnot detectedI@GMAIL.COM	No	No		No	No	No	Yes	No	00/00/00	Yes	36.5	No	No	Yes	No	No	Yes	Yes	No	No	No	Yes	No	No	No	Yes	No informado	No
Yes	Feminino	ApositiveENTADA	167	76	ELVIRA ROCHA	Yes	12859222804		BRASIL	CURITIBA			Branca	PARANA	CURITIBA	RUA JORGE BONN	231	TINGUI	82600290	41996665922	RONALDOORLOSQUI@GMAIL.COM	No	No		No	No	No	Yes	No	00/00/00	Yes	34.9	No	No	No	Yes	No	No	No	No	No	No	No	No	No	No	No	No informado	No
Yes	Masculino	Autônomo em casa	171cm	94	Elimarta Artigas de Faria	Yes	08834409973		BraYes	Curitiba			Branca	PR	Curitib			Boa vista	8265002p	41996945037	groovemagnoticias@gmail.com	No	No		No	No	No	No	No	00/00/00	No		No	No	No	No	No	No	No	No	No	No	No	No	No	No	No	No	No
Yes	Feminino	Uninter	170	85	Zoneide Chagas	Yes	07701178996		Brasil	Curitiba			Branca	Paraná	Curitiba	Rua Waldemar Portugal Freixo	496	Boa Vista	82650020	41997911053	tatillaaddor@icloud.com	No	No		No	No	No	No	No	00/00/00	No		No	No	No	No	No	No	No	No	No	No	No	No	No	No	No	No	No
Yes	Feminino	Desempregada	180	88	Marilza conerado França	Yes	09431946955		Brasil	Curitiba			Branca	Parana	Curitiba	Apeles De Ferrante	51	Capao da imbuia	82810290	41999448559	Vitoria_katrine@hotmail.com	No	No		No	Yes	Yes	Yes	No	000000	No		No	No	No	No	No	No	No	No	No	No	No	No	No	No	No	No informado	No
Yes	Masculino	Escritorio	1.75	70	Cintia das Graças	Yes	07849894944		Brasil	Curitiba			Branca	PR	Curitiba					41984732021	brefontoura@hotmail.com	No	No		Yes	No	No	No	No	000000	No		No	No	No	No	No	No	No	No	No	No	No	No	No	No	No	No	No
Yes	Masculino	Alep	1.75	70	Regina Bonato	Yes	32076851968		Brasil	Centro			Branca	Parana	CURITIBA	CONSELHEIRO ARAUJO	108	Centro	80060230	41999746834	drbonato@yahoo. Com.br	No	No		No	Yes	Yes	Yes	Yes	09/09/2020	Yes	37.5	No	Yes	No	Yes	No	No	Yes	No	No	No	Yes	No	No	No	No	No	No
No	Masculino	Quartel do Boqueirão (Exército Brasileiro)	176cm	74	Janice Maria Bonato	Yes	10295949961		Brasil	Curitiba			Branca	PR	Curitiba					41996303000	gustavohbonato@gmail.com	No	No		No	Yes	Yes	Yes	Yes	10/09/2020	Yes	37.8	Yes	No	Yes	Yes	No	Yes	No	No	No	No	No	No	Yes	No	No	No	Yes
Yes	Feminino	Colégio Adventista Pinhais	167	69	Dilcléia de Fátima Pereira Buhrer	Yes	09288940960		Brasil				Branca	Paraná	Piraquara	Rua Dom Pedro l	153	Jardim Bela Vista	83301270	4191119610	buhrer33@gmail.com	No	No		No	No	No	Yes	No	00/00/00	No		No	No	No	No	Yes	Yes	Yes	No	No	No	Yes	No	No	No	No	No informado	No
Yes	Masculino	Curitiba	172	69	Nilsa da rocha Razoto	Yes	06957947955		Brasil				Branca	Pr	Curitiba	Rua Rosa sahagoff	52	Uberaba	81580140	41996602836	vrazoto@gmail.com	No	No		No	No	No	No	No	00/00/00	No		No	No	No	No	No	No	No	No	No	No	No	No	No	No	No	No informado	No
Yes	Feminino	Curitiba	169	64	Rose Maria de Lima	Yes	38319332869		Brasil				Branca	PR	Curitiba					41997434529	tatiane.l.ho@gmail.com	No	No		Yes	No	No	No	No	00/00/00	No		No	No	No	No	No	No	No	No	No	No	No	No	No	No	No	No	No
Yes	Feminino	Estudante em casa	167	76	Michella Cristina de Miranot detecteda	Yes	07357263967		Brasil				Branca	Paraná	Curitiba	Av Iguaçu	998	Rebouças	80230020	47999118071	pamela_anot detectederle@hotmail.com	No	No		No	No	No	No	No	00/00/00	No		Yes	No	No	No	Yes	No	No	No	No	No	Yes	No	No	No	No	No informado	No
Yes	Feminino	Escola - ensino funot detectedamental 1	163	74	Terezinha Freitas da Silva	Yes	72448660204		Brasil				Parda	Paraná	Curitiba	Rua Dona Alice Tibiriçá 740	740	Bigorrilho	80730320	41999938317	caroldekacia@hotmail.com	No	No		No	No	No	No	Yes	07/09/2020	No		Yes	Yes	No	Yes	Yes	Yes	Yes	No	No	No	No	No	No	Yes	No	No informado	Yes
Yes	Masculino	No trabalho	190	95	Claudia dos Santos	Yes	09914019994		Brasil				Branca	PR	Curitiba	Rua Santa Clara	116	Ahu	82200380	41996604966	claudiohost@gmail.com	No	No		Yes	No	Yes	No	No	00/00/00	No		No	No	No	No	No	No	No	No	No	No	No	No	No	No	No	No	No
Yes	Feminino	Consultório Odontológico	170	59	Maria Lúcia de Miranot detecteda	Yes	02577417985		Brasil				Branca	PR	Curitiba	Av. Iguaçu	998	Rebouças	80.230-020	47997004478	michellacmiranot detecteda@gmail.com	No	No		Yes	Yes	No	No	No	00/00/00	No		No	No	No	Yes	No	Yes	No	No	No	No	No	No	No	No	No	No	No
Yes	Masculino	CHC-UFPR	170	54	Anot detectedréa	Yes	06966190918		Brasil				Branca	PR	Curitiba	Rua Carneiro Lobo	456	Água Verde	80240240	41999903333	bernardomddomingues@gmail.com	No	No		No	No	Yes	Yes	No	00/00/00	No		No	No	No	No	Yes	Yes	No	No	No	No	Yes	No	No	No	No	No	No
Yes	Masculino	Bradesco	177	80	Anna Maria De Masi Sebrão	Yes	49165070968		Brasil	Curitiba			Branca	PR	Curitiba					41991596934	carlossebrao@bol.com.br	No	No		No	No	No	No	No	00/00/00	No		No	No	No	No	Yes	No	No	No	No	No	No	No	No	No	No	No informado	Yes
Yes	Feminino	Estudante	1.63	54	Michella Cristina de Miranot detecteda	Yes	07357264939		Brasil				Branca	Paraná	Curitiba		998	Rebouças	80230020	47999281053	camila_anot detectederle@hotmail.com	No	No		No	No	No	No	No	00/00/00	No		No	No	No	No	No	No	No	No	No	No	No	No	No	No	No	No informado	No
Yes	Masculino	Universidade a Federal do Paraná	167	68	Bernadeth De Lourdes Patrício	Yes	00781059356		Brasil	Curitiba			Amarela	PR	Curitiba	Rua Edmunot detectedo Angely	268	Jardim das Américas	81520210	85997275152	bpatriciocosta@gmail.com	No	No		Yes	No	No	No	No	00/00/00	No		No	No	No	No	Yes	No	Yes	No	No	No	No	No	No	No	No	No	No
Yes	Masculino	Inot detectedústria	175	75	Denise Ramon Sade withers	Yes	06633317905		Brasil	Curitiba			Branca	Paraná	Curitiba	Rua Santamaria	395	Novo munot detectedo	81030410	41992731957	Caiowithers@Yahoo.com.br	No	No		No	No	No	No	No	00/00/00	No		No	No	No	No	No	No	No	No	No	No	No	No	No	No	No	No informado	No
Yes	Feminino	home office	165cm	59	Lúcia Cristina Alves da Rocha	Yes	06843242960		Brasil				Branca	PR	Curitiba	Rua Brasílio Itiberê	4345	Água Verde	80240-060	41999218888	elisamohr89@gmail.com	No	No		Yes	No	No	No	No	00/00/00	No		No	No	No	No	No	No	No	No	No	No	No	No	No	No	No	No	No
Yes	Feminino	UFPR	176	77	Silvana Aparecida Ikeda	Yes	04179931966		Brasil				Branca	PR	Curitiba	Rua Doutor Jose Palu	451	Novo Munot detectedo	81020-050	41999440598	angela.ikeda@gmail.com	No	No		No	No	No	Yes	No	00/00/00	No		No	No	No	No	No	No	No	No	No	No	No	No	No	No	No	No informado	No
Yes	Feminino	No trabalho	1.73	67	Glaucia de Oliveira Santos	Yes	10563802928		Brasil				Branca	Paraná	Pinhais	Rua Vicente D'Anot detectedrea	581	Estância Pinhais	83323190	41987501348	luanatreska06@gmail.com	No	No		No	No	No	Yes	No	00/00/00	No		No	No	No	No	No	No	No	No	No	No	No	No	No	No	No	No	No
Yes	Masculino	Autônomo	179	68	Tereza Martini Ross	Yes	03873992914		Brasil				Branca	PR	Curitiba	Rua Yesão bolívar	669	Juvevê	80040140	41999775990	martiniross@gmail.com	No	No		Yes	No	No	No	No	000000	No		No	No	No	No	Yes	No	Yes	No	No	No	No	No	No	No	No	No informado	No
Yes	Masculino	Poliservice	180cm	78	Tereza da rocha bueno	Yes	02654037908		Brasil	Colombo			Parda	Pr	Curitiba	83410390	181	Guaraituba	83410390	41999301634	gedersonblack@gmail.com	No	No		No	Yes	Yes	No	Yes	02/09/2020	Yes	37.5	No	Yes	No	Yes	Yes	Yes	Yes	Yes	No	Yes	No	No	Yes	No	Yes	No informado	Yes
Yes	Masculino	Funot detectedação Araucária	1.7	80	Marilda Mai Miranot detecteda	Yes	93411839953		Brasil	Curitiba			Branca	PR	Curitiba	Avenida dos Estados	53	Água Verde	80610040	95394206	joelsonm.fa@gmail.com	No	No		No	Yes	Yes	No	No	00/00/00	No		No	No	No	No	No	No	No	No	No	No	No	No	No	No	No	No informado	No
Yes	Feminino	Farmácia Pública do Paraná (prédio da SESA)	170	62	Maria de Fátoima	Yes	08451718957		Brasil				Branca	PR	Curitiba	Rua Brasílio Itiberê	4290	Água Verde	80240050	41996736599	giovannabsari@gmail.com	No	No		No	Yes	Yes	No	No	07/09/20	No		No	No	Yes	Yes	No	Yes	No	No	No	No	No	Yes	No	No	No	No	No
Yes	Feminino	Hospital de Clínicas	166 cm	80	Cleide Jeremias dos Santos	Yes	83628070910		Brasil				Branca	PR	Curitiba					999998078	sanot detectedracatarino@yahoo.com.br	No	No		No	Yes	No	Yes	No	000000	No		No	Yes	No	No	No	Yes	No	No	No	No	No	No	No	No	No	No informado	No
Yes	Feminino	Upa Colombo	1.61	59	Denize do Rocio Denis dos Santos	Yes	09822128959		Brasil				Branca	PR	Araucária	Rua Cel João Antonio Xavier,	335	Centro	83702-420	41996112712	renatahellen_@hotmail.com	No	No		No	Yes	No	Yes	Yes	06/09/20	No		No	No	No	No	Yes	Yes	No	No	No	No	No	No	No	No	No	No	No
Yes	Masculino	Academia tecfit/smartfit	175	70	Elisabeth aparecida pinto bueno	Yes	34210961809		Brasil				Branca	PR	Curitiba	Avenida Iguaçu	1427	Água verde	80250190	41991748993	anot detectederson_bueno@msn.com	No	No		No	Yes	No	Yes	No	30/02/2020	No		No	Yes	No	No	Yes	Yes	Yes	No	No	No	No	No	No	No	No	No informado	No
Yes	Masculino	Ferroeste S/A	179cm	92	Julia Lorenz Oscar	Yes	04173518951		Brasil	Brasil			Preta	Paraná	Curitiba	Rua Amazonas	642	Água Verde	80610-030	41996551419	julianolorenz@gmail.com	No	No		No	No	No	No	No	00/00/00	No		No	No	No	No	No	No	Yes	No	No	No	No	No	No	No	No	No informado	No
Yes	Masculino	Infinity Assessoria Empresarial	185	100	Júlia de Mello Rocha	Yes	09397422928		Brasil	Curitiba			Branca	Paraná	Curitiba	Avenida visconot detectede de guarapuava	2305	Centro	80010100	44999640501	henriquedemellorocha@gmail.com	No	No		No	Yes	Yes	Yes	Yes	05/09/2020	No		Yes	Yes	Yes	No	Yes	Yes	Yes	No	Yes	No	No	Yes	No	No	No	No	No
Yes	Feminino	UFPR	175	82	Virginia Célia Damiani Ferreira	Yes	08422497964		Brasil				Branca	Paraná	Curitiba				80410180	41996695338	abferreira@live.com	No	No		No	Yes	No	Yes	No	00/00/00	No		No	No	No	No	No	No	No	No	No	No	No	No	No	No	No	No	No
Yes	Feminino	Vital Medicina Diagnostica	167	80	Elenice Valaschenski	Yes	90420993991		Brasil				Parda	Parana	Pinhais	Manoel Pereira da Silva	77	Pq das nascentes	83327020	41991962868	Lucianeciruelos@gmail.com	No	No		No	Yes	Yes	No	No	6092020	No		No	No	No	No	No	Yes	No	No	No	No	No	Yes	No	No	No	No informado	No
Yes	Masculino	Univewrsidade Tuiti do Paraná	2.14	150	Soeli Pimentel Ferreira	Yes	06484058857		Brasil	Curitiba			Branca	Pr	Curitiba	Rua Coronel José Carvalho de Oliveira	713	Uberaba	81570160	41984116450	ferreirarolanot detectedo8@gmail.com	No	No		No	No	No	Yes	No	00/00/0000	No		No	No	No	No	No	No	No	No	No	No	No	No	No	No	No	No informado	No
Yes	Feminino	Bradesco	175	62	Thereza Pilon	Yes	07111896840		Brasil				Branca	PR	Curitiba	Rua Cel. José Carvalho de Oliveira	713	Uberaba	81570160	41984226044	vcdferreira@gmail.com	No	No		No	No	No	No	No	00/00/0000	No		No	No	No	No	No	No	No	No	No	No	No	No	No	No	No	No informado	No
Yes	Masculino	Casa	195	135	Virginia Celia Damiani Ferreira	Yes	09010365956		Brasil				Branca	Parana	Curitiba					041987795867	daniel.damiani.ferreira@gmail.com	No	No		No	No	No	Yes	No	00/00/00	No		No	No	No	No	No	No	No	No	No	No	No	No	No	No	No	No informado	No
Yes	Masculino	Redisul Informática Ltda	187	81	Jana Boiko da Silva	Yes	00403856981		Brasil	Campo Magro			Branca	PR	Campo Magro	Travessa Benjamin Basso,	507	Jd. Nova Villa	83535-000	41992592031	feliciano@redisul.com.br	No	No		No	No	No	No	No	Sem sintoma	No		No	No	No	Yes	No	No	No	No	No	No	No	No	No	No	No	No informado	No
Yes	Feminino	Curitiba	1:50	64	Olinot detecteda Pfaffenzeller Roling	Yes	87595397987		Brasil	Campo Magro			Branca	PR	Campo Magro	Benjamim Basso	507	Nova Villa	83535000	41992685588	aroling@hotmail.com	No	No		No	No	No	Yes	No	000000	No		No	No	No	No	No	Yes	No	No	No	No	No	No	No	No	No	No informado	No
Yes	Masculino	Ainot detecteda nenhum.	177	79	Maria Leda Magalhães Dourado Santos	Yes	06029605925		Brasil				Parda	Paraná	Curitiba	Rua Doutor Pedrosa	78	Centro	80420120	41998114880	antonio_magalhaes1@outlook.com	No	No		No	Yes	Yes	Yes	Yes	09/09/20	No		Yes	Yes	No	No	No	Yes	No	No	No	No	No	No	No	No	No	No	No
Yes	Masculino	Curitiba	177cm	115	Lizete Maria Mallmann	Yes	07794330920		Brasil				Branca	Paraná	Curitiba					41991095600	arnonfagunot detectedes@gmail.com	No	No		No	No	No	No	No	00/00/00	No		No	No	No	No	No	No	No	No	No	No	No	No	No	No	No	No informado	No
Yes	Masculino	efectus	185	95	Maria Iraide de Souza	Yes	03339817901		Brasil	Curitiba			Branca	Pr	curitiba	Marques do Paraná	1533	agua verde	80620210	41998930055	rene@efectusdigital.com.br	No	No		Yes	Yes	No	No	No	05/11/2020	No	36.5	Yes	Yes	No	Yes	Yes	Yes	Yes	No	No	No	Yes	No	No	No	No	No informado	No
Yes	Masculino	Curitiba	160cm	82	Elzilane de Souza Roberto	Yes	10227249755		Brasil				Parda	PR	Curitiba	Rua Valério Haisi	12	Santa Felicidade	82020680	41992653916	Sales.tales@bol.com.br	No	No		No	Yes	Yes	No	Yes	07/09/2020	Yes	38.7	Yes	Yes	Yes	No	Yes	Yes	Yes	No	Yes	Yes	Yes	No	Yes	No	No	Yes	Yes
Yes	Feminino	Curitiba (FIEP)	165	78	Maria Iraide de Sousa	Yes	00660438917		Brasil	Curitiba			Branca	PR	Curitiba	Rua Padre Agostinho	1820	Bigorrilho	80710000	41984799474	michelecoradin@gmail.com	No	No		Yes	No	No	Yes	No	00/00/00	No		No	Yes	No	No	No	No	No	No	No	No	No	No	No	No	No	No informado	No
Yes	Feminino	Viasoft Korp	164	54	Sanot detectedra Mara dos Santos Colaço	Yes	00946633940		Brasil				Branca	PR	Curitiba	Avenida Visconot detectede de Guarapuava	3084	Centro	80010100	42999638508	thaistopolski@gmail.com	No	No		No	No	No	No	No	00/00/00	No		No	No	No	No	No	Yes	No	No	No	No	No	No	No	No	No	No informado	No
Yes	Feminino	Curitiba	164 cm	70	Nair Bucco Wisnievski	Yes	02423932928		Brasil	Curitiba			Branca	Paraná	Curtiba	Rua Germano Roggenbaum	192	Santa Felicidade	82020670	41996045292	psicologavivianewis@gmail.com	No	No		Yes	No	No	Yes	Yes	06/09/20	No		Yes	Yes	Yes	Yes	Yes	Yes	Yes	No	Yes	Yes	No	No	No	No	No	No	Yes
Yes	Masculino	Taido Sushi Delivery	171	71	Ana Cristina Amarante	Yes	08162725903		Brasil	Curitiba			Branca	Paraná	Curitiba	Av visconot detectede de guarapuava	3084	Centro	80010100	42998565933	turr_rodrigues@hotmail.com	No	No		No	No	No	Yes	No	000000	No		No	No	No	No	No	No	No	No	No	No	No	No	No	No	No	No informado	No
Yes	Feminino	Casa	167	64	Hildete Magalhães Dourado	Yes	23752467568		Brasil				Branca	Paraná	Curitiba	Rua Doutor Pedrosa	78	Centro	80420120	41996462928	leda@servelt.com.br	No	No		No	Yes	Yes	Yes	No	00/00/00	No		No	No	No	No	No	No	No	No	No	No	No	No	No	No	No	No	No
Yes	Masculino	Militar da reserva	168	83	Guiomar Elias de Campositive	Yes	22351299949		Brasil				Branca	Paraná	Curitiba					41999006468	aranot detectedadecampositive@gmail.com	No	No		No	No	Yes	No	No	00/00/00	No		No	No	No	No	No	No	No	No	No	No	No	No	No	No	No	No informado	No
Yes	Masculino	Casa	1.83	102	Wilma Previdi Anot detectedrade	Yes	01829291912		Brasil				Branca	Paraná	Curitiba	Rua Padre Manuel da Nóbrega	849	Fanny	81030-330	41995114939	fageral76@gmail.com	No	No		No	No	No	No	No	000000	No		No	No	No	No	No	No	No	No	No	No	No	No	No	No	No	No informado	No
Yes	Masculino	Estudante (UFPR)	180cm	100	Neli da Silva Paz	Yes	07576500905		Brasil				Branca	Paraná	Curitiba	Rua Lirio do Vale	232	Cajuru	82980000	41996828889	marciospaz@outlook.com	No	No		No	Yes	No	Yes	No	00/00/00	No		No	No	No	No	Yes	No	No	No	No	No	No	No	No	No	No	No informado	Yes
Yes	Masculino	Helisul Aviação	183	100	Sonia Regina Kochinski	Yes	04753361942		Brasil				Branca	PR	Curitiba	Rua Manot detectedirituba	2101	Sítio Cercado	81925540	41996609102	danielcansian@gmail.com	No	No		No	No	No	Yes	No	00/00/00	No		No	No	No	No	No	No	No	No	No	No	No	No	No	No	No	No informado	No
Yes	Feminino	Mg8	157	62	Leonor dos Santos	Yes	08299239931		Brasil	Curitiba	No positivesui		Branca	Paraná	Curitiba	Alameda nossa senhora sagrado coração		Pinheirinho		41998764644	nicollyds@hotmail.com	No	No		No	No	No	Yes	No	00/00/00	No		No	Yes	No	No	No	Yes	No	No	No	No	No	No	No	No	No	No informado	No
Yes	Feminino	Casa	163	65	Marcia Cordeiro Karas	Yes	04954456908		Brasil	Brasil			Branca	PR	Curitiba	Alameda Dom Pedro II	781	Batel	80420060	41998585341	annabkaras@gmail.com	No	No		No	No	No	No	Yes	09/09/2020	No		No	Yes	No	No	No	Yes	No	No	No	No	No	No	No	No	No	No informado	No
Yes	Feminino	Apositiveentada	155	57	Angelina M dos Santos	Yes	64042979904		Brasil	Curitiba	No positivesui		Branca	Paraná	Curitiba	Alameda nossa senhora do sagrado		Pinheirinho		41998510928	Lelesantos181@hotmail.com	No	No		No	No	No	Yes	No	00/00/00	No		Yes	No	No	No	Yes	Yes	No	No	No	No	No	Yes	No	No	No	No informado	No
Yes	Feminino	Tribunal de Justiça do Estado do Paraná	1.66	54	Sanot detectedra Cristina Perboni Neves	Yes	07389995980		Brasil	Curitiba			Branca	Paraná	Curitiba	Rua Angelo Massignan	1148	São Brás	82320480	41999446000	gabriellaperboni@gmail.com	No	No		No	No	No	No	No	00/00/00	No		No	No	No	No	No	No	No	No	No	No	No	No	No	No	No	No informado	No
Yes	Masculino	PUCPR	182	70	Katia Menot detectedes Zamuner Rosa Gameiro	Yes	06844539916		Brasil				Branca	PR	Curitiba					41987113790	rodrigorosagameiro@gmail.com	No	No		No	No	No	Yes	No	00/00/00	No		No	No	No	No	No	No	No	No	No	No	No	No	No	No	No	No	No
Yes	Feminino	AUTONOMA	158	67	ILSA SIRLEI DE MORAES	Yes	08141838911		BRASIL				Branca	PR	CURITIBA					41991395600	INGRID.KOSCHEL@GMAIL.COM	No	No		No	Yes	Yes	Yes	No	00/00/00	No		No	Yes	No	Yes	No	Yes	No	No	No	No	No	No	Yes	No	No	No	Yes
Yes	Masculino	CASA	177	107	JOSIANE FERRAZ	Yes	08236215962		BRASIL	CURITIBA			Branca	PR	CURITIBA	UBALDINO DO AMARAL	360	ALTO DA GLÓRIA	80060195	42999852561	kosinski_lucas@hotmail.com	No	No		No	No	No	Yes	Yes	08 09 2020	Yes		No	Yes	No	Yes	No	Yes	No	No	No	No	No	No	Yes	No	No	No informado	No
Yes	Feminino	Em casa	161 cm	52	Maria Sonia Medeiros Hirata	Yes	04293243917		Brasil	Curitiba			Amarela	Paraná	Curitiba	Rua Engenheiro Niepce da Silva	144	Portão	80610280	41988463381	talitaakemi@yahoo.com.br	No	No		No	Yes	Yes	No	No	00/00/00	No	36.2	No	No	No	No	No	No	No	No	No	No	No	No	No	No	No	No informado	No
Yes	Masculino	Autonomo	186	80	Sonia Carolina de Araujo	Yes	02477725939		Brasil				Ignorado	PR	Curitiba	Rua Piauí	1722	Guaira	80630300	41992016832	guidedomenico@gmail.com	No	No		Yes	No	No	No	Yes	08/09/2020	Yes	38.5	No	No	No	Yes	No	Yes	No	No	Yes	Yes	No	Yes	Yes	No	No	No informado	Yes
Yes	Feminino	Estudante UFPR	163	53	Vanot detectedira Rodrigues Lins	Yes	08818581961		Brasil				Branca	Pr	Curitiba	Avenida Iguaçu	1427	Água verde	80250190	41999381507	rodrigueslinsb@gmail.com	No	No		No	No	Yes	No	No	00/00/00	Yes	36	Yes	No	No	No	No	No	No	No	No	No	No	No	No	No	No	No	No
Yes	Feminino	Doutoranot detecteda na UFPR	165	56	Janot detectedira Damiani Fernanot detectedes	Yes	02796611930		Brasil	Curitiba			Amarela	Paraná	Curitiba	Rua Olivo Carnasciali	252	Cajuru	82970190	41991252751	Vanessa.ishibashi@gmail.com	No	No		No	No	No	No	No	00/00/00	No		No	No	No	No	No	Yes	No	No	No	No	No	Yes	No	No	No	No informado	No
Yes	Feminino	Casa, home office.	172cm	53	Eliene Quadra De Conto	Yes	05905534969		Brasil				Ignorado	PR	Curitiba					41998152560	deboraconto@hotmail.com	No	No		No	No	No	No	No	00/00/00	No		No	No	No	No	No	No	Yes	No	No	No	No	No	No	No	No	No informado	No
Yes	Feminino	Vert Essence Farmácia de manipulação	165	64	Nidia Beatriz Torres Arcega	Yes	01211440974		Brasil				Branca	Paraná	Curitiba				80010-120	41998907965	aylinarcegat@gmail.com	No	No		No	Yes	Yes	No	No	000000	No		No	No	No	No	No	No	No	No	No	No	No	No	No	No	No	No informado	No
Yes	Masculino	Funot detectedação Araucaria	179	93	Rosalina Walylo Joanico	Yes	05440615946		Brasil	Curitiba			Branca	Paraná	Curitiba					41991560040	Willrodj@gmail.com	No	No		No	No	No	Yes	No	00/00/00	No		No	No	No	No	No	No	No	No	No	No	No	No	No	No	No	No	No
Yes	Feminino	pucpr	167cm	76	rita Maria meurer	Yes	03910510914		brasil				Branca	Paraná	curitiba					41997255721	meurercristiana@gmail.com	No	No		No	No	No	No	No	00/00/00	No		No	No	No	No	Yes	No	Yes	No	No	No	No	No	No	No	No	No	No
Yes	Masculino	Curitiba	169	72	Divercina Ortiz Barros	Yes	07170936976		Brasil	Brasil			Parda	Paraná	Curitiba					41984051780	abimael.adv@hotmail.com	No	No		No	No	No	No	No	00/00/00	No		No	No	No	No	No	No	No	No	No	No	No	No	No	No	No	No	No
Yes	Masculino	Curitiba	180	130	ester Marques	Yes	11279116781		Brasil				Branca	parana	curitiba					4197255721	Meurercristiana@gmail.com	No	No		No	No	No	Yes	No	00/00/00	No		No	No	No	No	No	No	No	No	No	No	No	No	No	No	No	No	No
Yes	Feminino	Cmei	158 cm	47	Deborah Cristina Luiz Paes	Yes	08617648970		Brasil				Branca	Paraná	Curitiba	Rua frei Gaspar da Madre de Deus	339	Portão	08617648970	41996670960	rafaellapaes_@hotmail.com	No	No		No	No	No	Yes	No	00/00/00	No		No	No	No	No	Yes	No	No	No	No	No	No	No	No	No	No	No informado	No
Yes	Feminino	CPM	162	54	Lilian Martins de Almeida	Yes	08661841984		Brasil				Branca	PR	Curitiba	Rua Dom pedro II	41	batel	80420060	41996299047	polly.lili@gmail.com	No	No	Idade gestacional Ignorada	No	Yes	Yes	Yes	No	0000000	No		No	No	No	Yes	Yes	Yes	Yes	No	No	No	No	No	No	No	No	No	No
Yes	Feminino	Empresa	165	54	Marilda Marques	Yes	06155056943		Brasil				Branca	Paraná	Curitiba	Rua Riachuelo	110	Centro	80020250	41992531993	brunnah.marques@hotmail.com	No	No		No	Yes	No	No	No	No tive	No		No	No	No	No	No	Yes	No	No	No	No	No	No	No	No	No	No informado	No
Yes	Feminino	Em casa	175	75	Márcia Regina Rodrigues	Yes	09109192913		Brasil				Branca	PR	Curitiba	Rua tenente José Ribas kenot detectedrick	276	Cajuru	82970310	41998411715	thassiaanjos@gmail.com	No	No		No	Yes	No	No	No	00/00/00	No		No	No	No	No	No	No	No	No	No	No	No	No	No	No	No	No informado	No
Yes	Feminino	Escola privada de Curitiba.	161cm	64.5	Mabel Santos Marcelo	Yes	32014286809		Brasil	Curitiba	No tenho	1111	Parda	pr	Curitba	Rua Leoncio Derosso	564	xaxim	81810430	41998387617	patyzupo@yahoo.com.br	No	No		No	No	No	Yes	No	00/00/00	No		No	No	No	No	No	No	No	No	No	No	No	No	No	No	No	No informado	No
Yes	Masculino	BNE - CASA	181	86	Marlinot detecteda Goll	Yes	06125164900		Brasil				Branca	PR	Curitiba	Luiz gallieri	369	Uberaba	81560340	41997407723	anthuan121@gmail.com	No	No		No	No	No	No	No	0000000000	No		No	No	No	Yes	No	No	No	No	No	No	No	No	No	No	No	No informado	No
Yes	Feminino	RESIDENCIA	1,65cm	58	JULIA MARIANO ESTEVAM	Yes	47922842953		BRASIL	CURITIBA			Branca	PARANA	CURITIBA	RUA CLOTILDE GASPAR RIQUELME	159	CAPAO DA IMBUIA	82810410	41996581482	estevamcassia33@gmail.com	No	No		No	Yes	Yes	No	Yes	09\09/2020	No		No	No	No	No	No	Yes	No	No	No	No	No	No	No	No	No	No informado	No
Yes	Feminino	loja de roupas	162	88	Deolinot detecteda Martins de Almeida	Yes	03231854954		Brasil				Branca	PR	Curitiba	Alameda Dom pedro II	41	batel	80420060	41996299047	polly.lili@gmail.com	No	No		No	Yes	No	Yes	Yes	11/09/2020	No		No	Yes	No	Yes	Yes	Yes	Yes	No	No	No	No	No	No	No	No	No	Yes
Yes	Feminino	Escritorio empresa em casa/Coopersona Desenvolvimento Humano	1.57	55	Virgínia Silveira Cecconello	Yes	81587970910		Brasil				Branca	PR	Curitiba	Rua Mustapha kaiel,	135	Guabirotuba	81510470	41992098202	facegui@hotmail.com	No	No		No	No	No	No	No	00/00/00	No		No	No	No	No	No	No	No	No	No	No	No	No	No	No	No	No informado	No
Yes	Masculino	EM CASA E EM HOTEIS (AUTÔNOMO)	1.65	98	ONORINA DE ALMEIDA GUIMARÃES	Yes	64463427991		BRASIL				Branca	PARANÁ	CURITIBA	RUA MUSTAPHA KAIEL	135	GUABIROTUBA	81.510-470	41999290230	neyguimaraes@uol.com.br	No	No		Yes	No	No	No	No	00/00/00	No		No	Yes	No	No	Yes	Yes	Yes	No	No	No	Yes	No	No	No	No	No	No
Yes	Masculino	Autônomo	185cm	97	Marilze Vannucci	Yes	06643722950		Brasil				Branca	Paraná	Curitiba	Rua José Sabóia Cortes	77	Centro cívico	80530360	41996745628	bruno@regert.com.br	No	No		No	Yes	Yes	No	No	00/00/00	No		No	No	No	No	No	Yes	Yes	No	No	No	No	No	No	No	No	No informado	No
Yes	Masculino	Quartel do Comanot detectedo Geral - PMPR	1.74	77	Cilmara Knopka Theiss	Yes	07998992913		Brasil				Branca	PR	Curitiba	Rua Francisco Zuneda Ferreira da Costa	187	Bairro Alto	82840510	41996043418	guilhermetheiss@gmail.com	No	No		No	No	No	No	Yes	08/09/2020	No		No	Yes	No	No	No	Yes	No	No	No	No	No	Yes	No	No	No	No informado	No
Yes	Masculino	Exercito Brasileiro	175	65	Ana do Rocio Trinot detectedade Lafraia	Yes	9097515955		brasil	Parana	Yes		Branca	Paraná	Curitiba	Rua Alberto schumann	33	São Braz	82300670	41984255655	victorlafraia@hotmail.com	No	No		No	No	No	No	No	00000000	No		No	Yes	No	No	Yes	Yes	No	No	No	No	No	No	No	No	No	No	No
No	Masculino	casa	172cm	61	Casilda de Fatima dos Santos	Yes	09069649977		Brasil				Preta	Paraná	Curitiba	Rua Antônio Hildo Gelinski	253	Santa Cânot detectedida	82720-336	995899603	brunokerling@outlook.com	No	No		No	No	No	No	Yes	09/09/20	Yes	38.3	No	Yes	No	No	Yes	Yes	Yes	No	No	No	No	No	Yes	Yes	Yes	No informado	No
Yes	Feminino	Campo Comprido	1.65	56	Iolanot detecteda Ganho	Yes	02345687983		Brasil	Curitiba			Branca	PR	Curitiba	Rua Renato Polatti	3651	Campo Comprido	81230170	41999000445	julianaganho@hotmail.com	No	No		No	Yes	Yes	Yes	No	00/00/00	No		No	Yes	No	Yes	No	No	No	No	No	No	No	Yes	No	No	No	No	No
Yes	Feminino	Vital medicina diagnóstica	1.67	90	Elisabete Rodrigues de Oliveira	Yes	04005785905		Brasil	Curitiba			Parda	Paraná	Curitiba	Rua Francisco Lopes de Souza	56	Cajuru	82990120	41999160209	emanueleroliveira@bol.com.br	No	No		No	Yes	No	Yes	No	06/09/20	No		No	Yes	No	No	No	Yes	No	No	No	No	No	No	No	No	No	No informado	No
Yes	Masculino	Em casa	175	107	Cicera da Silva Prospero	Yes	31290893810	Criança até 12 anos	Brasil				Branca	Parana	Curitiba	Rua Walenty Golas	371	Campo Comprido	81200-520	41987666094	henriquepiocoppi@gmail.com	No	No		No	Yes	No	No	Yes	10/09/2020	Yes	37.9	Yes	No	No	Yes	Yes	Yes	No	No	No	Yes	Yes	No	Yes	No	No	No informado	Yes
Yes	Feminino	Apositiveentada	155cm	50	Maria José Trinot detectedade Pereira	Yes	82632693934		Brasil				Branca	PR	São José dos Pinhais	Rua João Brito	70	Jd. Cruzeiro	83010090	41995509575	torresjk41@gmail.com	No	No		No	Yes	Yes	No	No	00/00/00	No		No	No	No	No	No	No	No	No	No	No	No	No	No	No	No	No informado	No
Yes	Feminino	TJPR	159	47	Maria Estela Canot detectedatem Balestrini	Yes	0442814910		Brasil	Curitiba			Branca	PR	Curitiba					41988743787	estela_bale@hotmail.com	No	No		Yes	No	No	Yes	No	00/00/00	No		No	No	No	No	No	No	No	No	No	No	No	No	No	No	No	No informado	No
Yes	Masculino	Curitiba	1.69	76	Cirley Otacilia Berçott Fagunot detectedes Purgato	Yes	33642111831		Brasil				Branca	Paraná	Curitiba	Rua Jovino do Rosário	1790	Boa vista	82560435	41991239086	lg.fagunot detectedespurgato@gmail.com	No	No		Yes	No	No	Yes	No	No	No		No	No	No	No	No	No	No	No	No	No	No	No	No	No	No	No	No
Yes	Masculino	Rodovia log	172	90	Ivone Tobias da Silva	Yes	09347326984		Brasil				Branca	PR	São José dos Pinhais	Rua João Brito	70	Jd. Cruzeiro	83010090	4188107731	torresjk41@gmail.com	No	No		Yes	Yes	Yes	No	No	00/00/00	No		No	No	No	No	No	No	No	No	No	No	No	No	No	No	No	No informado	No
Yes	Feminino	EM CASA	160	42	FABIANA CECCONELLO GUIMARÃES	Yes	12109931981		BRASIL				Branca	PARANÁ	CURITIBA	RUA MUSTAPHA KAIEL	135	GUABIROTUBA	81510470	992805506	lorenaenha@gmail.com	No	No		No	No	No	No	No	00/00/00	No		No	No	No	No	No	No	No	No	No	No	No	No	No	No	No	No	No
Yes	Masculino	Viação Planalto	172cm	78	Dorvalina Pereira Torres	Yes	83746854920		Brasil				Branca	PR	São José dos Pinhais	Rua João Brito	70	Jd. Cruzeiro	83010090	4198743800	emilotorres@gmail.com	No	No		No	Yes	Yes	No	No	00/00/00	No		No	No	No	No	No	No	No	No	No	No	No	No	No	No	No	No informado	No
Yes	Feminino	Núcleo Regional da Educação Matriz	1:59 cm	55	Marcelina Gallo Canot detectedatem	Yes	35931760091		Brasil	Brasil			Branca	PR	Curitiba	Jovino do Rosário	1790	Boa Vista	82560435	999003335	mbalestrini59@gmail.com	No	No		No	No	No	No	No	00/00/00	No		No	No	No	No	No	No	No	No	No	No	No	No	No	No	No	No	No
Yes	Masculino	Vitofer comércio de ferro e aço.	169	100	Claudete de Almeida Garcia	Yes	03477379942		Brasil		Nao		Parda	Pr	Curitiba	Pedrina Acordes Costa	1320	Ganchinho	81935-420	41991435999	ralmeidagarcia@yahoo.com.br	No	No		Yes	Yes	Yes	No	No	00/00/00	Yes	35.6	No	No	Yes	No	No	No	Yes	No	Yes	Yes	No	No	No	No	Yes	No informado	Yes
Yes	Feminino	Escola de Aprenot detectedizagem	163	60	Claudia Aparecida da Silva e Campagnolo	Yes	07325127944		Brasil				Branca	PR	Curitiba	Rua Coronel Francisco de Paula Moura Brito	618	Bacacheri	82520570	41992010818	mah.campa@gmail.com	No	No		No	No	No	No	No	00/00/00	No		No	No	No	No	No	No	No	No	No	No	No	No	No	No	No	No informado	No
Yes	Masculino	Estudante	188cm	72	Leoricleia Aparecida Teixeira Donadel	Yes	11537077996		Brasil				Branca	Paraná	Curitiba					41988283443	gabriel.donadel7@gmail.com	No	No		No	No	No	No	No	00/00/00	No		No	No	No	No	No	No	No	No	No	No	No	No	No	No	No	No informado	No
Yes	Masculino	Sao jose dos pinhais como motorista	168	73	Claudette de almeida garcia	Yes	01035303981		Brasil				Branca	Paraná	Curitiba	Eduardo Pinto da rocha	3199	Sítio cercado	81935-000	991556930	Tarcisogarciajunior@hotmail.com	No	No		Yes	Yes	No	No	No	000000	No		No	No	No	No	No	No	No	No	No	No	No	No	No	No	No	No informado	No
Yes	Feminino	Estudante	169	53	Leoricléia Aparecida Teixeira Donadel	Yes	11537131958		Brasil				Branca	Paraná	Curitiba					999242944	gidtdonadel@gmail.com	No	No		No	No	No	No	No	00/00/00	No		No	No	No	No	No	No	No	No	No	No	No	No	No	No	No	No informado	No
Yes	Masculino	Av Erasto Gaertner 133	176	78	Anita Damian Donadel	Yes	39226140006		Brasil				Branca	Paraná	Curitiba					41999729054	kollegasm@bol.com.br	No	No		No	No	No	No	No	00/00/00	No		No	No	No	No	No	No	No	No	No	No	No	No	No	No	No	No	No
Yes	Feminino	Do lar	160cm	91	Leoricelia da Graça Teixeira Vianna	Yes	71365800997		Brasil				Branca	PR	Curitiba	Av. Nossa Senhora da Luz	250	Bacacheri	82510020	41988504793	leodonadel@uol.com.br	No	No		No	No	No	No	No	00/00/00	No		No	No	No	No	No	No	No	No	No	No	No	No	No	No	No	No informado	No
Yes	Masculino	Desempregado	180cm	65	Leoricleia Aparecida Teixeira Donadel	Yes	11537110950		Brasil				Branca	Paraná	Curitiba					41999007190	gustavodtdonadel@gmail.com	No	No		No	Yes	No	No	No	00/00/00	No		No	No	No	No	No	No	No	No	No	No	No	Yes	No	No	No	No informado	No
Yes	Feminino	Buona vita	155	80	Claudette de Almeida Garcia	Yes	04744414907		Brasil	Paraná			Branca	PR	Curitiba	Estrada do ganchinho	5561	Ganchinho	81935552	41992671919	Alealmeidagarcia@yahoo.com.br	No	No		No	Yes	Yes	No	Yes	20/08/2020	No		No	Yes	No	Yes	No	Yes	Yes	No	No	No	Yes	Yes	No	No	No	No informado	Yes
Yes	Feminino	Mppr	170	89	Elisabete Rodrigues Salomão	Yes	06656488986		Brasil	Curitiba			Parda	Paraná	Curitiba	Sr		Dr Pedrosa 194	80420-120	41998338937	priscilasj@gmail.com	No	No		No	No	No	Yes	No	00/00/00	No		No	No	No	No	No	No	No	No	No	No	No	No	No	No	No	No	No
Yes	Feminino	Desempregada	166	81	Elisabete Rodrigues Salomão	Yes	05259486943		Brasil	Curitiba			Branca	Paraná	Curitiba	João Fleury da Rocha	275	Sítio Cercado	81925040	41988036045	evelinesj@gmail.com	No	No		No	No	No	Yes	No	00/00/00	No		No	No	No	No	No	No	No	No	No	No	No	No	No	No	No	No	No
Yes	Masculino	Escola Municipal Cei Monteiro Lobato	174	68	Gladia Marinho Alves	Yes	03573542905		Brasil	Brasil			Branca	Paraná	Curitiba	Rua Reinaldo Stocco	546	Pinheirinho	81820020	41999752663	tianomarinho@yahoo.com.br	No	No		No	Yes	Yes	No	Yes	08/09/2020	No		No	No	No	Yes	No	Yes	Yes	No	No	No	No	Yes	No	No	No	No informado	No
Yes	Feminino	Casa	1.70	59	Elisabeth do Rosário Fantin	Yes	06744306979		Brasil	Brasil			Branca	Paraná	Curitiba				81935-000	41992237514	KarinaDS_L@hotmail.com	No	No		Yes	Yes	No	Yes	No	00/00/00	Yes	38.4	No	No	No	Yes	No	Yes	No	No	No	No	No	No	Yes	No	No	No informado	No
Yes	Masculino	Uber	186	95	Gabriela Leoni Petters	Yes	05847601913		Brasil				Branca	Paraná	Curitiba					41996719949	murilopetters@gmail.com	No	No		No	Yes	No	Yes	No	00/00/00	No		No	No	No	No	No	Yes	No	No	No	No	No	Yes	No	No	No	No informado	Yes
Yes	Feminino	Curitiba	170cm	77	Maria alicia duprat	Yes	05792151997		Brasil	Curitiba			Branca	PR	Curitiba					11975576421	Sophiadm@gmail.com	No	No		No	No	No	Yes	No	00/00/00	No		No	No	No	No	No	No	No	No	No	No	No	Yes	No	No	No	No informado	No
Yes	Masculino	Apositiveentado	174	73	Helena Gabardo Rocha	Yes	01653008920		Brasil	Curitiba			Branca	Pr	Curitiba	Rua padre anchietano	1205	Bigorrilho	80730000	41999761211	Olivirgabardo@gmail.com	No	No		No	Yes	No	Yes	No	13/09/2020	No		Yes	No	No	No	Yes	No	No	No	No	No	Yes	Yes	No	No	No	No informado	No
Yes	Masculino	Autonomo, em casa	1.68	80	Juraci Pereira Lafraia	Yes	31837964904		Brasil	Brasil			Branca	Paraná	Curitiba	Rua Alberto Schumann	33	São Bráz	82300670	41996058407	josecarloslafraia@gmail.com	No	No		No	No	No	No	No	00/00/00	No	36	No	No	No	No	No	No	No	No	No	No	No	No	No	No	No	No informado	No
Yes	Masculino	Rua João de Oliveira Passos, 536	177	78	Euridice Maria Esteves de Castro	Yes	05583107960		Brasil	Curitiba			Branca	Paraná	Curitiba	Rua Carlos Cavalcanti	19	Centro	80020-280	41988064779	decastroesteves@gmail.com	No	No		No	No	No	No	No	000000	No		No	No	No	No	No	No	No	No	No	No	No	No	No	No	No	No informado	No
Yes	Masculino	Sei de Cor	185cm	70	Sulamita Menot detectedes	Yes	05852503916		Brasil				Branca	Paraná	Curitiba	Rua cel Francisco de Paula Moura britto	618	Bacacheri	82520570	41992010818	fernanot detectedoweffort@gmail.com	No	No		Yes	Yes	No	Yes	No	00/00/0000	No		Yes	Yes	Yes	Yes	No	Yes	No	No	No	No	No	No	No	No	Yes	No informado	No
Yes	Feminino	Universidade Federal do Paraná/ Hospital de Clínicas	171cm	62	Genoefa Emilia Farias Prado	Yes	09891554988		Brasil				Branca	PR	Curitiba			Água Verde	80620-400	41985245988	leticiaeprado@gmail.com	No	No		Yes	No	No	Yes	Yes	28/02/2020	No		No	No	No	Yes	No	No	No	No	No	No	No	No	Yes	No	No	No informado	Yes
Yes	Feminino	Home Care de paciente com doença degenerativa (enfermeira)	170	78	Geni Farias	Yes	81575092972		Brasil				Branca	PR	Curitiba				80620-400	41984130493	leticiaeprado@gmail.com	No	No		No	No	No	Yes	No	000000	No		No	No	No	No	No	No	No	No	No	No	No	No	No	No	No	No	No
Yes	Feminino	Autônomo	157	102	Irene David Zilli	Yes	03170639951		Brasil	Curitiba	No tem		Ignorado	PR	Curitiba	Desembargador ernani guarita cartaxo	605	Capão raso	81130120	41999272433	mylla_75@yahoo.com.br	No	No		No	Yes	Yes	No	No	00/00/00	No		No	No	No	No	Yes	Yes	No	No	No	No	No	No	No	No	No	No informado	No
Yes	Masculino	UNIVERSIDADE FEDERAL DO PARANÁ	164	63	LInot detectedALVA DE SOUSA SILVA	Yes	60407675370		BRASIL				Branca	PARANÁ	CURITIBA	RUA JOSÉ DE MELLO BRAGA JÚNIOR	291	JARDIM DAS AMÉRICAS	81540280	41988662613	josevanot detectedo.sousa@gmail.com	No	No	Idade gestacional Ignorada	No	No	No	Yes	Yes	10/09/2020	No		No	Yes	Yes	Yes	No	No	Yes	No	No	No	No	No	No	No	Yes	No informado	Yes
Yes	Feminino	Casa	1.65	65	Iracema Fantin	Yes	40414213904		Brasil	Brasil			Branca	Paraná	Curitiba					41998245626	KarinaDS_L@hotmail.com	No	No		No	Yes	No	Yes	No	00/00/00	No		No	No	No	Yes	No	Yes	No	No	No	No	No	No	No	No	No	No informado	No
Yes	Masculino	Portaria	177	109	Inês grebos	Yes	97875392934		Brasil	Brasil			Branca	PR	Curitiba	Francisco Derosso	2370	Xaxim	81720_000	41998547808	amm.malinoski@hotmail.com	No	No		No	Yes	Yes	No	No	000000	No		No	No	No	No	No	No	No	No	No	No	No	No	No	No	No	No informado	No
Yes	Feminino	Estudante	162cm	65	Mileize David Zilli Ferreira	Yes	09579861900		Brasil	Curitiba			Ignorado	Pr	Curitiba	Rua desembargador ernani guarita cartaxo	605	Capão raso	81130120	04141999575911	zilli.milena@yahoo.com	No	No	Idade gestacional Ignorada	No	No	No	No	No	00/00/00	No		No	No	No	No	No	No	No	No	No	No	No	No	No	No	No	No	No
Yes	Feminino	Residencia	170	80	Paulina Farinhaque	Yes	32058900944		Brasil	Curitiba			Branca	PR	Curitiba	Rua Visconot detectede do Rio Branco	205	Mercês	80410001	998016436	elianefvelloso@gmail.com	No	No		No	No	No	No	Yes	09092020	No		No	Yes	No	Yes	No	Yes	Yes	No	Yes	Yes	No	No	Yes	No	No	No informado	Yes
No	Feminino	Pequeno Cotolengo	168	70	Maria de Lourdes da Silva	Yes	32848411805		Brasil				Branca	Paraná	Curitiba	O Brasil para Cristo	2683	Boqueirão	81650-110	987438301	enfermagem@pequenocotolengo.org.br	No	No		No	No	No	Yes	Yes	11/09/2020	No		Yes	Yes	No	No	Yes	Yes	No	No	No	No	No	No	No	No	No	No informado	No
No	Feminino	Pequeno Cotolengo	164	69	Deolinot detecteda Ramos Macedo	Yes	72904615920		Brasil				Parda	Paraná	Curitiba	Jeronimo Luiz Fernanot detectedes	106	Pinheirinho		998624316	enfermagem@pequenocotolengo.org.br	No	No		No	No	No	Yes	Yes	11/09/2020	No		Yes	Yes	No	Yes	Yes	Yes	No	Yes	No	No	No	No	No	No	No	No	No
Yes	Feminino	estudante	160	63	Marien Bittar Daher da Costa Ferreira	Yes	07817306940		brasil	curitiba			Branca	pr	curitiba	avenida silva jardim	1875	rebouças	80250200	41995337866	luaradaher@gmail.com	No	No		Yes	No	No	No	No	00/00/00	No		No	No	No	No	Yes	No	No	No	No	No	No	No	No	No	No	No informado	No
Yes	Feminino	Sou fotografa	1,70 cm	67	Lucile Maria Ribeiro Bittar Meyer	Yes	14908464847		Brasil	Curitiba			Branca	PR	Curitiba	Rua Silva Jardim	1875	Agua Verde	80250200	41997670986	mbdcosta20@hotmail.com	No	No		Yes	No	No	No	No	00/00/00	No		No	No	No	No	No	No	No	No	No	No	Yes	Yes	Yes	No	No	No informado	No
Yes	Feminino	Apositiveentado	1.65	75	Bernardino Costa Taques	Yes	11138866920		Brasil				Branca	Parana	Curitiba	Rua Buebos Aires	658	Batel	80250070	999911342	Mahorcostapr@hotmail.com	No	No		Yes	No	No	No	Yes	20/08/2020	No		Yes	No	No	No	Yes	No	Yes	No	Yes	Yes	Yes	No	No	No	No	No informado	Yes
Yes	Masculino	Home Ofice Autonomo	170cm	76	Flavia Godinho Tarasiuk	Yes	07343455931		Brasil				Branca	Paraná	Curitiba	Rua Saldanha Marinho	2127	Bigorrilho	80730-180	41988338998	guto@gutotarasiuk.com	No	No		Yes	No	No	No	No	00/00/00	No		No	No	No	No	No	No	No	No	No	No	No	No	No	No	No	No	No
Yes	Masculino	Aeronauta	181	77	Vera Helaine Angeli Benot detecteder	Yes	05555038950		Brasil				Branca	Paraná	Curitiba	Rua José Clementino Bettega	120	Capao Raso	81130020	41999910016	joaoquinto@yahoo.com.br	No	No		No	No	No	Yes	No	00/00/00	No		No	No	No	No	No	No	No	No	No	No	No	No	No	No	No	No informado	No
Yes	Feminino	Voluntariado no Hospital Erasto Gaertner e na Secretaria Municipal de Saúde	164cm	54	Leila Caroline Souza Reis	Yes	45578199828		Brasil				Branca	PR	Curitiba					11971395456	leilareis08@gmail.com	No	No		No	No	No	Yes	No	05/09/2020	No		No	Yes	No	No	Yes	Yes	No	No	No	No	No	No	No	No	No	No	No
Yes	Masculino	MadeiraMadeira	185cm	97	Francina Josina Elisabeth Tange Alberts	Yes	05271241920		Brasil				Branca	PR	Curitiba	Rua XV de Novembro	2061	Alto da XV	80045125	41999021885	marco_alberts123@hotmail.com	No	No		No	No	No	No	No	01/09/2020	No		No	No	No	No	No	Yes	No	No	No	No	No	No	No	No	No	No informado	No
Yes	Masculino	Azul Linhas Aereas	175	79	Adriane Luciete Ferrarini	Yes	08579507979		Brasil		FP823466		Branca	Paraná	Curitiba	Rua Mariano Gardolinski	165	Santa Cânot detectedida	82640030	41999735334	pluizgustavop@gmail.com	No	No		Yes	Yes	Yes	No	No	00/00/00	Yes	36.5	No	No	No	No	No	Yes	No	No	No	No	No	No	No	No	No	No	No
Yes	Feminino	UFPR	1.57	65	Yesone de Lima Szlichta	Yes	07092136970		Brasil				Branca	PR	Curitiba	Rua Cambará	266	Juvevê	80030380	41998671177	Luana.lima.szlichta@gmail.com	No	No		No	No	No	Yes	Yes	11/09/20	No		Yes	Yes	No	No	Yes	No	No	No	No	No	No	Yes	Yes	No	No	No	Yes
Yes	Feminino	Nenhum.	167	91	Marien bittar daher da costa ferreira	Yes	07817252912		Brasil				Branca	Parana	Curitiba	Avenida silva jardim	1875	Agua verde	80250200	41995992243	vitoriacdaher@gmail.com	No	No		No	Yes	No	Yes	No	00/00/00	No		No	No	No	No	No	No	No	No	No	No	No	No	No	No	No	No	No
Yes	Feminino	Aeroclube do Parana	1.73	68	Djanira de Almeida	Yes	70033102953		Brasil				Branca	Pr	Curitiba	Mariano gardolinski	165	Santa Canot detectedida	82640030	999074523	adrianefera@hotmail.com	No	No		No	No	No	No	No	09/07/2020	No		Yes	Yes	Yes	No	No	Yes	Yes	Yes	No	No	Yes	Yes	Yes	No	No	No informado	Yes
Yes	Feminino	Do lar	160	76	Joana Mengual Menot detectedes	Yes	01529834813		Brasil	Curitiba			Branca	Paraná	Curitiba					41996370887	gomes7@gmail.com	No	No		No	Yes	Yes	No	No	00/00/00	No		No	No	No	No	No	No	No	No	No	No	No	No	No	No	No	No informado	No
Yes	Masculino	Obra (construção civil)	178	80	Dulcine Melo Chicoski	Yes	08826168970		Brasil				Branca	PR	Curitiba	Rua Arthur Manoel Iwersen	755	Boqueirão	81750240	41998449070	christianchicoski@gmail.com	No	No		Yes	Yes	Yes	No	No	00/00/00	No		No	No	No	No	No	No	Yes	No	No	No	No	No	No	No	No	No informado	No
Yes	Feminino	Central de leitos	158	78	Esther Methilde Pin Nicareta	Yes	81767030959		Brasil	Curitiba			Branca	Pr	Curitiba	Rua Guilherme Pugsley	1959	Água Verde	80620000	41999575980	smnicaretta@onot detecteda.com.br	No	No		No	Yes	Yes	No	No	000000000	No		No	No	No	No	Yes	No	No	No	No	No	No	No	No	No	No	No	No
Yes	Feminino	Empresa top mix	165cm	65	Ivone Rodrigues lopes	Yes	87574500991		Brasil	Curitiba			Branca	Parana	Curitiba	Ernani guarita cartaxo	608	Capão raso	81130120	995690376	Rosana.lopes@topmixcuritiba.com.br	No	No		Yes	Yes	No	No	No	00/00/00	No		No	No	No	No	Yes	Yes	Yes	No	No	No	No	No	No	No	No	No informado	No
Yes	Feminino	Escritorio	160cm	57	Franciele Fontana	Yes	07922082932		Brasil				Branca	PR	Curitiba	Rua Padre Agostinho	2715	Bigorrilho	80710000	41999767199	marialuisafontana@hotmail.com	No	No		No	No	No	No	No	00/00/00	No		No	No	No	No	No	No	No	No	No	No	No	No	No	No	No	No informado	No
Yes	Masculino	Autônomo	185cm	82	Lira longo do nascimento	Yes	87447690910		Brasil	Curitiba			Branca	Paraná	Curitiba	Desembargador Ernani guarita cartaxo	608	Capão raso	81130120	999503907	Jeffersongames@yahoo.com.br	No	No		Yes	Yes	No	No	No	00/00/00	No		No	No	No	No	No	Yes	Yes	No	No	No	No	No	No	No	No	No informado	No
Yes	Masculino	Curitiba PR	174	90	Idalina Furlan Testa	Yes	01585948942		Brasil				Branca	PR	Curitiba	Rua Coronel Ary Pinho	581	Boa Vista	82650070	41991130571	silvanotesta@yahoo.com.br	No	No		No	Yes	Yes	No	No	20/08/2020	No		No	Yes	No	No	No	Yes	No	No	No	No	No	No	No	No	No	No	No
Yes	Feminino	Escritório	158	54	Izabel Celina Granot detectedo Borzi	Yes	39298549881		Brasil	Brazil			Branca	PR	Curitiba	Rua João Dranka	66	Cristo rei	80050530	41996412805	rayra_granot detectedo@hotmail.com	No	No		Yes	No	No	No	No	00/00/00	No		Yes	Yes	No	No	Yes	Yes	Yes	No	No	No	No	No	No	Yes	No	No informado	No
Yes	Feminino	Autônoma	169	56	Rosana Geraldo Lopes do nascimento	Yes	08806847988		Brasil				Branca	Paraná	Curitiba	Desembargador Ernâni guarita cartaxo	608	Capão raso	81130120	41999540734	Thaiscnascimento1@gmail.com	No	No		No	No	No	No	No	000000	No		No	No	No	No	No	No	No	No	No	No	No	No	No	No	No	No informado	No
Yes	Masculino	Sinq Administradora de Conot detectedomínios	173cm	93	Maria Honória da Silva	Yes	37516485934		Brasil				Branca	Pr	Curitiba	Rua José Zaleski	1502	Capão Raso	81312110	41992418636	roberto.olivio@gmail.com	No	No		No	No	No	No	No	00/00/00	No		No	No	No	No	No	No	No	No	No	No	No	No	No	No	No	No informado	No
Yes	Feminino	Do lar	1.63	58	Alice de Anot detectedrade Garcia	Yes	92163017915		Brasil				Branca	Pr	Curitiba	Rua José Zaleski	1502	Capão Raso	81312110	41992430824	soudaverinha@gmail.com	No	No		No	No	No	No	No	00/00/00	No		No	No	No	No	No	No	No	No	No	No	No	No	No	No	No	No informado	No
Yes	Masculino	PUCPR	192cm	102	Eugenia Silene Nadolny Palma	Yes	02379304980		Brasil	Brasil			Branca	Parana	Curitiba	Rua Sete de Abril	1255	Juvevê	80040120	41991197830	juliocp1978@gmail.com	No	No		No	No	No	No	No	00/00/00	No		No	No	No	No	Yes	Yes	Yes	No	No	No	No	No	No	No	No	No informado	No
Yes	Feminino	Secretaria da Educaçao	1.64	102	Ana Morva	Yes	02548905985		Brasil	Curitiba			Branca	Paraná	Curitiba	Alameda presidente taunay	970	Bigorilho	80430000	992888001	aninhamorva@yahoo.com.br	No	No		Yes	No	No	No	No	000000	No		No	No	No	No	No	No	Yes	No	Yes	No	No	No	No	No	Yes	No informado	No
No	Masculino	Secretaria Estadual de Saúde	167 cm	70	Therezinha de Freitas Anot detectedersen	Yes	53051637904		Brasil	Brasil			Branca	PR	Curitiba	R. Atilio Bório	119	Cristo Rei	80050-250	41991466493	marcos.anot detectedersen@sesa.pr.gov.br	No	No		No	Yes	Yes	No	Yes	10/09/2020	Yes	37	No	Yes	No	Yes	No	Yes	Yes	No	No	No	Yes	No	Yes	No	No	No	No
No	Masculino	Bombeiro Militar	1.69	78	Eliane Aparecida Bello	Yes	03712243901		Brasil	Curitiba	No		Branca	PR	Curitiba	Rua maranhão	1890	Portão	80610001	41997417008	michael.fabiano@hotmail.com	No	No		No	No	No	No	Yes	04/09/2020	No	No	No	No	No	No	Yes	Yes	Yes	No	Yes	No	Yes	No	No	No	No	No informado	No
Yes	Feminino	SEDU	1.72	70	Luiza Brunati da silva	Yes	87327546987		Brasil	Brasil			Branca	PR	Curitiba	Rua da gloria	425	Centro civico	80030060	41996150211	marilaneafs@gmail.com	No	No		No	Yes	Yes	No	No	05092020	No		No	No	No	No	Yes	No	No	No	No	No	No	No	No	No	No	No informado	No
No	Masculino	sedu	177	94	angelina hrysay	Yes	03883462993		brasil				Branca	pr	sao josé dos pinhais	rua espirito santo	483		83025330	41999044094	vhrysay@msn.com	No	No		No	Yes	Yes	No	No	0000000000000000	No		No	No	No	No	No	Yes	Yes	No	No	No	No	No	No	No	No	No informado	No
	Masculino	SEAB			Vitória Zanatta	Yes	23156287920		Brasil											41	nortigara@seab.pr.gov.br
Yes	Feminino	Autônoma - Granot detected Pilates	167cm	63	Ana Marlene Santos de Armas	Yes	05421409937		Brasil	Brasil	Yes		Ignorado	PR	Curitiba	Rua João Maria Leanot detectedro	112	Uberaba	81560300	41996300910	camila.armas@hotmail.com	No	No		No	No	No	No	Yes	15/09/2020	No		Yes	Yes	No	Yes	Yes	Yes	Yes	No	No	No	No	No	No	No	No	No informado	No
Yes	Masculino	Estudante	174	66	Mara Lilian Ortega Fuzetti	Yes	10925737984		Brasil				Branca	Paraná	Curitiba	Rua Miguel fiori	146	Pilarzinho	82120020	41987309992	joaopedrofuzetti@gmail.com	No	No		Yes	No	No	No	No	00/00/00	No		No	No	No	No	No	No	Yes	No	No	No	No	No	No	No	No	No informado	No
Yes	Masculino	Lanchonete	170cm	83	Shirley Moras	Yes	06954130907		Brasil				Parda	PR	Curitiba		51	Cic	81310070	41997970050	giilvn3@hotmail.com	No	No		No	Yes	Yes	No	Yes	14/09/2020	No		Yes	No	Yes	Yes	No	Yes	No	No	No	Yes	Yes	No	Yes	No	Yes	No informado	Yes
Yes	Feminino	Do lar	175cm	67	Vera Lucia Murbach	Yes	029.519.969-50		Brasil				Branca	Pr	Curitiba	Senador accioly filho	720	Cic	81310000	41997664250	franpinheitosantana@hotmail.com	No	No		Yes	No	No	No	Yes	14/09/2020	No		No	Yes	No	Yes	Yes	Yes	Yes	No	No	No	No	No	Yes	No	Yes	No informado	Yes
No	Feminino	Escola de Saude Publica	162	54	Rita de Cassia Gaspar dos Santos	Yes	04970555974		Brasil	Curitiba			Parda	Parana	Curitiba	Rua Urbano lopes	212	Cristo REi		16982621415	danielle.santos@sesa.pr.gov.br	No	No		Yes	No	No	Yes	Yes	12/09/20	No		Yes	Yes	No	No	Yes	Yes	Yes	No	No	No	No	No	No	No	No	No informado	Yes
Yes	Masculino	CÂMARA MUNICIPAL DE CURITIBA	175	106	marcia cristina salgado	Yes	10005427932		brasil	Curitiba			Branca	PR	Curitiba	rua evaristo da veiga	2910	Xaxim	81670460	41998349098	gsalgado1997@hotmail.com	No	No		No	No	No	No	Yes	14/09/20	No		Yes	Yes	No	Yes	Yes	No	Yes	No	No	No	No	No	No	No	No	No informado	No
Yes	Feminino	Apositiveentada	152 cm	72	Luiza Vaz Menot detectedes	Yes	53579852949		Brasil	Curitiba			Branca	Pr	Curitiba	Rua Leonardo javorski	100	Santa Amelia	81330480	41996761497	zenymmoraes@hotmail.com	No	No		No	Yes	No	No	Yes	14/09	Yes	36	Yes	No	No	Yes	Yes	No	No	No	No	No	Yes	Yes	No	No	No	No informado	Yes
Yes	Masculino	Particular ,autonomo	1.8	80	Maria Luiza alves	Yes	02706133902		Brasil	Brasil	Nao		Branca	Paraná	Curitiba	Casa	810	Jardim botanico	80210-300	997219202	Geraldoalves28@hotmail.com	No	No	Idade gestacional Ignorada	No	Yes	Yes	No	Yes	11/09/2020	Yes	37.1	Yes	Yes	No	Yes	Yes	Yes	Yes	No	No	No	Yes	Yes	Yes	No	No	No informado	Yes
No	Feminino	No estou trabalhanot detectedo	169 cm	78	Izabel Osiecki	Yes	99717913900		Brasil				Branca	PR	Curitiba					996277844	claudiadiniz_@outlook.com	No	No		Yes	No	No	No	Yes	13/09/2020	No		Yes	Yes	No	No	Yes	Yes	Yes	No	No	Yes	No	No	Yes	No	No	No informado	Yes
Yes	Feminino	apolar imoveis	170	68	nelci bernardes da silva anghewiche	Yes	04544385911		Brasil	Brasil			Branca	PR	curitiba	rua maria de souza	80	uberaba	81550-310	41999071220	denise1.imovel@gmail.com	No	No		No	No	No	No	Yes	14/09/2020	No		Yes	No	Yes	Yes	Yes	No	Yes	No	Yes	Yes	Yes	No	Yes	No	No	No informado	No
Yes	Feminino	Permution	1.58	89	Leocádia monteiro	Yes	87685663953		Rua senador Accioly Filho.585	Curitiba			Branca	Pr	Curitiba	Rua senador Accioly Filho	585	Novo munot detectedo	8131000	41988350676	Joelmamartins2009@hotmail.com	No	No		No	Yes	Yes	Yes	Yes	10/09/20	No		No	Yes	Yes	Yes	No	Yes	No	No	No	No	Yes	No	No	No	No	No informado	Yes
Yes	Feminino	Podóloga	1.68	67	Maria lucia Monteiro de baura	Yes	7554426958		Brasil				Branca	Paraná	Curitiba	Rua jornalista Renato ribas	123	Butiatuvinha	82400395	41995488544	smonteirodebaura@gmail.com	No	No		No	Yes	Yes	No	Yes	13/09/2020	No		No	Yes	No	Yes	Yes	Yes	Yes	No	Yes	Yes	No	No	Yes	Yes	Yes	No informado	Yes
Yes	Feminino	Controladoria Geral do Estado	173 cm	65	Maria Elizabethe Muller Gonçalves	Yes	04829624965		Brasil				Branca	PR	Curitiba	Dante Luiz Junior	581	Capão Raso	81020720	41984376704	anot detectedressamg@cge.pr.gov.br	No	No		No	Yes	No	No	No	00/00/00	No		No	No	No	No	No	No	No	No	No	No	Yes	No	No	No	No	No informado	No
Yes	Masculino	desempregado	165cm	62	Carmen Ferreira Gomes	Yes	04338099143		Brasil	Brasil			Branca	PR	Curitiba	Rua Marechal Deodoro	3009	Alto da XV	80045375	67992629203	vitorgomesleite@gmail.com	No	No		No	No	No	No	Yes	14/09/2020	No		Yes	Yes	No	No	No	No	No	No	No	No	No	No	No	Yes	No	No informado	Yes
Yes	Masculino	Congregação Evangélica Luterana São Paulo	1.8	95	Sueli Schneider Krause	Yes	09765512929		Brasil	Curitiba			Branca	Paraná	Curitiba	Rua Maria Yeseão Bettega	254	Novo munot detectedo	81010350	41997805652	silas.krause@gmail.com	No	No		Yes	Yes	Yes	Yes	Yes	11/09/2020	Yes		No	Yes	Yes	Yes	Yes	Yes	Yes	No	No	No	No	Yes	Yes	Yes	Yes	No informado	Yes
Yes	Feminino	COHAB Curitiba	172	809	Sanot detectedra Regina dos Santos	Yes	07587760989		Brasil				Parda	PR	Curitiba	Rua Luiz França	1628	Cajuru	82940090	41991075597	amanot detectedasvfelix@gmail.com	No	No		Yes	Yes	Yes	No	Yes	14092020	No		No	Yes	Yes	Yes	Yes	No	Yes	No	No	No	No	No	No	No	Yes	No informado	No
Yes	Masculino	Uber	1.93	115	Maria Eglair Bini Dalcuche	Yes	39385337904		Brasil				Branca	Paraná	CURITIBA	R cyrillo Merlin	502	Novo Munot detectedo	81010360	999941869	Dalcuche@gmail.com	No	No		No	Yes	Yes	No	Yes	14/09/2020	Yes	38	Yes	Yes	No	Yes	Yes	Yes	Yes	No	No	No	No	No	Yes	No	No	No informado	Yes
Yes	Feminino	Do lar	156	66	Silmara moura piccolo Soares	Yes	13487852926		Brasil				Branca	Pr	Curitiba	Rua Lourdes betezek	489	Cidade Inot detectedustrial	81460356	41997475597	Amanot detectedapiccolo1@hotmail.com	No	No		No	Yes	Yes	No	Yes	07092020	No		Yes	Yes	Yes	Yes	Yes	Yes	Yes	No	No	No	No	No	Yes	Yes	Yes	No informado	Yes
Yes	Feminino	Olist, home office	155	75	sanot detectedra mara figueiredo de souza	Yes	04204386962		brasil				Branca	paraná	curitiba	avenida senador salgado filho	2161	guabirotuba	815100001	41999828643	jamille.figueiredo.s@gmail.com	No	No		No	Yes	Yes	Yes	Yes	10092020	No		No	Yes	No	Yes	Yes	Yes	Yes	No	No	No	No	No	No	No	No	No informado	No
Yes	Masculino	CTER RENASCER	179cm	60	Isabel do Carmo lopes	Yes	37358110862	Criança até 12 anos	Brasil	Curitiba			Preta	PR	Curitiba	Rua Iapó	1760	Prado Velho		41996156215	fernanot detectedo_ss.uel@hotmail.com	No	No		Yes	No	No	No	Yes	12/09/2020	Yes	36.3	Yes	Yes	Yes	Yes	Yes	Yes	Yes	No	Yes	No	No	No	No	No	No	Yes	No
Yes	Feminino	PMPR	164	59.5	Nadir Dias Dantas Trevisan	Yes	02078306908		Brasil				Branca	Paraná	Curitiba	Rua 31 de Março	2750	Pinheirinho	81150280	41996191296	mdtrevis@yahoo.com.br	No	No		No	No	No	Yes	Yes	04/09/20	No		Yes	No	No	No	Yes	Yes	No	No	No	No	No	No	No	No	No	No informado	Yes
Yes	Feminino	Do lar	1,65cm	85	Emília Pedroso Hasse	Yes	46286829920		Brasil	Curitiba			Branca	Pr	Curitiba	Rua José de Alencar	161	Cristo rei	80050240	41991484786	supplylumber@gmail.com	No	No		No	No	No	No	Yes	06/09/20	No		Yes	No	Yes	Yes	No	Yes	No	No	No	No	No	No	Yes	No	No	No informado	No
Yes	Masculino	Unidade de Saúde Martinópolis	168	73	Elizabeth Witek Martins	Yes	06124269988		Brasil	Curitiba		706202588340662	Branca	PR	Curitiba	Dias da Rocha Filho	489	Alto da XV	80045275	41988339302	guiwm@hotmail.com	No	No		No	Yes	Yes	Yes	No	00/00/00	No		No	No	No	No	No	No	No	No	No	No	No	No	No	No	No	No	No
Yes	Feminino	Do lar	168cm	72	Janete Alves Thachechem	Yes	09136038997		Brasil				Branca	PR	Curitiba	Rua Doutor Bley Zorning	2977	Boqueirão	81750430	985063229	anathachechem@hotmail.com	No	No		Yes	Yes	No	No	Yes	13/09/2020	No		No	Yes	No	Yes	No	Yes	No	No	No	No	No	No	No	No	No	No informado	No
Yes	Masculino	Proprio	193	92	Rejane Linhares Rocha Megda	Yes	07633813903		Brasil	Brasil			Ignorado	Pr	Curitiba	Rua Dr Bley Zorning	2977	Boqueirão	81750-430	41988610616	kelvinroch@gmail.com	No	No		Yes	No	No	No	Yes	13/09/2020	Yes	38	Yes	Yes	No	Yes	Yes	No	No	No	No	No	Yes	No	Yes	No	No	No	No
Yes	Masculino	Autonomo	171	74	Maria de Barros Nunes	Yes	38712610259		Brasil				Parda	PR	Curitiba	R. Otilia de jesus carlins	35	Sitio cercado	81925590	41987659460	jcbaness@gmail.com	No	No		No	Yes	No	No	Yes	12/09/20	No		No	No	No	No	No	No	No	No	Yes	Yes	No	No	No	No	No	No informado	No
Yes	Feminino	Silvia Rocha Estética avançada	164cm	59	Roseli Aparecida Vidal	Yes	05664770929		Brasil				Parda	Paraná	Curitiba	Rua Maria B. Chanoski	244	Orleans	82310300	41996916144	carolinet.santos.cs@gmail.com	No	No		No	No	No	No	Yes	16/09/2020	No		No	Yes	No	Yes	Yes	Yes	Yes	No	No	No	No	Yes	Yes	Yes	No	No informado	Yes
		SudaCall Call Center					´05270798980													41 9918-0677	capeleto@gmail.com								Yes				Yes					Yes				Yes
		Atlas Copco Brasil Ltda					´05160802967													41 99142-6936	fernanot detectedamla27@gmail.com						Yes		No
Yes	Feminino	SESA	160	96	Olivina Aparecida de Souza Moreira	Yes	03500676944		Brasil	Curitiba			Branca	Pr	Curitiba	Francisco Sarot	555	Tatuquara	81480030	41998496953	francelina@sesa.pr.gov.br	No	No		No	No	No	No	Yes	17/09/2020	Yes	37	No	Yes	No	No	No	Yes	No	No	No	No	No	No	Yes	No	No	No informado	No
Yes	Feminino	SESA	159	75	Roza Keller	Yes	41420730959		Brasil	Curitiba			Branca	Paraná	Curitiba	Rua Brigadeiro Franco	3150	Centro	80.250-030	999091631	marildakeller@gmail.com	No	No		Yes	No	No	No	No	No se aplica	No		No	No	No	No	No	Yes	No	No	No	No	No	No	No	No	No	No informado	No
Yes	Masculino	SEDU PALACIO DAS ARAUCARIAS	1.84	97	Ivete Morales Di Luca	Yes	01868084965		Brasil	Paraná			Branca	Paraná	Curitiba	Rua Professor Pedro Viriato Parigot de Souza	3155	Mossungue	81200100	41991458035	dilucahenrique@gmail.com	No	No		No	Yes	Yes	No	Yes	15/09/2020	No		Yes	Yes	No	No	No	No	No	No	No	No	No	No	No	No	No	No	No
Yes	Feminino	PIZZARIA	157cm	94	LUZIA PINHEIRO DOS REIS	Yes	02679407938		BRASIL		No positiveSUI		Branca	PARANÁ	CURITIBA	RUA DOUTOR ESTEVAM RIBEIRO DE SOUZA NETTO	563	CAJURU	82900060	41998266035	carolinetabalipa683@gmail.com	No	No		No	No	No	No	Yes	13/09/2020	No		Yes	Yes	No	Yes	Yes	Yes	Yes	No	No	No	No	No	Yes	No	No	No informado	No
Yes	Feminino	Autonoma	163cm	73	Maria Afra Ferreira Pinto	Yes	86082256972		Brasil	Curitiba			Branca	Paraná	Curitiba	Rua cidade de Missal	133	Atuba	82850070	41984462296	motekmone@hotmail.com	No	No		No	Yes	No	Yes	Yes	12/09/2020	No		Yes	Yes	No	No	No	Yes	No	No	Yes	No	No	No	No	No	No	No informado	No
Yes	Feminino	Casa	163	72	Elza Joay Durki	Yes	04473860930		Brasil				Branca	Parana	Curitiba		280	Umbara	81940502	41995704066	viviane.durki@gmail.com	No	No	Idade gestacional Ignorada	No	Yes	Yes	No	No	00/00/00	No		No	No	No	No	No	Yes	No	No	No	No	No	No	No	No	No	No informado	No
Yes	Feminino	Nao trabalho	170cm	70	Florinete Schneider klietzke	Yes	06475650994		Brasil	Curitiba	Nao tem		Branca	PR	Curitiba	Rua Almirante Tamanot detectedaré	1535	Juveve	80040-110	41987676066	babi.instrumentadora@gmail.com	No	No		No	No	No	No	Yes	15/09/2020	No		No	No	No	No	Yes	Yes	No	No	No	No	Yes	No	Yes	No	No	No informado	No
Yes	Masculino	Alameda doutor Carlos de carvalho 417	190cm	108	Glaucia Santa Cestari	Yes	73376353115		Brasil				Branca	PR	Curitiba	Rua José de Alencar	20	Cristo rei	80050240	41999983129	caio_penasso@hotmail.com	No	No		No	Yes	No	No	No	00/00/00	No		Yes	No	No	No	No	Yes	No	No	No	No	No	No	No	No	No	No informado	No
Yes	Masculino	Técnico Instalador	178cm	80	Vanessa Cristina de Souza	Yes	10654341974		Brasil	Brasil			Branca	PR	Curitiba				80630060	41997838975	guiislip@hotmail.com	No	No		No	Yes	No	No	Yes	15/09/2020	Yes	37.1	Yes	Yes	No	Yes	Yes	Yes	Yes	No	Yes	No	No	No	No	No	No	No	Yes
Yes	Feminino	Do Lar	154cm	57	Ortencia Aparecida da Roza	Yes	09312284924		Brasil				Branca	PR	Curitiba					41995037559	anne_lopespereira@hotmail.com	No	No		No	Yes	No	No	Yes	14/09/2020	No		Yes	Yes	No	No	Yes	No	Yes	No	No	No	No	No	No	No	No	No	No
Yes	Feminino	Desempregada	158	80	Terezinha Wiggers Xavier	Yes	02280684950		Brasil	Curitiba			Branca	Paraná	Curitiba	Rua Frederico Stella	400	Cachoeira Pr	82710412	41992149508	Cris_rx@hotmail	No	No		No	Yes	No	No	Yes	13/09/20	No		Yes	Yes	Yes	No	No	Yes	No	No	No	No	No	No	No	No	No	No informado	No
Yes	Masculino	Curitiba	187cm	78	Geralda Barros dos Santos	Yes	26077608874		Brasil				Preta	PR	Curitiba					41998847229	glauciobsantos@gmail.com	No	No		No	Yes	Yes	No	Yes	08/09/2020	Yes	37	Yes	No	No	No	No	No	No	No	No	No	No	No	No	No	No	No informado	No
Yes	Feminino	SEDU	165	63	GREICY MERY BRONHOLO	Yes	08902825957		BRASIL				Branca	PARANA	CURITIBA	Rua Antonio Moreira Lopes	725	cajuru	82980100	41987527158	nelson.riomoveis@gmail.com	No	No		No	Yes	Yes	No	Yes	15/09/2020	No		Yes	Yes	No	Yes	Yes	Yes	No	No	No	No	Yes	No	Yes	No	No	No informado	Yes
Yes	Masculino	Salão de Beleza Torriton	165cm	57	Elisabete Bonázio	Yes	38357707807		Brasil				Branca	Paraná	Curitiba					41992010327	Duartte.Marcos@gmail.com	No	No		No	Yes	Yes	No	No	00/00/00	No		No	No	No	No	No	No	No	Yes	No	No	Yes	No	Yes	No	No	No	No
Yes	Feminino	Em casa, babà	166cm	68	Viviane Aparecida Durki	Yes	12350719952		Brasil				Branca	Paraná	Curitiba		280	Umbara	81940502	41997600700	laridurki100@gmail.com	No	No	Idade gestacional Ignorada	No	No	No	No	No	00/00/00	No		No	No	No	No	No	No	No	No	No	No	No	No	No	No	No	No informado	No
Yes	Feminino	Casa	170cm	65	Janete do Rocio da Cruz	Yes	04602758959		Brasil	Curitiba			Branca	Paraná	Curitiba		578	Umbara	81940504	41995916029	Cristiane	No	No		No	Yes	Yes	No	No	00/00/00	No		No	No	No	No	No	No	No	No	No	No	No	No	No	No	No	No informado	No
Yes	Feminino	Doméstica	156	59	Idazilma de Paula Bonfim	Yes	08362062908		Brasil	Curitiba			Parda	Paraná	Curitiba	Miguel Ângelo pellanot detecteda Travessa	6	Umbara	81940502	41995658850	paulabonfim014@gmail.com	No	No		No	Yes	Yes	No	Yes	09092020	No		Yes	Yes	No	No	No	No	No	No	No	No	Yes	No	No	No	No	No informado	No
Yes	Feminino	Centro Universitário do Brasil - Unibrasil	1.64	88	Etelvina Carmen Teixeira	Yes	02129640974		Brasil	Brasil			Branca	PR	Almirante Tamanot detectedaré	Rua Justo Manfron	920	Lamenha Pequena	83508185	41999571900	adrianacrschier@uol.com.br	No	No		No	No	No	No	Yes	09/09/2020	No		Yes	Yes	No	Yes	Yes	Yes	Yes	No	Yes	Yes	Yes	No	No	No	No	No informado	Yes
Yes	Feminino	CRIE	1.7	80	Jasmira Rosa da Silva de Oliveira	Yes	02714597947		Brasil	Colombo		707700651495410	Preta	Pr	Colombo	Francisco kania	167	Ana terra	83406070	41988958063	miriahmoragon@gmail.com	No	No		No	Yes	Yes	Yes	Yes	17/09/20	No		Yes	Yes	Yes	Yes	Yes	Yes	Yes	No	Yes	No	Yes	No	Yes	Yes	No	No informado	Yes
Yes	Masculino	Apositiveentado	181	82	Laura Vieira Belém	Yes	28015975115		Brasil				Branca	Parana	Curitiba	Rua baltazar carrascodos reis	2753	Agua verde	80250130	41999126780	Belemtri@hotmail.com	No	No		No	Yes	No	Yes	No	000000	No		No	No	No	No	No	No	No	No	No	No	No	No	No	No	No	No informado	No
Yes	Feminino	PMC - Escola Municipal São Luiz	159cm	53	Elita Bier	Yes	03291957946		Brasil				Branca	Paraná	Curitiba	Rua João Rodolfo Schlenker	359	Água Verde	80620030	41991113893	anybier@hotmail.com	No	No		No	No	No	No	No	00/00/00	No		No	No	No	No	Yes	Yes	Yes	No	No	No	No	No	No	No	No	No informado	No
Yes	Feminino	Estudante	170	58	Terezinha Pietchaki Levanot detectedoski Ceccon	Yes	08780403905		Brasil				Branca	PR	Curitiba	Rua Libero Aguiar	83	Pilarzinho	82115510	41996910002	anot detectedressacecc@gmail.com	No	No		No	No	No	No	No	0000	No		No	No	No	No	No	No	No	No	No	No	No	No	No	No	No	No informado	No
Yes	Feminino	Centro	165	61	Christiane Werner Ferreira Primo	Yes	05694520904		Brasil	Brasil			Branca	Paraná	Curitiba	Sete de setembro	3815	Rebouças	80230010	41997194116	amanot detectedaafprimo@hotmail.com	No	No		No	No	No	No	No	00/00/0000	No		No	No	No	No	No	Yes	No	No	No	No	No	No	No	No	No	No informado	No
Yes	Feminino	Jm cálculos	158	52	Cristiane Werner Ferreira Primo	Yes	05694527917		Brasil				Branca	PR	Curitiba				80230010	41996717880	isabella.fprimo@gmail.com	No	No		No	No	No	No	No	00/00/00	No		No	No	No	No	No	Yes	No	No	No	No	No	No	No	No	No	No informado	No
Yes	Masculino	Escola	181	90	Debora Regina de Oliveira Machado	Yes	13061061924		Brasil				Branca	Paraná	Curitiba					997456307	marino7032@gmail.com	No	No		No	Yes	Yes	Yes	No	00/00/00	No		No	No	No	No	No	No	No	No	No	No	No	No	No	No	No	No informado	No
Yes	Feminino	Desempregada	153cm	66	Iolanot detecteda Yesões	Yes	87716771949		Brasil	Curitiba			Branca	PR	Curitiba	Rua Capitão Leônidas Marques	1746	Uberaba	81550000	41997202887	ClaudianeYesoes27@hotmail.com	No	No		No	No	No	Yes	Yes	11/09/2020	Yes		Yes	Yes	No	No	No	No	No	No	Yes	Yes	Yes	No	Yes	No	No	No	Yes
Yes	Masculino	BMK Buffet Infantil	165cm	68	Cenira da Aparecida Pinheiro	Yes	02753519986		Brasil				Branca	Parana	Curitiba	Rua Manoel das chagas lima	460	São Braz	82300350	41992438914	paulopinheirocircuito@gmail.com	No	No		No	Yes	Yes	No	No	00/00/00	No		No	No	No	No	No	Yes	No	No	No	No	Yes	Yes	No	No	No	No informado	Yes
Yes	Feminino	Risotolanot detectedia Inot detected e com de alimentos Ltda	163cm	60	Elvira de Souza Pereira	Yes	02952755965		Brasil				Parda	PR	Curitiba	Rua Deputado Cunha Bueno Bloco A Apt 102	489	Cidade Inot detectedustrial	81450-320	41991312928	karinypereira@yahoo.com.br	No	No		No	No	No	No	No	00/00/00	No		No	No	No	No	No	No	No	No	No	No	No	No	No	No	No	No	No
Yes	Feminino	Bradesco	160	57	Rosane elisabete Marmitt	Yes	09352319940		Brasil	Curitiba			Branca	Paraná	Curitiba	Rua dr Manoel Francisco ferreira correia	441	Portao	81320260	41999076397	Carol120299@hotmail.com	No	No		No	Yes	Yes	No	Yes	14/09/2020	No		No	Yes	No	Yes	Yes	Yes	No	No	No	No	No	No	Yes	No	No	No informado	No
Yes	Feminino	Hospital de Clínicas-UFPR	176	74	Eliana Cardoso	Yes	69474672172		Brasil				Branca	PR	Curitiba	Rua Ubaldino do Amaral	337	Alto da Gloria	80060195	41992193421	lorenacmc@hotmail.com	No	No		Yes	Yes	Yes	Yes	No	Sem sintomas	No		No	No	No	No	No	Yes	Yes	No	No	No	No	No	No	No	No	No	No
Yes	Feminino	SAMU e Siate	167 cm	57	Carmen Lúcia Cecyn Bezerra Menot detectedes de Oliveira	Yes	03272348905		Brasil				Branca	Paraná	Curitiba	Rua Coronel Ottoni Maciel	491	Vila Izabel	80.320-000	41999124070	deiaoliveira@hotmail.com	No	No		No	Yes	Yes	No	No	00/00/00	No		No	No	No	No	No	No	No	No	No	No	No	No	No	No	No	No informado	No
Yes	Masculino	Dreamlanot detected	1.74	71	Cinira da Aparecida Pinheiro	Yes	00774701927		brasil				Parda	Parana	Curitiba	Arthur Manoel Iwersen	550	boqueirao	81750240	41992828042	guilhermenaweb@hotmail.com	No	No		Yes	Yes	Yes	No	No	000000	No		No	No	No	Yes	No	Yes	No	No	No	No	No	No	No	No	No	No informado	No
Yes	Masculino	Softmarketing	178	66	Maria de Lourdes Deczka	Yes	05248777933		Brasil	Curitiba			Branca	PR	Curitiba				80610-290	41984000026	jdeczka@gmail.com	No	No		Yes	No	No	Yes	Yes	10/09/2020	Yes	37.6	No	Yes	No	Yes	No	Yes	Yes	No	Yes	Yes	No	Yes	No	No	No	No informado	No
No	Masculino	Colégio Avelino Antônio Vieira	176	66	Sirlei Aparecida Barboza	Yes	07346571967		Brasil				Branca	Pr	Curitiba	Rua Sílvio Assumpção	159	Cidade inot detectedustrial	81305300	41998749755	maikon.barboza@outlook.com	No	No		No	Yes	Yes	No	Yes	15/09/2020	No		No	No	No	Yes	Yes	Yes	Yes	No	No	No	No	No	No	No	No	No informado	No
No	Feminino	Autônomo em casa	165	112	Joana Cardozo da Silva	Yes	07043992966		Brasil	Curitiba			Branca	Pr	Curitiba	Rua Sílvio Assumpção	159	Cidade inot detectedustrial	81305300	41995679341	profvivianebarboza@outlook.com	No	No		No	Yes	Yes	No	Yes	11/09/2020	No		No	Yes	No	Yes	Yes	Yes	Yes	No	No	No	No	No	Yes	No	No	No informado	Yes
No	Feminino	Hospital do trabalhador	1.71	94	Josefa Cirimeli Bragion de Oliveira	Yes	12061264859		Brasil	Brasil			Branca	Pr	Curitiba	Rua Suécia	260	Tarumã	82800-060	998023869	deboratoht@gmail.com	No	No		No	No	Yes	Yes	No	Sem sintoma	Yes	36	No	No	No	No	Yes	Yes	Yes	No	No	No	No	No	No	No	No	No	No
No	Masculino	Casa	178	94	Therezinha Buffara de Freitas	Yes	16090950904		Brasil		FX091133	708601543081589	Branca	Paraná	Curitiba	Rua Guararapes	2270	Vila Izabel	80320210	41988885978	sergio.consorpetro@gmail.com	No	No		No	No	No	Yes	Yes	15/09/20	Yes	37	Yes	Yes	Yes	Yes	Yes	Yes	Yes	No	No	No	Yes	Yes	Yes	No	Yes	No informado	Yes
Yes	Masculino	TRIBUNAL REGIONAL DO TRABALHO	175	90	BENEDITA ABADIA FERREIRA	Yes	62013610904		BRASIL	CURITIBA			Branca	PARANÁ	CURITIBA	AVENIDA SETE DE SETEMBRO	3815	REBOUÇA	80230000	46991015792	SAMOELPRIMO@HOTMAIL.COM	No	No		No	No	No	No	No	000000	No		No	No	No	No	No	No	Yes	No	No	No	No	No	No	No	No	No informado	No
Yes	Masculino	Hospital dermatologia do Paraná	176	96	Odete dal Pasquale colla	Yes	02282238907		Brasil	Curitiba		704106136811177	Branca	Paraná	Curitiba	Octacyr reinaldo Mion	532	Xaxim	81710050	41992061214	Mpcolla@gmail.com	No	No		No	No	No	Yes	Yes	17092020	No	36.3	No	No	No	Yes	No	Yes	No	No	No	No	Yes	No	No	No	No	Yes	No
Yes	Masculino	Autonomo	166cm	78	Verônica Rocha	Yes	64288455987		Brasil	Brasil			Branca	PR	Curitiba	Anot detectedré Prado	30	Cic	81460-239	41985015925	joelrocchaa@gmail.com	No	No		No	Yes	Yes	No	No	Sem sintomas	No		No	No	No	No	Yes	No	No	No	No	No	No	No	No	No	No	No informado	No
Yes	Feminino	UFPR	168	95	Marilda Aparecida de Medeiros	Yes			Brasil				Branca	PR	Curitiba	Rua Marechal Deodoro	441	Centro	80020320	41998979395	gabriela.abreu.passos@gmail.com	No	No		No	No	No	No	No	00/00/00	No		Yes	Yes	No	Yes	Yes	Yes	Yes	No	No	No	Yes	Yes	No	No	No	No informado	Yes
Yes	Masculino	Força aérea	181	88	Cecília Inês Stasiak Venot detectedramin	Yes	07040416930		Brasil				Branca	Paraná	Curitiba					41999157124	jorgevenot detectedramin@gmail.com	No	No		No	Yes	Yes	Yes	No	00/00/00	No		No	No	No	No	No	No	No	No	No	No	No	No	No	No	No	No	No
Yes	Feminino	Do lar	1.58	57	Leonora ribas goulart	Yes	83652124987		Brasil				Branca	Parana	Curitiba	Rua Baltazar carrasco dos reis	2753	Agua verde	80250130	41996925604	Olinot detectedabelem@hotmail.com	No	No		No	Yes	No	Yes	No	27022020	No		Yes	Yes	No	Yes	Yes	Yes	No	No	No	No	No	No	No	No	No	No informado	Yes
Yes	Feminino	Salao de beleza	1.59	58	Floriza Sutil Ferreira	Yes	68997914987		Brasil	Brasil			Parda	Parana	Curitiba	arthur manoel iwersen	550	boqueirao	81750240	41999834090	guilhermenaweb@hotmail.com	No	No		Yes	Yes	No	No	No	000000	No		No	No	No	No	No	Yes	No	No	No	No	No	No	No	No	No	No informado	No
Yes	Feminino	Prefeitua de Araucária	175	63	Amália Raffaelli	Yes	02146310952		Brasil	Brasil			Branca	Parana	Curitiba	Rua professor Ary Nogueira dos Santos	965	Boqueirao	81750280	41999143733	juliana_raffaelli@hotmail.com	No	No		No	No	No	No	Yes	17/09/2020	No		No	Yes	No	No	Yes	No	No	No	No	No	No	No	No	Yes	No	No informado	No
Yes	Masculino	Apositiveentado	1.72	80	Julieta Uzueli Villar	Yes	05136036893		Brasil	São Jose dos Pinhais			Branca	PR	Sao Jose dos Pinhais	casa	183	Pedro Moro	83020130	41998063252	pedrouvillar@gmail.com	No	No		No	Yes	Yes	No	No	12052020	No		No	No	Yes	No	No	No	No	No	No	No	No	No	No	No	No	No	No
Yes	Masculino	Comercial	1,89 cm	96	Natália Hack	Yes	05443480952		Brasil	Paraná			Branca	Paraná	Curitiba		400	Alto Boqueirão	81720300	4196033094	Peter_henrique23@hotmail.com	No	No	Idade gestacional Ignorada	No	Yes	Yes	No	No	17/09/2020	No		Yes	Yes	No	No	Yes	No	No	No	No	No	No	No	No	No	No	No informado	No
Yes	Masculino	TV Evangelizar	175cm	75	Liziane Oliveira Granemann Paulino	Yes	06415252909		Brasil				Branca	Paraná	Curitiba/PR	Rua Francisco Frischamann	2620	Portão	80320250	41992116949	vgvpaulino@gmail.com	No	No		No	No	No	No	Yes	18/09/2020	Yes	38ºC	No	No	No	No	No	Yes	No	No	No	No	No	No	No	No	No	No informado	No
Yes	Feminino	RESIDENCIA	161	54	MARIBEL PEDRO PASDIORA	Yes	09913847923		Brasil	colombo PR			Branca	PR	COLOMBO				83414320	41997001537	anapasdiorac@gmail.com	No	No		No	No	No	Yes	Yes	18/09/2020	Yes		No	Yes	No	Yes	No	No	No	No	No	No	No	No	No	No	No	No informado	No
Yes	Feminino	Desempregada	173cm	72	Maria do rocio Otto	Yes	84509201915		Brasil	Curitiba			Branca	Paraná	Curitiba	Rua Sylseu pereira alvez	236	Pilarzinho	82100-510	41997267474	elis-otto@hotmail.com	No	No		Yes	Yes	No	No	Yes	17/09/2020	No		Yes	Yes	Yes	No	No	Yes	No	No	No	No	Yes	No	No	No	Yes	No informado	Yes
Yes	Feminino	Curitiba	157	58	Nair Ternoski Del Bianco	Yes	07237712942		Brasil				Amarela	Paraná	Curitiba	Oliveira Viana, 1060 AP 609 B	1060	Hauer	81630-070	41999183068	arianedelbianco@gmail.com	No	No		No	Yes	Yes	No	Yes	13/09/2020	No		Yes	Yes	Yes	Yes	Yes	Yes	Yes	No	No	No	No	No	Yes	Yes	No	No informado	Yes
Yes	Feminino	EDS Tax	170cm	66	Cristiane Murta	Yes	08996983608		Brasil				Branca	PR	Curitiba	Rua Jovino do Rosário	1620	Boa Vista		999012814	evelynmds@hotmail.com	No	No		Yes	No	No	No	Yes	09/09/2020	No		Yes	Yes	No	Yes	Yes	Yes	Yes	No	No	No	No	Yes	Yes	No	No	No informado	No
Yes	Feminino	MAXIPAS SAUDE OCUPACIONAL	154cm	60	MARIA DAS DORES DA ROCHA DAL POZZO	Yes	00928562921		BRASIL	CURITIBA			Branca	PARANÁ	CURITIBA	REINALDO STOCCO 546 CASA 16	546	PINHEIRINHO	81820020	41999996417	leiladalpozzo@yahoo.com.br	No	No		No	Yes	Yes	No	Yes	11/09/2020	No		Yes	Yes	No	Yes	Yes	Yes	Yes	No	Yes	No	Yes	No	No	No	No	No informado	Yes
Yes	Feminino	SISTEPLAN	173	90	ANA ELISA DAMINELLI ROMAGNA	Yes	95120912915		BRASIL	CURITIBA			Branca	PR	CURITIBA	RUA CORONEL DULCIDIO	625	BATEL	80420170	996715250	lilianromagna@yahoo.com.br	No	No		No	Yes	Yes	No	Yes	17/09/20	No		No	Yes	No	No	No	Yes	No	No	No	No	Yes	No	No	Yes	No	No informado	No
Yes	Feminino	COLEGIO MILITAR DE CURITIBA	159	66	HILDA OLIVEIRA DOS SANTOS	Yes	56722362515		Brasil	Brasil			Parda	PR	CURITBA	RUA MARCO BIGARELLA	61	TARUMA	82530350	41996460087	acodsantos@gmail.com	No	No		No	Yes	Yes	No	Yes	17092020	No		Yes	No	No	No	No	Yes	No	No	No	No	No	No	No	No	No	No informado	No
Yes	Masculino	ApositiveENTADO	1.75	95	ANTONIA MARIA DE JESUS	Yes	03898202534		Brasil	Brasil			Parda	PR	CURITIBA	RUA MARCO BIGARELLA	61	TARUMA	82530350	41996460087	acodsantos@gmail.com	No	No		No	Yes	Yes	No	Yes	17092020	No		Yes	No	No	Yes	No	No	No	No	No	No	No	No	No	No	No	No informado	No
Yes	Feminino	Dona de casa	178	80	Elza joay durki	Yes	77503082968		Brasil	Curitiba			Branca	Paraná	Curitiba	Nicola pelanot detecteda	8595	Umbara	81930360	41995658850	paulabonfim014@gmail.com	No	No		No	Yes	Yes	No	No	17092020	No		No	No	No	No	No	No	No	No	No	No	No	No	No	No	No	No informado	No
Yes	Feminino	Nenhum	165cm	74	Margarete Pereira da Silva	Yes	12521559997		Brasil	Curitiba			Branca	Pr	Curitiba		280	Umbara	81940502	41996145585	Lyanot detectedra.gatinha1234@gmail.com	No	No		No	No	Yes	No	No	000000	No		Yes	No	No	No	No	Yes	No	No	No	No	No	No	No	No	No	No	No
Yes	Masculino	Casa	183	100	Eliane de Lourdes Wobeto Silveira	Yes	05290242929		Brasil				Branca	Paraná	Curitiba	Rua Ana Berta Roskamp	1236	Jardim das Américas		992398133	alexanot detectedre.wobeto@hotmail.com	No	No		No	No	No	No	Yes	13/09/20	Yes	38.5	Yes	No	No	No	No	No	No	No	Yes	No	No	No	No	No	No	No informado	Yes
Yes	Masculino	SESA-PR	172	70	Nair Araújo Brito de Macedo	Yes	09120320906		Brasil	Curitiba			Branca	Paraná	Curitiba	Rua Eduardo Geronasso	1091	Bacacheri	82510280	41992472687	daraujomcd@gmail.com	No	No		No	No	No	No	Yes	17/09/2020	No		Yes	Yes	No	No	Yes	No	Yes	No	No	No	No	No	No	No	No	No	No
Yes	Feminino	Prefeitura de Curitiba - SME	163	67	Merian Mery Laufer Rodrigues	Yes	04108662962		Brasil	Curitiba			Branca	Paraná	Curitiba	Alcides Mauro sobrado 2	65	Uberaba	81560-085	988316613	lizi.nutri@hotmail.com	No	No		No	No	Yes	No	Yes	17/09/20	No		No	No	No	No	No	Yes	No	No	No	No	Yes	Yes	No	No	No	No informado	Yes
Yes	Feminino	PMC	1.68	62	Inês Ginbarski Antocevicz	Yes	04945502951		Brasil				Branca	Paraná	Curitiba	Rua: Ministro José Linhares	544	Bairro Alto	82820370	998657567	luizasph@yahoo.com.br	No	No		No	No	No	No	Yes	14/09/2020	Yes	37	Yes	No	No	No	Yes	No	Yes	No	Yes	No	No	No	No	No	No	No informado	No
Yes	Feminino	Prefeitura Municipal de Curitiba	1.57	58	Maria Olinot detecteda Goulart de moura	Yes	00784366993		Brasil	Brasil			Branca	Parana	Curitiba	Rua almirante Gonçalves	2350	Agua verde	80250-150	41999054248	karinegativeoulartdemoura@gmail.com	No	No		No	No	No	Yes	No	000000	No		No	No	No	No	No	Yes	No	No	No	No	No	No	No	No	No	No informado	Yes
Yes	Feminino	Bacacheri	1.55	57	Terezinha de Lima Rodrigues	Yes	02664444905		Brasil	Colombo			Branca	Pr	Colombo	Do alecrim	118	Sao dimas	83411600	41996965671	Renilcerodrigues23@gmail.com	No	No		No	Yes	No	Yes	Yes	15-09-2020	No		No	Yes	Yes	Yes	No	Yes	No	No	No	No	Yes	Yes	No	No	No	No informado	Yes
Yes	Feminino	Prefeitura Municipal de Campo Largo/PR	1.60	55	Leonia Gonçalves Kavalkeviski	Yes	08648177979		Brasil	Brasil			Branca	PR	Campo Largo	Casa	116	São Marcos	83602680	41998633183	lorianekavalkeviski@gmail.com	No	No		No	Yes	Yes	Yes	No	Sem sintoma	No		Yes	No	No	No	Yes	Yes	Yes	No	No	No	No	No	No	No	No	No informado	No
Yes	Feminino	Hospital de clinicas	1.6	63	Mazilda Rosália da Rocha	Yes	76818543987		Brasil	Colombo-pr			Branca	PR	Colombo-pr	Luis gasparin	436	Alto Maracanã	83408-475	988314525	joseli.salvia@yahoo.com.br	No	No		No	Yes	No	Yes	No	00/00/00	No		No	No	No	Yes	Yes	Yes	Yes	No	No	No	No	No	No	No	No	No	No
Yes	Masculino	Paraná Turismo (Sedest)	172cm	70	Maria Dinair da Cruz Piontekievicz	Yes	06210927971		Brasil	Curitiba			Branca	Paraná	Curitiba	Rua Professor Licio de Lima	523	Novo Munot detectedo	81030-460	41987779563	tiagopiont@gmail.com	No	No		Yes	Yes	No	Yes	Yes	12/09/20	No		Yes	Yes	No	Yes	No	Yes	No	No	No	No	No	No	No	No	No	No	No
Yes	Feminino	Prefeitura Municipal de Curitiba	1,63cm	68	Gisele Maria Dalcuche Taraska	Yes	02550465962		Brasil	Curitiba	Yes		Branca	Paraná	Curitiba	Rua Arthur José Nisio	264	Uberaba	81550260	999297755	izataraska@gmail.com	No	No		Yes	No	No	Yes	No	000000	No		No	No	No	No	No	Yes	No	No	No	No	No	No	No	No	No	No informado	No
Yes	Feminino	Home Office	175	62	Leonilce Carmen Lanzarini Longhi	Yes	07037205974		Brasil	Curitiba			Branca	Paraná	Curitiba	Rua Romédio Dorigo	85	Água Verde	80620140	47996503737	leticia.longhi@hotmail.com	No	No		No	No	No	No	Yes	17/09/2020	No		No	Yes	No	No	Yes	Yes	Yes	No	No	No	No	No	Yes	No	No	No informado	Yes
Yes	Masculino	SSA Paraná Projetos	193	96	Ana Mary Calabresi Coelho	Yes	01723416983		Brasil				Branca	Paraná	Curitiba	Rua Madre Leonie	803	Tarumã		41991830854	gutocoelho@hotmail.com	No	No		No	Yes	No	No	Yes	17/09/20	No		No	Yes	No	No	Yes	No	No	No	No	No	Yes	No	No	Yes	No	No informado	No
Yes	Masculino	Autonomo	179cm	90	Elvira de Pádua	Yes	65054296972		Brasil	Curitiba			Branca	Parana	Curitiba	Travessa joao schereder	34	Sitio Cercado	81935086	41999897599	jorgeteixeira13@yahoo.com.br	No	No		No	No	No	No	Yes	18/09/2020	No		Yes	Yes	No	No	Yes	Yes	No	No	No	No	Yes	Yes	No	No	No	No informado	Yes
Yes	Masculino	Hospital	1.8	90	Yara Célia Fajardo de Anot detectedrade lima	Yes	00536941980		Brasil				Branca	PR	Curitiba	Rua coronel Alfredo Ferreira da costa	519	Jardim das Américas	81540090	41988268787	Lffajardo@uahoo.com	No	No		Yes	Yes	Yes	Yes	Yes	12/09/2020	Yes	38	Yes	Yes	Yes	Yes	Yes	Yes	Yes	No	No	No	Yes	Yes	Yes	No	No	No informado	Yes
Yes	Feminino	Unidade de saúde Martinópolis	150cm	73	Catarina Alves de Sales	Yes	06986596944		Brasil	São José dos Pinhais			Parda	PR	São José dos Pinhais	Rua Joaçaba	392	Borda do Campo	83075140	41998037835	ddesales@bol.com.br	No	No		Yes	Yes	Yes	Yes	Yes	18/09/2020	No		Yes	Yes	No	Yes	Yes	No	Yes	No	No	No	No	No	Yes	No	Yes	No informado	Yes
Yes	Feminino	Do lar	154	70	Francisca brito dos santos	Yes	56786905900		Brasil	Brasil			Branca	PR	Curitiba	Rua raul Pompéia	2320	Caiua cic	81260150	95364488	soniareginasantos.giggio@gmail.com	No	No		No	No	No	Yes	Yes	17092020	No		Yes	No	No	No	Yes	Yes	No	No	Yes	No	Yes	Yes	No	No	No	No	Yes
Yes	Feminino	Unidade de Saúde Martinopolis	1.7	65	Sueli positivesatto De Masi	Yes	93435673915		Brasil	Curitiba			Branca	Paraná	Curitiba	Vicente Machado	47	Centro	80420-010	41991542674	fernanot detectedapositivesattodemasi@gmail.com	No	No		No	Yes	No	Yes	No	Sem sintomas	No		No	No	No	No	Yes	No	No	No	No	No	No	No	No	No	No	No	No
Yes	Feminino	Em casa	1.66	71	Sirley de Lurdes Cordeiro	Yes	65021606972		Brasil	Curitiba			Branca	PR	Curitiba	Rua Francisco Mota Machado	2097	Capão da Imbuia	82810-030	41991819608	marcia2baldon@hotmail.com	No	No		No	Yes	Yes	Yes	Yes	16 09 2020	No		No	Yes	No	Yes	Yes	Yes	No	No	Yes	No	No	Yes	No	No	No	No informado	No
Yes	Feminino	Do lar	1.62	57	Jussara Heloísa Müller Zanchi	Yes	94929190959		Brasil				Branca	Parana	Curitiva	Dona Alice de Tibiriça	611	Bigorrilho	80730320	(41)99940-4447	bianca_04mz@hotmail.com	No	No		No	No	No	No	No	21/09/2020	No		No	No	No	No	No	No	No	No	No	No	No	No	No	No	No	No	No
Yes	Feminino	Unidade de saude	170	66	Rita Daniel da Silva Marineli	Yes	00726187950		Brasil	Brasil			Parda	PR	SJP				83065190	41988208007	eliane_marineli@yahoo.com.br	No	No		No	No	No	Yes	No	No	No		No	No	No	No	No	No	No	No	No	No	No	No	No	No	No	No	No
Yes	Masculino	SÃO JOSÉ DOS PINHAIS	180CM	74	MARIA APARECIDA PEREIRA DE PAULA	Yes	31335581880		BRASIL				Branca	PARANÁ	SÃO JOSÉ DOS PINHAIS	RUA JOSÉ LUCIANO	183	BRAGA	83025130	41987747171	ailtonpdepaula@gmail.com	No	No		No	No	No	No	No	000000	No		No	No	No	No	No	No	No	No	No	No	No	No	No	No	No	No informado	No
Yes	Feminino	CASA	159	84	IVETE MARTINES MUNHOZ VILLAR	Yes	04880554901		BRASIL				Branca	Paraná	SÃO JOSÉ DOS PINHAIS	RUA JOSE LUCIANO	183	PEDRO MORO	83020-130	41988047496	karenmvillar@gmail.com	No	No		No	No	Yes	No	No	00/00/00	No		No	No	No	No	No	No	No	No	No	No	No	No	No	No	No	No	No
Yes	Feminino	Secretaria	1.62	45	Silmara portes de Barros	Yes	08315016938		Brasil	Almirante Tamanot detectedaré			Branca	PR	Almirante Tamanot detectedaré	Casa	444	Areias	83514510	41998453592	Vanessaapribeiro3@gmail.com	No	No	Idade gestacional Ignorada	No	Yes	Yes	Yes	No	0000000	No	36.7	No	No	No	No	Yes	Yes	No	No	No	No	No	No	No	No	No	No informado	No
Yes	Masculino	Huem	171	56	Neusa de Almeida Lemos de Lima	Yes	09379121903		Brasil				Branca	PR	Curitiba					41995050038	Jfflima@hotmail.com	No	No		No	Yes	No	Yes	No	00/00/0000	No		No	No	No	No	No	No	No	No	No	No	No	No	No	No	No	No	No
Yes	Masculino	Casa	162	65	Sanot detectedra de Oliveira Asenjo	Yes	02321534184		Brasil				Parda	Paraná	Curitiba	Dias da rocha filho	489	Alto da XV	80045275	41991186028	Asenjonews@gmail.com	No	No		Yes	Yes	No	No	No	000000	No		Yes	Yes	No	No	Yes	No	No	No	No	No	No	No	No	No	No	No informado	No
Yes	Masculino	Desempregado	169	96	Teresinha de Fatima VirisYeso Teobaldo	Yes	05436461905		Brasil				Branca	Paraná	Curitiba	Rua das carmelitas	353	Hauer	81610070	41987865234	Itawacy@hotmail.com	No	No		No	No	No	No	No	00/00/00	No		No	No	No	No	No	No	No	No	No	No	No	No	No	No	No	No	No
Yes	Masculino	ubs martinopolis	181cm	82	Maria do socorro Almeida do Nascimento	Yes	51777851220		Brasil				Parda	Paraná	Curitiba	Rua desembargador Arthur leme	351	Bacacheri	82510-220	41988010838	gutierry@hotmail.com	No	No		No	Yes	No	Yes	Yes	19/09/2020	No		No	No	No	No	Yes	No	Yes	No	No	No	No	No	No	No	No	No	No
Yes	Feminino	Acadêmica de medicina - Hospital Evangelico	167cm	56	Ana Cristina Sampaio	Yes	06898677942		Brasil	Curitiba			Branca	Paraná	Curitiba	Francisco Rocha	1750	Bigorrilho		42999488077	elorasl@hotmail.com	No	No		No	Yes	No	Yes	Yes	05/09/20	No		No	No	No	No	Yes	No	No	No	No	No	No	No	No	No	No	No	No
Yes	Feminino	Funcionário público	176cm	104	Maria Trinot detectedade da Silva	Yes	07082917678		Brasil	Brasil			Preta	Paraná	Curitiba	Rua Júlia Huga Maria negativerello 204	2	Umbará	81930576	35991691069	marilainemsilvatc@gmail.com	No	No		No	Yes	Yes	Yes	Yes	19/09/20	No		No	No	No	Yes	Yes	Yes	No	No	No	No	No	No	No	No	No	No informado	No
Yes	Masculino	Ciapetro Distribuidora de Combustíveis	183	110	Julia Margarida Santana Volpato	Yes	03554553905		Brasil				Branca	Paraná	Curitiba					41999964868	volpato_fabiano@hotmail.com	No	No		No	Yes	Yes	No	No	00/00/00	No		No	No	No	No	No	No	No	No	No	No	No	No	No	No	No	No informado	No
Yes	Feminino	Sem trabalho	1.66	85	Analucia Camilo Silva Ferreira	Yes	12945355604		Brasil	Curitiba			Parda	Paraná	Curitiba	Rua Julia Huga Maria negativerello	204	Umbará	81930576	35988176921	ferreiragabriela123@gmail.com	No	No		No	Yes	Yes	No	Yes	19/09/2020	No		No	No	No	Yes	Yes	Yes	No	No	No	No	No	Yes	No	No	No	No informado	Yes
Yes	Masculino	Estudante (Medicina FEMPAR)	175	59	Marcia Oliveira de Oliveira Monticeli	Yes	10630610916		Brasil				Branca	Paraná	Curitiba					41987200403	fomonticeli@gmail.com	No	No		No	Yes	Yes	Yes	Yes	21/09/20	No		No	No	No	No	No	No	No	No	No	No	Yes	No	No	No	No	No	Yes
Yes	Masculino	COLÉGIO MILITAR DE CURITIBA (EXERCITO)	175cm	83	Jaci Maria Lopea	Yes	75182548915		Brasil	Brasil	No		Branca	PR	CURITIBA	Rua Florisval Lanconi	99	Tarumã	82800-120	41997208401	gilmarclopes@gmail.com	No	No		No	Yes	Yes	No	No	00/00/00	No		No	No	No	No	No	No	No	No	No	No	No	No	No	No	No	No informado	No
Yes	Feminino	Unidade de Saúde Borda do Campo	167	64	Ana Claudia dos SantosLiider	Yes	82519773987		Brasil				Branca	Paraná	Curitiba	Rua Amador Bueno	1436	Cajuru	82960020	41996569913	aninha_fisio2011@hotmail.com	No	No		No	Yes	Yes	Yes	Yes	14/09/20202	No		Yes	Yes	No	Yes	Yes	Yes	Yes	No	No	Yes	No	Yes	No	Yes	No	No informado	No
Yes	Masculino	Apositiveentado por invalidez	201cm	105	Roselaine de Arruda Holdorf	Yes	03585658989		Brasil	Curitiba	Yes		Branca	Paraná	Curitiba	Rua Nunes Machado	596	Rebouças	80250000	41997823666	sdholdorf@gmail.com	No	No		Yes	Yes	Yes	No	No	No	No		Yes	No	No	Yes	No	Yes	Yes	No	Yes	No	Yes	No	No	No	No	No	No
Yes	Feminino	No trabalho	1.54	63	Ivone Kuzminski Kaminski	Yes	07553918962		Curitiba	Paraná	No tenho		Branca	Paraná	Curitiba				81150080	41999761178	jessicakk32@hotmail.com	No	No		No	No	No	No	Yes	13/09/20	No		No	Yes	Yes	No	Yes	No	Yes	No	No	No	No	No	No	No	No	No	No
Yes	Masculino	Curitiba	168	63	Maria Olinot detecteda Goulart de Moura	Yes	03132718955		Brasil				Branca	PR	Curitiba	Rua Renato Polatti	3539	Campo Comprido	81230170	41991140763	michel.mgaudio@gmail.com	No	No		No	No	No	No	No	000000	No		No	No	No	No	No	No	No	No	No	No	No	No	No	No	No	No informado	No
Yes	Feminino	HC UFPR	172	57	Maria Divina Saraiva Jabbur	Yes	06625354996		Brasil				Branca	Paraná	Curitiba	Rua Lothario Boutin Bloco 18 Apto 604	220	Pinheirinho	81110522	41999658524	isis_sara@hotmail.com	No	No		No	No	No	Yes	No	000000	No		Yes	No	No	No	No	No	No	No	No	No	No	No	No	No	No	No	No
Yes	Feminino	Home ofice	159 cm	76	Linot detectedaura VirisYeso Bastos	Yes	35765887953		Brasil				Branca	Pr	Curitiba	Rua das Carmelitas	353	Hauer	81610070	41991882017	fatti2007@hotmail.com	No	No		No	No	No	Yes	No	0000000	No		Yes	No	No	No	Yes	No	No	No	No	No	No	No	No	No	No	No informado	No
Yes	Feminino	Estudante de medicina - Fempar	160cm	61	Dulcejane Oliveira Silva	Yes	09363954943		Brasil				Parda	PR	Curitiba	Rua Padre Giacomo Cusmano	177	Campina do Siqueira	80730230	43996139847	ingrid_hoegen@hotmail.com	No	No		No	Yes	Yes	Yes	No	00/00/00	No		No	No	No	No	No	No	No	No	No	No	No	No	No	No	No	No	No
Yes	Feminino	Estudante de medicina	176	94	Luzia Aparecida Ozório Ferraz	Yes	42715772866		Brasil	Curitiba			Branca	PR	Curitiba	Rua padre anchieta	2540	Bigorrilho	80730000	18996798444	Melissaferraz_8@hotmail.com	No	No		No	No	No	Yes	Yes	17/09/2020	No		No	No	No	No	Yes	No	Yes	No	No	No	No	No	Yes	No	No	No	No
Yes	Feminino	Tasche	162	64	NEUZA Maria De Almeida	Yes	05794131950		Brasil	Brasil			Branca	PR	Curitiba	Rua Pastor Antonio Polito	1559	Boqueirao	81770260	41997696507	annecarolina23@hotmail.com	No	No		No	No	No	Yes	Yes	18092020	No		Yes	Yes	No	No	Yes	Yes	No	No	No	No	No	No	No	No	No	No informado	No
Yes	Feminino	Funpar	1.70	72	Inês Ana Parizotto dos Santos	Yes	95595910968		Brasil	Brasil			Branca	Paraná	Curitiba	Rua Florisval Lanconi	99	Tarumã	82800-120	41991512884	aliceialopes@hotmail.com	No	No		No	No	No	Yes	No	00/00/00	No		Yes	No	No	No	No	No	No	No	No	No	Yes	No	No	Yes	No	No informado	No
Yes	Masculino	Secretaria Municipal de Saúde de Pinhais	171	126	Carmen Grohmert	Yes	03692320973		Brasil	Curitiba		700504975631253	Parda	PR	Curitiba	Canot detectedido Hartmann	4161	Santo Inácio	82010-000	41988385114	claudiomacedoctba@gmail.com	No	No		No	Yes	Yes	Yes	No	00/00/00	No		No	No	No	No	No	No	No	No	No	No	No	No	No	No	No	No	No
Yes	Feminino	Restaurante cabana do sabor	165cm	70	Durvalina das Chagas castelhano	Yes	49538934920		Brasil	Brasil			Branca	PR	Curitiba		62	São João	82030135	988877974	elisamariacastelhano@gmail.com	No	No		No	Yes	No	No	Yes	19/09/2020	Yes	38	Yes	No	Yes	Yes	Yes	Yes	No	No	Yes	Yes	No	Yes	Yes	No	Yes	No informado	Yes
Yes	Feminino	Apositiveentada	170cm	79	Palmira Gonsalves Pereira	Yes	06500520807		Brasil	Brasil			Branca	PR	Curitiba	Rua professora Maria Balbino Costa dias	263	Boa Vista	82560305	984133019	sjjaurelio@hotmail.com	No	No		No	Yes	Yes	No	Yes	15092020	No	Sem febre	Yes	No	No	Yes	No	Yes	Yes	No	Yes	No	No	No	No	No	No	No informado	Yes
Yes	Feminino	Corpo de Bombeiros	160cm	58	Gesilaine Katia Gouveia Isipon	Yes	04380432947		Brasil	Brasil			Branca	Parana	Curitiba	Rua Parintins	972	Vila Izabel	80320270	41988358355	mariana.isipon@gmail.com	No	No		Yes	Yes	No	Yes	No	19/09/20	No		No	Yes	No	Yes	No	Yes	Yes	No	No	No	No	No	Yes	No	No	No informado	Yes
Yes	Masculino	Ciapetro Distribuidora de Comb Ltda	180	83	Rosana Ribeiro da Cruz	Yes	08067381976		Brasil	Curitiba			Branca	PARANÁ	CURITIBA	RUA EDUARDO CARLOS PEREIRA	32234	PORTÃO	80610170	41988188501	paulo2005_2@hotmai.com	No	No		Yes	Yes	Yes	No	Yes	18/09/2020	No		Yes	No	Yes	Yes	Yes	Yes	Yes	No	No	No	Yes	No	Yes	No	Yes	No informado	Yes
Yes	Masculino	Ciapetro	175cm	69	Fabiane de cassia Santos	Yes	09871570945		Brasil		No		Parda	PR	Contenot detecteda	Casa	2227	Centro	83730000	41995948414	Gustavomattheus@hotmail.com	No	No		No	Yes	No	No	No	00/00/00	No		No	No	No	No	No	No	No	No	No	No	No	No	No	No	No	No	No
Yes	Masculino	UBS São Marcos	188	93	Vera Lucia Lima Campestrini	Yes	38526324802		Brasil	São José dos Pinhais			Parda	PR	São José dos Pinhais					32988692700	vlcampestrini@gmail.com	No	No		No	Yes	Yes	Yes	Yes	19/09/20	No		No	Yes	No	No	Yes	Yes	Yes	No	No	No	No	No	No	No	No	No	No
Yes	Masculino	Getest ensaios No destrutivos	173cm	80	Maria Viana de Freitas	Yes	36006351668		brasil	curitiba			Branca	paraná	curitiba	rua Rogério Pereira de Camargo	134	campo comprido	81280390	41988573369	getest@uol.com.br	No	No		No	No	No	No	No	00/00/00	No		No	No	No	No	No	No	No	No	No	No	No	No	No	No	No	No informado	No
Yes	Masculino	Estudante	180	82	Analucia Silva Camilo Ferreira	Yes	10370884680		Brasil				Parda	Paraná	Curitiba	Rua Júlia Huga Maria negativerello	204	Umbará	81930576	35992006563	caioferreiratc@gmail.com	No	No		No	Yes	Yes	No	No	00/00/00	No		No	No	No	No	No	Yes	No	No	No	No	No	No	No	No	No	No informado	No
Yes	Masculino	Upa cic	188cm	76	Luciana Wenot detectedler Muller Santana	Yes	08550481904		Brasil	Curitiba			Branca	PR	Curitiba				N/A	41999603626	gmullersantana@gmail.com	No	No		No	No	No	Yes	Yes	20/09/2020	No		No	Yes	No	No	Yes	Yes	Yes	No	Yes	Yes	No	No	No	No	No	No	No
Yes	Masculino	Serede	167	57	Silva de Jesus Filgueira	Yes	05331504930		Brasil	Brasil			Parda	pr	Curitiba	Rua djama ferreira Maciel	893	Linot detectedóia	81010-270	41999878500	gilliardbat@hotmail.com	No	No		No	No	No	No	Yes	12092020	Yes	37.9	Yes	No	No	Yes	Yes	Yes	Yes	No	No	No	Yes	Yes	Yes	No	No	No informado	Yes
Yes	Masculino	SESA	175cm	113	Maria da Luz Kapchuki	Yes	01629017981		Brasil	Araucaria			Branca	Parana	Araucaria	Rua dasTulipas	239	Campina da Barra	83709380	41996793435	ivoneik@hotmail.com	No	No		No	Yes	Yes	Yes	Yes	19092020	Yes	37.5	Yes	Yes	No	Yes	Yes	Yes	Yes	No	Yes	Yes	No	No	No	Yes	No	Yes	No
Yes	Feminino	SESA nível central	164cm	70	Lúcia Elena Pietrangelo Merlino	Yes	00943984963		Brasil				Branca	PR	Curitiba	Rua Álvaro Anot detectedrade	445	Portão	80610240	44998347082	nanot detecteda_merlino@hotmail.com	No	No		No	Yes	No	No	No	000000	No		No	No	No	No	No	No	No	No	No	No	No	No	No	No	No	No informado	No
Yes	Masculino	Assados combate	175	88	Zelma de Campositive Lúcio de Oliveira	Yes	38552711869		Brasil				Branca	Paraná	Curitiba	Rua Álvaro Anot detectedrade	445	Portão	80610240	15996914554	alvarolcl@gmail.com	No	No		No	Yes	No	No	No	000000	No		No	No	No	No	No	No	No	No	No	No	No	No	No	No	No	No informado	No
Yes	Feminino	Pinhais Previdência	1.62	47	Maria Aparecida Ferreira	Yes	11423236920		Brasil	Pinhais			Branca	Paraná	Pinhais					41998987456	leticiaburda@gmail.com	No	No		No	Yes	Yes	No	No	00/00/00	No		No	No	No	No	Yes	Yes	No	No	No	No	No	No	No	No	No	No informado	No
Yes	Masculino	Clinica privada	175	83	ANGELINA BERTOL	Yes	47088559900		Brasil	Curitiba	Fp046860		Branca	Paraná	Curitiba	Des Arthur Leme	351	Bacacheri	82510220	41996448719	bertol10@hotmail.com	No	No		Yes	No	Yes	No	No	000000	No		No	No	No	No	Yes	No	No	No	No	No	No	No	No	No	No	No informado	No
Yes	Feminino	Sicoob	169	69	Maiza Fernanot detectedes Leonardo	Yes	06535953955		Brasil	Brasil		801434115241662	Branca	PR	Curitiba	Rua Presidente Rodrigo Otávio	1621	Hugo Lange	80040452	41999966779	fbruna366@gmail.com	No	No		No	Yes	Yes	No	Yes	18/09/2020	No		No	No	No	No	Yes	Yes	No	No	No	No	No	Yes	No	No	No	No informado	No
Yes	Feminino	Eventos	1.78	80	Regiane lima pinto	Yes	10982879911		Brasil				Branca	Paraná	Curitiba					41997691413	Emanuellybonassoli.prof@gmail.com	No	No		No	Yes	No	Yes	Yes	08/09/2020	Yes	38.6	Yes	Yes	Yes	Yes	Yes	Yes	Yes	No	No	No	Yes	Yes	Yes	No	Yes	No informado	Yes
Yes	Feminino	Em casa	176	100	Rosemeire Lima Pinto	Yes	06810036938		Brasil				Branca	PR	Colombo	Genésio Moreschi	1552	Guaraituba	83410000	41996401518	duda16ls@gmail.com	No	No		No	Yes	Yes	Yes	Yes	10/09/20	Yes	38	Yes	Yes	Yes	Yes	Yes	Yes	Yes	No	No	No	Yes	Yes	Yes	No	Yes	No informado	Yes
Yes	Masculino	AV GETULIO VARGAS 3848	175	95	ELIZABETH DITZEL SLOMPO	Yes	04605761942		Brasil	CURITIBA			Branca	PR	CURITIBA	FRANCISCO DEROSSO	6530	ALTO BOQUEIRÃO	81770263	41992185577	MARCIO_SLOMPO@YAHOO.COM.BR	No	No		No	No	No	Yes	Yes	17/09/2020	Yes	38.5	No	No	No	No	No	Yes	No	No	No	No	No	No	Yes	No	No	No informado	No
Yes	Feminino	Maternidade Nossa Senhora de Fátima	163	76	Joelma Baby Couto	Yes	05631560909		Brasil				Branca	PR	Curitiba					41999171947	leticiababycouto@gmail.com	No	No		Yes	Yes	Yes	Yes	No	00/00/00	No		No	No	No	No	No	Yes	No	No	No	No	No	No	No	No	No	No informado	No
Yes	Feminino	Salão de Beleza	1.51	53	Floriza Sutil Ferreira	Yes	47847077949		Brasil				Parda	Parana	Curitiba	Arthur Manoel Iwersen	550	boqueirao	81750240	41999163048	leonidasdegoes@gmail.com	No	No		Yes	Yes	No	No	No	000000	No		No	No	No	Yes	No	Yes	No	No	No	No	Yes	No	No	No	No	No informado	No
Yes	Masculino	Home office	176 cm	100	Nilvia fiates furiatti	Yes	28707877900		Brasil	Curitiba			Branca	Parana	Curitiba	Alameda Júlia da costa	2448	Bigorrilho	80730070	988365353	ffuriatti@hotmail.com	No	No		No	No	No	No	Yes	14/09/2020	Yes	38	Yes	No	No	No	No	No	Yes	No	No	No	No	No	No	No	No	No	No
Yes	Feminino	Hospital de Clínicas UFPR	176cm	68	Neusa Peron Xavier	Yes	58926488934		Brasil				Branca	Paraná	Curitiba	Rua João Mequetti	759	Santa Cânot detectedida	82640360	41999682132	Yesonne_enf@hotmail.com	No	No		No	No	No	Yes	No	00/00/00	No		No	No	No	No	No	Yes	Yes	No	No	No	No	No	No	No	No	No	No
Yes	Masculino	Prefeitura de Campo Largo	181	80	Roseli Beckert Trevisan	Yes	05777286950		Brasil				Branca	Pr	Campo Largo	Antonio Jordao Guiraud	81	Vila Bancária		41984223737	rbtrevisan@gmail.com	No	No		No	Yes	Yes	Yes	No	000000	No		No	No	No	No	Yes	No	Yes	No	No	No	No	No	No	No	No	No informado	No
Yes	Feminino	Ricamo bordados	154cm	58	Ioneko Imai Niimoto	Yes	63389991972		Brasil	Curitiba			Amarela	Paraná	Curitiba	Rua professor Nivaldo Braga	434	Cajuru	82900090	41985025524	alziramitiyo1966@gmail.com	No	No		No	Yes	No	Yes	No	O00000	No	Sem febre	No	No	No	No	No	No	No	No	No	No	No	No	No	No	No	No informado	No
Yes	Masculino	Autônomo	165cm	98	Cleonice Mota Machado Marinho	Yes	02914984936		Brasil	Brasil			Branca	Paraná	Curitiba	Rua Deputado Cunha Bueno Bloco A Apt 102	489	Cidade Inot detectedustrial	81450-320	41992028967	lucas.trabalhador@yahoo.com.br	No	No		No	No	No	No	No	00/00/00	No		No	No	No	No	No	No	No	No	No	No	No	No	No	No	No	No	No
Yes	Masculino	Residencial Bologna	1.75	100	Isabel Silvano Pinheiro	Yes	34039821904		brasil	Brasil			Parda	parana	curitiba	arthr manoel iwersen	550	boqueirao	81750240	41988241839	guilhermenaweb@hotmail.com	No	No		Yes	Yes	Yes	No	No	000000	No		Yes	No	No	No	No	No	No	No	No	No	Yes	No	No	No	No	No informado	No
Yes	Feminino	Irmãos Muffato	175	59	Tereza Borox Knauth	Yes	03410318950		Brasil	Curitiba	Nao		Branca	Pr	Curitiba	Renato polatti	3651	Campo comprido	81230170	041998992060	angelaknauth@yahoo.com.br	No	No		No	No	No	Yes	No	20092020	No		No	No	No	Yes	Yes	Yes	No	No	No	No	No	No	No	No	No	No informado	No
Yes	Feminino	Almeida advogados	160	65	Rachel valeriana das chagas marques	Yes	02848883979		Brasil	Curitiba			Parda	PR	Curitiba	Carlos Essenfelder	2710	Boqueirão	81730060	41996096765	jaqueabrra34@hotmail.com	No	No		No	No	No	No	Yes	21/09/2020	No		No	No	No	Yes	Yes	Yes	No	No	No	Yes	No	Yes	Yes	Yes	No	No informado	No
Yes	Feminino	SEDU	169	66	Márcia Regina Colombes Alves	Yes	04481212985		Brasil				Branca	PR	Curitiba					41992013333	robertaguimaraes8@gnail.com	No	No		No	No	No	No	Yes	19/09/2020	No		No	Yes	No	No	No	No	Yes	No	No	No	Yes	No	Yes	Yes	No	No informado	Yes
Yes		R. Salgado Filho, 570 - Pineville, Pinhais	169	80	Anot detectedréia Cristina Gomes de Freitas	Yes	09715209920		Brasil				Parda	PR	Curitiba	Rua Sertaneja	71	Sitio Cercado	81900410	995038712	augusto_g_freitas@hotmail.com	No	No		No	No	No	No	Yes	19/09/2020	No		Yes	Yes	No	No	Yes	Yes	Yes	No	No	No	No	No	Yes	No	No	No informado	No
Yes	Feminino	Casa	163	54	Jucélia Venot detectedramin	Yes	05479769928		Brasil	Curitiba			Branca	Paraná	Curitiba	Rua Guilherme Pugsley	2604	Água Verde	80610300	41998095887	annaluisa.vf@gmail.com	No	No		No	No	No	No	No	00/00/00	No		No	No	No	No	Yes	Yes	No	No	No	No	No	No	No	No	No	No informado	No
Yes	Masculino	DJ autônomo	176	71	Wilzeli Rejane do Amaral	Yes	05150126969		Brasil	Curitiba			Preta	PR	Curitiba	Rua Santa Zita	281	Guaíra	80630260	41998975508	wellton00@gmail.com	No	No		No	Yes	No	No	No	00/00/00	No		Yes	No	No	No	Yes	Yes	Yes	No	No	No	No	No	No	No	No	No informado	No
No	Feminino	Pinhais Previdência	155	66	Iranete Rodrigues Fonseca	Yes	00862956242		Brasil				Parda	Paraná	Pinhais	Rua Graúna	242	Jardim Claudia	83326390	41992530635	alaidefonseca27@gmail.com	No	No		No	Yes	Yes	No	No	00/00/00	No		No	No	No	No	No	No	No	No	No	No	No	No	No	No	No	No informado	No
Yes	Feminino	Hotel Victoria Villa	161	61	Rosani Pretko de Queiroz	Yes	08508608900		Brasil				Branca	Paraná	Curitiba	Avenida República Argentina	5535	Novo Munot detectedo	81050001	41988651508	rafaqroz@gmail.com	No	No		No	Yes	No	No	Yes	18/09/20	Yes	35.8	No	No	No	No	Yes	No	Yes	No	No	No	Yes	No	No	No	No	No informado	No
Yes	Masculino	Pinhais Previdência - Município de Pinhais	183cm	79	Nívea Maria Klas Marins de Ocampositive	Yes	05266286938		Brasil				Branca	PR	Curitiba				41992025198	992025198	guillermo.ocampositive@pinhais.pr.gov.br	No	No		No	Yes	Yes	No	No	00/00/00	No		No	No	No	No	No	No	No	No	No	No	No	No	No	No	No	No informado	No
Yes	Feminino	Eventos	165	63	Natalina Smaniotto	Yes	04591409902		Brasil				Branca	Paraná	Curitiba	Rua Manoel de chagas lima	460	São Brás	82309350	41991690882	laisnajla@hotmail.com	No	No		No	Yes	Yes	No	Yes	15/08/2029	No		No	No	No	No	Yes	Yes	No	No	No	No	No	No	No	No	No	No informado	Yes
Yes	Masculino	CPAP Vital	170	80	Hilda Cordeiro de Paula	Yes	04138707905		Brasil	Curitiba - PR	Yes		Parda	Paraná	Curitiba	Av Vicente Machadi	2714	Campina do Siqueira	80440-020	41996963970	felipe_depaula@outlook.com	No	No		No	Yes	Yes	No	Yes	19/09/2020	Yes		Yes	Yes	No	Yes	Yes	Yes	Yes	No	Yes	Yes	Yes	Yes	No	No	No	No informado	Yes
Yes	Masculino	Cabeleireiro	1.8	90	Maria Dalva Ferreira Carneiro	Yes	15115029839		Brasil	Curitiba			Branca	PR	Curitiba	Rua coronel Alfredo Ferreira da Costa	519	Jardim das Américas	81540090	41987389858	marcoscardosogyn@hotmail.com	No	No		No	Yes	No	Yes	Yes	03/09/2020	No		Yes	Yes	Yes	Yes	No	Yes	Yes	No	No	No	Yes	Yes	Yes	Yes	Yes	No informado	Yes
Yes	Masculino	CMC	190	90	Janete Militão de Carvalho	Yes	75163551949		Brasil				Branca	Paraná	Curitiba	Rua Suécia	260	Tarumã	82800060	41999833985	marinomechd@gmail.com	No	No		No	Yes	No	Yes	No	18/09/2020	No		No	No	No	No	No	No	No	No	No	No	Yes	No	No	No	No	No	No
Yes	Feminino	Funcionário público	1.65	90	Antonia Ramos de arruda	Yes	05354508851		Brasíl				Parda	PR	Curitiba	Rua dr Carlos Bruno breithaupt,	72	Jardim das Américas	81540150	41988202244	Esme_arruda@yahoo.com.br	No	No		No	Yes	No	Yes	Yes	10 dias	No		Yes	Yes	Yes	Yes	Yes	Yes	No	No	No	No	Yes	Yes	Yes	No	No	No informado	Yes
Yes	Masculino	Altonomo	179cm	80	Maria Sônia Gimenes Furlan	Yes	02930347961		Brasil	Curitiba			Branca	Paraná	Curitiba	Rua Luiz Burda.	316	Tatuqura	81480050	41998954695	eugeniofurlan@hotmail.com	No	No		No	Yes	No	No	Yes	15/09/20	No		Yes	No	No	Yes	Yes	Yes	No	No	No	No	No	Yes	Yes	No	No	No informado	Yes
Yes	Masculino	Btcc conexão cliente	191 cm	80	Thalysia	Yes	09489217905		Brazil	Brasil			Branca	Pr	Curitiba	Rua	135	Atuba	82630-306	41998385832	joaotatara.eng@gmail.com	No	No		No	No	No	No	Yes	16/09/2020	No		Yes	Yes	No	No	Yes	Yes	Yes	Yes	No	No	No	No	No	Yes	No	No informado	No
No	Feminino	Complexo Médico Penal	168	75	Sirlete Teresinha Demari Flora	Yes	04496135930		Brasil				Branca	Paraná	Pinhais	Rua Santa fé	502			41999195599	sheila.flora@depen.pr.gov.br	No	No		No	Yes	Yes	No	Yes	18/09/20	No		No	Yes	No	Yes	No	Yes	No	No	No	No	No	Yes	No	No	No	No informado	No
	Masculino	Policia Militar	178	96	Adriane Maria Koehler	Yes	7952172930		Brasil	Curitiba			Branca	PR	Curitiba	rua Dr Danilo Gomes	2091	Boqueirão	81750070	41998750805	jonathan.michalski@icloud.com	No	No		No	Yes	No	No	Yes	2020-09-05	No		Yes	Yes	No	Yes	Yes	No	No	No	No	No	No	No	No	No	No	No informado	No
	Masculino	aa	333	333	NILZA BARBOSA DA SILVA DE OLIVEIRA	Yes	988616971		brasil				Ignorado	pr	almirante tamanot detectedare					41996697850	a@	No	No		No	No	No	No	No	2020-09-04	No		Yes	No	Yes	Yes	Yes	Yes	Yes	Yes	Yes	Yes	Yes	Yes	Yes	Yes	No	No	No
	Masculino	Policial Militar	167	74	Miriam Cristina Gomes Daniel	Yes	4685218957		Brasil				Branca	Paraná	Curitiba					41984494616	pscol85@hotmail.com	No	No		No	Yes	Yes	Yes	Yes	2020-09-08	Yes		No	No	No	Yes	Yes	Yes	Yes	No	Yes	Yes	Yes	No	No	No	No	No informado	Yes
	Masculino	17°BPM	1.85	105	Cleuza Maria Jacques Maciel	Yes	676558070		Brasil	São Jose dos Pinhais			Branca	PR	São Jose dos Pinhais	Antônio Moro	1047	Costeira	83.015-290	41992690353	laurencejacques@bol.com.br	No	No		Yes	Yes	Yes	Yes	Yes	2020-09-01	No		Yes	No	No	Yes	Yes	Yes	No	No	Yes	Yes	Yes	Yes	Yes	No	No	No informado	Yes
	Masculino	Policia militar	175cm	80	Marli	Yes	4611565980		Brasil	Curitiba			Branca	Pr	Curitiba	Rua xingu 991		Bairro alto	82840300	41996667921	britopmpr03@yahoo.com.br	No	No	Idade gestacional Ignorada	Yes	No	No	Yes	Yes	2020-09-04	Yes	39	Yes	No	No	Yes	Yes	No	No	No	Yes	Yes	No	No	No	No	No	No informado	No
	Masculino	Polícia Científica	178	76	Joanina Lyjak Grochocki	Yes	68921225163		Brasil	Curitiba			Ignorado	Parana	Curitiba					41999335439	luiz.grochocki@policiacientifica.pr.gov.br	No	No		No	Yes	Yes	No	Yes	0	No		Yes	Yes	No	Yes	No	No	Yes	No	No	No	No	No	Yes	No	No	No informado	No
	Feminino	restaurante	168	72	Elizabeth Maria Todeschini Speranot detectedio	Yes	7301055986		Brasil	Curitiba	FU343397		Branca	Paraná	Curitiba	avenida do batel, 1597	701	batel	80420090	41999260050	marcella_speranot detectedio@hotmail.com	No	No		No	No	No	No	No	00/00/00	No		No	No	No	No	Yes	No	No	No	No	No	Yes	No	No	No	No	No	No
	Feminino	IFPR	176	76	Dalia Valevein Rodrigues	Yes	91731496168		Brasil	Brasil			Branca	Paraná	Curitiba	Rua Yesão Lissa	299	Santo Inácio	82010-280	41997850635	elisangela.rodrigues@ifpr.edu.br	No	No		No	No	No	Yes	Yes	2020-09-07	No		No	Yes	No	No	Yes	No	Yes	No	No	No	No	No	No	No	No	No informado	No
	Feminino	Nexcore Tecnologia	172	60	Maria de Fátima Pranke	Yes	545722071		Brasil	Brazil			Branca	PR	Curitiba					41991416551	sara.pranke@gmail.com	No	No		No	Yes	No	No	No	2020-09-04	No		No	No	Yes	No	Yes	No	Yes	No	No	No	No	No	No	No	Yes	No informado	Yes
	Feminino	Casa de custódia de são José dos Pinhais	158cm	80	Terezinha Maria de Oliveira	Yes	4421277908		Brasil				Branca	Paraná	Curitiba	São Clemente hofbauer	139	Cidade inot detectedustrial	81450220	41999846786	silvanaosouza06@gmail.com	No	No		No	Yes	Yes	No	Yes	2020-09-08	No		No	No	No	No	Yes	Yes	Yes	No	Yes	Yes	Yes	No	No	No	No	No informado	No
	Masculino	0	0	0	OLGA DZIENISZKZK	Yes	1221199838		BRASIL	CURITIBA			Branca	PARANÁ	CURITIBA	MAJOR VICENTE DE CASTRO	1297	FANNY		991257549	0	No	No		No	Yes	Yes	No	Yes	8092020	No		No	No	No	No	Yes	No	No	No	No	No	No	No	No	No	No	No informado	No
	Masculino	Hospital Angelina Caron	175	80	Sirlei Aparecida de Jesus	Yes	6773447917		Brasil	Campina granot detectede do Sul			Parda	Pr	Campina granot detectede do Sul	Rua Benedito Pires Cordeiro	99	Jd Diamante	83430000	41984587827	rafaelhjr@hotmail.com	No	No		No	Yes	Yes	Yes	No	2020-09-08	Yes		No	No	No	Yes	No	Yes	No	No	No	No	No	No	No	No	No	No	Yes
	Feminino	Desempregada	1,55 cm	52	Marlene scheletz de barros Loyola	Yes	11197213937		Brasil				Branca	Paraná	Curitiba	Pacífico Guimarães Teixeira filho	258	Uberaba	81570130	41995997277	Amanot detecteda_loyola@outlook.com	No	No		No	No	No	Yes	Yes	2020-09-10	No		No	Yes	No	No	Yes	Yes	Yes	No	Yes	Yes	No	No	No	No	No	No informado	No
	Masculino	Policia Militar do Paraná	171cm	83	Sueli Alves Tavares	Yes	2827180952		Brasil	Curitiba	No tenho		Branca	Parana	Curitiba					41984028134	elielmgts@hotmail.com	No	No		No	No	No	No	Yes	2020-09-08	No		Yes	No	Yes	Yes	No	Yes	No	No	Yes	Yes	No	No	Yes	No	No	No informado	No
	Feminino	Hospital da Polícia Militar	164cm	79600	Maria Iara de Jesus	Yes	2289534994		Brasil	Brasil			Parda	Paraná	Curitiba	Rua cascavel	2365	Boqueirão	81750090	998943444	elisetedenise@yahoo.com.br	No	No		No	Yes	Yes	Yes	Yes	2020-09-09	No		Yes	No	No	Yes	Yes	Yes	No	No	Yes	Yes	No	No	No	No	No	No	No
	Masculino	Pmpr	175cm	85	Rosalina	Yes	8936546988		Brasil	Ponta Grossa			Branca	Paraná/Ponta Grossa/Brasil	Ponta Grossa				84020020	9916299679	igorkrepelbatistao@hotmail.com	No	No		No	Yes	Yes	Yes	Yes	2020-08-15	Yes		Yes	Yes	No	Yes	Yes	Yes	Yes	No	No	No	No	Yes	No	No	No	No informado	Yes
	Feminino	conplexo medico penal	1.63	63	lenise maria alves	Yes	0		Brasil	Curitiba	Yes	0	Branca	sao paulo	Curitba	RUA francisco senicot sobrinho	270	santa canot detectedida	82640220	413524406	LIA MARA ALVES@yayoo.com	No	No	Idade gestacional Ignorada	Yes	Yes	Yes	No	No	14 09 2020	No	36	No	No	No	No	Yes	Yes	No	No	Yes	Yes	No	No	No	No	No	No	Yes
	Masculino	aa	333	333	MEIRE MARSSIS FAIS BENVENUTI	Yes	3090085909		brasil				Ignorado	pr	curitiba					41996938291	aa@	No	No		No	No	No	No	No	2020-09-05	No		No	No	No	No	No	No	No	No	No	No	No	No	No	No	No	No	No
	Masculino	Pinhais	183	108	Anita Cristina lemos de Souza	Yes	1878609980		Brasil	Pinhais			Parda	Pr	Pinhais	R porecatu	582	Emiliano Perneta	83325150	984096273	Lemos77.11@hotmail.com	No	No		No	Yes	Yes	No	Yes	2020-09-08	No		No	No	Yes	Yes	No	No	Yes	No	Yes	Yes	No	Yes	Yes	Yes	Yes	No informado	Yes
	Masculino	Policia militar	183	90	Deortanilia Fátima soares dos santos	Yes	2787201962		Brasil	Brasil			Branca	PR	Colombo	Rua Rio japura	203	Roça granot detectede	83403350	41999151859	eliosteinhaus@hotmail.com	No	No		No	No	No	No	Yes	2020-08-01	No		Yes	Yes	No	No	No	No	No	No	No	No	No	No	No	No	No	No informado	No
	Feminino	Home office	151	51	Jucelia kirtschig Teixeira	Yes	5868795954		Brasil	São José dos Pinhais			Branca	Paraná	São José dos Pinhais	Rua Tavares de Lyra	957	Afonso Pena	83050000	41988346421	bhiacwb@gmail.com	No	No		No	Yes	Yes	No	Yes	2020-09-07	No		No	No	No	No	No	No	No	No	Yes	Yes	No	No	No	No	No	No	No
	Masculino	Polícia Militar	169	80	Idair da Luz	Yes	8151002999		Brasil				Parda	Paraná	São José dos Pinhais	rua Tavares de Lyra	957	parque da Fonte		41996998565	alekspmpr@gmail.com	No	No		No	Yes	Yes	Yes	Yes	2020-09-07	No		Yes	Yes	Yes	Yes	No	Yes	Yes	No	Yes	Yes	No	No	Yes	No	No	No informado	Yes
	Masculino	aa	333	333	CLEUSA RODRIGUES DE LIMA GARCIA	Yes	6431509943		brasil				Ignorado	pr	curitiba					41999898446	aa@	No	No		No	No	No	No	No	2020-09-06	Yes		No	Yes	No	No	No	No	No	No	Yes	Yes	No	No	No	No	No	No	No
	Feminino	policia militar	157	45	NEIVA TEREZINHA DE DEUS	Yes	8448436954		brasil				Ignorado	pr	curitiba	henrique martins torres	1422	boqueirao	81750080	998134511	priscilaluana18@gmail.com	No	No		No	No	Yes	No	No	2020-09-05	No		No	Yes	Yes	No	No	No	No	No	No	No	Yes	No	No	No	No	No	No
	Masculino	Policia Militar do Parana	182cm	94	Telma Aparecida Soares	Yes	3626041930		Brasil				Branca	Pr	Curitiba	Cada	88	Fazenot detectedinha		41998924619	sidsuarrez@gmail.com	No	No		No	No	No	No	Yes	2020-09-09	Yes	37.4	No	No	No	No	No	No	No	No	No	No	No	No	No	No	No	No informado	No
	Feminino	terceirizada da Oi	159cm	75	Hayde Rodrigues Dos Santos	Yes	11640713948		PR	Curitiba	nao		Branca	PR	CURITIBA	RUA ODALEIA COSTA AGUAS	155	CAJURU	82990193	41984606129	domingossarah413@gmail.com	No	No		Yes	Yes	Yes	Yes	No	00/00/00	Yes	37 a 38,5	Yes	Yes	Yes	Yes	No	Yes	Yes	Yes	Yes	Yes	Yes	No	Yes	No	Yes	No informado	No
	Masculino	Polícia Militar	181	94	Nilcelia do Rocio Barboza	Yes	2723910938		Brasil	Curitiba			Branca	Pr	Curitiba	Manot detectedirituba	1520	Sitio cercado	81925-540	41998045485	painetodeogum@gmail.com	No	No		No	No	No	No	Yes	2020-09-07	Yes	37.5	Yes	No	No	Yes	No	Yes	No	No	No	Yes	Yes	No	Yes	Yes	No	No informado	Yes
	Masculino	secretaria de seguranca publica do parana	1.95	82	celia regina felippe	Yes	6629685903		Brasil	colombo	nao	708505310823978	Branca	parana	colombo	Rua francisto tanner	461	sao dimas	83411160	4199901550	denisSCHWAB@hotmail.com	No	No	Idade gestacional Ignorada	No	No	No	Yes	Yes	05 09 2020	No	36.8	Yes	Yes	Yes	No	Yes	No	Yes	No	No	No	No	No	No	No	Yes	No	No
	Masculino	13 Batalhão de Polícia Militar	173	66	Ester da Silva Chaves da Cruz	Yes	674735986		Brasil				Branca	Paraná	Curitiba					41988021593	13.augusto@gmail.com	No	No		No	Yes	Yes	Yes	No	2020-09-06	Yes	38ºC	No	No	No	Yes	Yes	Yes	Yes	No	No	No	Yes	No	No	No	No	No	Yes
	Masculino	Polícia militar	183 cm	100	Sanot detectedra das Graças de Souza	Yes	6918458914		Brasil				Parda	Paraná	Curitiba	Osório dos Santos Pacheco	205	Capão Raso		41998757319	stiveaugusto.m@gmail.com	No	No		No	Yes	Yes	Yes	Yes	2020-09-02	No	Nao	No	Yes	Yes	No	No	Yes	No	No	No	No	Yes	No	No	No	Yes	No informado	Yes
	Masculino	Regimento policia montada	188cm	105	Albertina klettenberg da silva	Yes	5089143960		Brasil				Branca	Paraná	Colombo					997596094	anot detectedre.ls84@yahoo.com.br	No	No		No	Yes	No	Yes	No	2020-09-05	No		No	No	No	Yes	Yes	Yes	No	No	No	No	No	No	No	No	No	No informado	Yes
	Masculino	PMPR	169	72	Luzia Arents de melo	Yes	941692922		Brasileiro	São José dos pinhais			Branca	Paraná	São José dos Pinhais					41998435572	Efer_10@yahoo.com.br	No	No		No	Yes	No	Yes	Yes	2020-09-02	No		No	No	No	No	No	Yes	No	No	No	No	Yes	No	No	No	No	No	No
	Feminino	Hospital do idoso	160	70	Francisca do Espírito Santo Alves	Yes	2261615957		Brasil	Curitiba			Branca	PR	Curitiba	Rua professora ana de oliveira viana	327	Fanny	81030200	41984051207	v.francisco.silva.va@gmail.com	No	No		No	Yes	Yes	Yes	Yes	2020-09-05	Yes	39.9	No	No	Yes	Yes	Yes	Yes	No	Yes	No	No	Yes	No	Yes	No	No	No informado	Yes
	Masculino	Metálugica Guild	170cm	82	Elizete Aparecida Oliva	Yes	5445903923		Brasil				Parda	Paraná	Curitiba					41991172923	geovane.oliva@hotmail.com	No	No		No	No	No	Yes	No	2020-09-09	Yes	37.5	No	No	No	No	Yes	No	Yes	No	Yes	Yes	No	No	No	No	No	No	No
	Feminino	Hospital Angelina Caron	169	64	Rita franz	Yes	6602379976		Brasil				Preta	Paraná	Curitiba	Rui Barbosa	902	Centro	80010030	97043386	Sara1producao@gmail.com	No	No		No	Yes	Yes	Yes	No	00/00/00	No		No	No	No	No	No	Yes	Yes	No	No	No	No	No	No	No	No	No	No
	Masculino	Pmpr 22 bpm 1 cia Colombo	175	100	Águeda Silva Santos	Yes	62695185120		Braril	Colombo	Nao		Branca	Pr	Colombo	Wenceslau braz	68	Paloma	83410u40	41988804270	Joarezki@hotmail.com	No	No		No	Yes	Yes	Yes	Yes	2020-09-15	Yes	38	Yes	Yes	No	Yes	Yes	Yes	Yes	Yes	Yes	Yes	No	No	Yes	No	No	No	Yes
	Masculino	Pmpr	180	80	Antônia bento da Silva da costa	Yes	5217485930		Brasil	Brasil			Parda	PR	Curitiba	Rua padre Paulo warkocZ	670	Cidade inot detectedustrial	81240-200	996476733	herculesrcosta@gmail.com	No	No		No	No	No	Yes	No	2020-09-16	Yes	38	Yes	No	No	Yes	Yes	No	Yes	No	No	No	Yes	No	Yes	No	No	No informado	Yes
	Feminino	02RS metropolitana	165	73	Maria Aparecida Colombo	Yes	5662661995		Brasil	Curitiba			Branca	Paraná	Curitiba	Avenida São José	700	Cristo Rei	80050350	41999118311	brunacolombo@ufpr.br	No	No		No	No	No	No	Yes	2020-09-16	No		Yes	Yes	No	Yes	Yes	Yes	Yes	No	No	No	Yes	No	Yes	No	No	No	Yes
	Feminino	cas	0	0	lurdes sales da silva	Yes	87254956900		Brasil	Curitiba	Yes	0	Parda	parana	curitiba	Rua joilson marcos alves	41	alto boqueirao	31770500	0	nao	No	No	Idade gestacional Ignorada	No	No	No	No	Yes	0	No	36	Yes	Yes	No	Yes	Yes	Yes	Yes	No	No	No	No	Yes	Yes	Yes	Yes	No informado	Yes
	Masculino	aa	333	444	GILDA PEREIRA FELIX	Yes	2940960941		brasil				Ignorado	pr	curitiba	Rua Almirante Tamanot detectedaré	1586	Juveve	80.040-110	41984192923	a@	No	No		No	No	No	No	No	2020-09-13	Yes		No	Yes	No	No	Yes	Yes	Yes	No	No	No	No	No	No	No	No	No	Yes
	Feminino	Polícia Científica - Instituto de Criminalistica	168	58	Heidi Liedtke Kolb	Yes	41840993863		Brasil				Branca	PR	Curitiba			Jardim das Américas		43991058880	kathleenliedtkekolb@gmail.com	No	No		No	No	No	No	No	2020-09-15	Yes	38.6	No	No	No	No	No	Yes	No	No	No	No	No	No	No	No	No	No informado	No
	Masculino	aa	444	444	JOSE ALEXAnot detectedRE DE MELLO	Yes	73136689968		brasil				Ignorado	pr	curitiba					41988626638	aa@	No	No		No	No	No	No	No	2020-09-11	No		No	Yes	No	No	No	No	No	No	No	No	Yes	No	No	No	No	No	No
	Masculino	Curitiba	1.78	92	Marilene Semmer	Yes	92233007972		brasil				Branca	parana	curitiba	cel jose carvalho de oliveira	1026	Uberaba	81570-160	41984395066	phsemmer@gmail.com	No	No		No	No	No	No	No	2020-09-16	No		No	Yes	No	No	Yes	No	Yes	No	No	No	No	No	No	No	No	No	No
	Masculino	COPOM	177cm	77	Eva Alves da Costa	Yes	1672187940		Brasil	Araucaria	Nao tem		Branca	Parana	Araucaria	Rua Begonia	774	Campina da Barra	83709320	41991771918	edsonasor@hotmail.com	No	No		No	No	No	No	No	2020-09-15	No		No	Yes	Yes	No	No	No	No	No	No	No	No	No	No	No	No	No informado	No
	Feminino	do lar	1.60	90	patricia	Yes	3835644920		Brasil	Curitiba	nao	0	Branca	parana	curitiba	Rua maestro carlos franqui	1460	boqueirão	81750400	41988496956	nao	No	No	Idade gestacional Ignorada	No	Yes	No	No	No	15 09 2020	No	36.5	No	No	No	Yes	Yes	Yes	Yes	No	No	No	Yes	No	No	No	No	No	No
	Masculino	Polícia Civil	1.9	110	MARIA SOCORRO PAIVA FERMON	Yes	53948149372		Brasil	Curitiba			Branca	Paraná	Curitiba					41998306263	allenpfermon@yahoo.com	No	No		Yes	No	No	Yes	Yes	2020-09-17	No		Yes	Yes	No	Yes	Yes	No	Yes	No	Yes	Yes	No	No	No	No	No	No	No
	Masculino	Secretaria de Segurança / PMPR	177	88	elisabeth manot detectedolini barone bueno menot detectedes	Yes	3296175911		Brasil	Curitiba			Branca	Paraná	Curitiba	Rua prof. Nuno de Souza e Silva	338	Santo Inácio	82010420	41998256940	jaidembbm@gmail.com	No	No		No	Yes	Yes	No	No	00/00/00	No		No	No	No	No	No	No	No	No	No	No	No	No	No	No	No	No	No
	Masculino	aa	333	333	BENEDITA DOS SANTOS CASTRO	Yes	45593485291		brasil				Ignorado	pr	curitiba					41997150980	aa@	No	No		No	No	No	No	No	2020-09-18	No		No	No	No	No	No	No	No	No	No	No	No	No	No	No	No	No	No
	Feminino	Hospital infantil Waldemar monastier	163	65	Sirlei Aparecida Santos de Marchi	Yes	3820490981		Brasil	Colombo	No positivesuo		Branca	Paraná	Colombo	Rua Anot detectedré Woss	119	São Gabriel	83404720	41996655769	elizabetedemarchi@hotmail.com	No	No	Idade gestacional Ignorada	No	No	No	Yes	Yes	2020-09-18	Yes	38.3	No	No	No	Yes	No	Yes	No	Yes	No	No	No	Yes	Yes	No	No	No informado	Yes
	Masculino	COMPLEXO MÉDICO PENAL	170	75	Rita Josefina Busato Guimarães	Yes	3844227997		BRASIL				Branca	Paraná	PINHAIS	Rua Rolânot detectedia	1351	Alto Tarumã	83325323	41984706865	phdbusato@hotmail.com	No	No		No	Yes	Yes	Yes	No	2020-09-06	Yes	38	No	No	No	Yes	No	No	No	Yes	No	No	Yes	No	Yes	No	No	No informado	Yes
	Masculino	Curitiba	175	78	Eloisa Helena de Souza	Yes	4199052941		Brasil	Curitiba			Parda	PR	Curitiba	Lauro Esmanhoto	134	Sta felicidade	82020275	999001841	vinicius_100@msn.com	No	No		Yes	Yes	Yes	Yes	Yes	2020-09-15	No		Yes	Yes	Yes	Yes	Yes	Yes	Yes	No	Yes	No	No	No	No	No	Yes	No	Yes
	Masculino	uti	162	85	ESTER Anot detectedREATTA SANTOS	Yes	5359219939		brasil				Ignorado	pr	curitiba					41996787135	aa@	No	No		No	Yes	Yes	No	No	2020-09-19	No		Yes	Yes	Yes	No	No	No	No	No	No	No	No	No	No	No	No	No	No
	Masculino	POLÍCIA MILITAR DO PARANÁ - BATALHÃO DE POLÍCIA DE GUARDA	172	82	MARIA DO CARMO FERREIRA DOS SANTOS	Yes	1669111946		BRASIL				Inot detectedígena	PARANÁ	CURITIBA	RUA DR BRONISLAU OSTOJA ROGUSKI	936	JARDIM DAS AMÉRICAS	81540080	41987248648	nelsonmauricio@pm.pr.gov.br	No	No		No	No	No	Yes	Yes	2020-09-20	Yes	39	Yes	No	No	Yes	Yes	Yes	Yes	No	Yes	Yes	No	No	Yes	No	No	No informado	Yes
	Feminino	UFPR/SESA PR	1.6	65	Rosa Santana da Conceição	Yes	42470059879		Brasil				Parda	PR	Curitiba	Rua Marechal Deodoro	1014	Centro	80060010	41992156212	Milena.sc94@gmail.com	No	No		No	Yes	Yes	Yes	Yes	2020-09-21	No		Yes	Yes	No	No	Yes	Yes	No	No	No	No	No	No	No	No	No	No	No
	Masculino	Secretaria de Estado da Segurança Pública	1.84	117	Valdevina Martins Rosa	Yes	13691329802		Brasil			706407139976287	Parda	Paraná	Araucária	Rua Siriema	1097	Capela Velha	83706-390	41996077197	carlos.rosa1720@gmail.com	No	No		No	Yes	Yes	No	No	2020-09-30	No		No	No	No	No	Yes	No	Yes	No	No	No	No	No	No	No	No	No informado	No
	Feminino	Secretaria de Estado da Segurança Pública	150 cm	55	Shirley Gonçalves de Araujo	Yes	4822024911		Brasil				Parda	Paraná	Araucária	Rua	1097	Capela Velha	83706390	999208557	catianaaraujo@sesp.pr.gov.br	No	No		No	No	Yes	No	No	00/00/00	No		No	No	No	No	No	No	No	No	No	No	No	No	No	No	No	No	No
	Feminino	BBTS TECNOLOGIA S.A	1.58	63	LOURDES DE MELLO APOLINARIO	Yes	550367918		BRASIL	CURITIBA			Branca	PR	CURITIBA					45991438728	alessanot detectedra.map27@hotmail.com	No	No		No	No	No	Yes	Yes	2020-08-17	No	37	No	Yes	No	Yes	Yes	Yes	Yes	No	No	No	No	Yes	Yes	No	No	No informado	Yes
	Feminino	Quartel da Polícia Militar do Paraná	165cm	88	Arlete Maria Quadros	Yes	8069519908		Brasil	Curitiba			Branca	Paraná	Curitiba	Rua João Batista Zagonel Passos	554	Xaxim	81830290	41992535354	amanot detecteda-pmpr@pm.pr.gov.br	No	No		No	Yes	Yes	Yes	Yes	2020-09-16	No		Yes	Yes	No	Yes	Yes	Yes	No	No	No	No	No	No	No	No	No	No informado	No
	Feminino	aa	555	555	TEREZA CILIAO LOURENCON	Yes	32407394968		brasil				Ignorado	pr	curitiba					41999492519	a@	No	No		No	No	No	No	No	2020-09-16	No		No	Yes	No	No	No	No	No	No	No	No	No	No	No	No	No	No	No
	Feminino	BTCC	156cm	70	Maria Regina Patrocinio de Souza	Yes	5156353916		Brasil				Parda	Paraná	Piraquara	Rua 25 de Março	971	Guarituba	83310270	41992665465	mooh.thaina96@gmail.com	No	No		No	Yes	Yes	Yes	Yes	2020-09-17	No		Yes	No	No	Yes	Yes	Yes	Yes	No	Yes	Yes	Yes	No	No	No	No	No	No
	Masculino	aa	333	333	MARIA APARECIDA DIAS DE PAULA	Yes	7158051935		brasil				Ignorado	pr	piraquara					41991076674	aa@	No	No		No	No	No	No	No	2020-08-17	No		Yes	No	No	No	No	No	No	No	No	No	No	No	No	No	No	No	No
	Masculino	Polícia militar	175	85	Sueli da Silva Vieira	Yes	563945940		Brasil	Saí José dos Pinhais			Parda	Paraná	São José dos Pinhais					41997077062	flamengoale@hotmail.com	No	No		No	No	No	Yes	Yes	19092020	Yes		No	No	No	Yes	No	Yes	No	No	No	No	Yes	No	Yes	No	No	No informado	No
	Masculino	aaaaaaaaaa	3.33	500	LInot detectedAMIR BAHNIUK	Yes	6688394901		BRASIL				Ignorado	PARANÁ	CURITIBA					996652761	XXXXXXXXXXXXXXXXXXXXXXXXXXXX	No	No		No	No	No	No	No	0	No		No	No	No	No	No	No	No	No	No	No	No	No	No	No	No	No informado	No
	Masculino	curitiba	1.78	80	soeli maria santos JANISZEWSKI	Yes	8102677900	Criança até 12 anos	Brasil	sao jose	nao	0	Parda	parana	sao jose	rua santa rima	196	cidade jardim	83035250	41995401556	douglasJANISZEWSKI3@gmail.com	No	No	Idade gestacional Ignorada	No	Yes	No	No	Yes	25 09 2020	Yes	37	Yes	No	No	No	Yes	Yes	No	No	No	No	No	No	No	No	No	No	No
	Masculino	Polícia Militar do Paraná	182cm	80	Marielza Pereira de Miranot detecteda Mazza	Yes	7372291950		Brasil	Curitiba	FX256625		Branca	Paraná	Curitiba	Paulo Setúbal	3110	Boqueirão	81670-130	41998991506	carlosmazza1@gmail.com	No	No		No	Yes	Yes	Yes	Yes	2020-08-07	Yes	38	Yes	Yes	No	Yes	No	Yes	No	No	Yes	Yes	No	No	No	No	No	No	Yes
	Feminino	PUCPR	154	52	Anot detectedrea Aparecida Rosa de Oliveira da Silva	Yes	11041813988		Brasil				Branca	PR	Curitiba	Rua jóquei clube	437	Prado velho	80215220	42998283033	Gaabi.silva@hotmail.com.br	No	No		No	No	No	Yes	No	00/00/00	No		No	No	No	Yes	No	No	No	No	No	No	No	No	No	No	No	No	No
	Feminino	Estudante	163	43	Marines Angela Redivo Stroher	Yes	8856821907		Brasil				Branca	Paraná	Curitiba					44999597918	g.stroher@hotmail.com	No	No		No	No	No	Yes	No	00/00/00	No		No	No	No	No	No	No	No	No	No	No	No	No	No	No	No	No	No
	Feminino	Pucpr	163	62	Carla Sony Sakr Khouri Fernanot detectedes	Yes	70330971158		Brasil				Branca	Paraná	Curitiba	Rua nilo Cairo	524	Centro	80060050	62992981670	dani.khouri@hotmail.com	No	No		No	No	No	No	No	0	No		No	No	No	No	No	Yes	No	No	No	No	No	No	No	No	No	No informado	No
	Masculino	policia militar	168	90	LILIANE CRISTINA CARDOSO DE SOUZA	Yes	8809516990		brasil				Ignorado	pr	curitiba	evaristo da viga	54			996307230	aa@	No	No		No	Yes	Yes	Yes	No	2020-09-19	No		No	Yes	No	No	No	Yes	No	No	No	No	No	No	No	No	No	No	No
	Masculino	POLICIA MILITAR	170	83	IONE BARBOSA DE LIMA	Yes	1501398962		BRASIL				Ignorado	PR	CURITIBA	CAPITAO BARCIMIO SICUPIRA	37	CIC	81.230-480	991157587	A@	No	No		No	No	No	No	No	2020-09-13	No		No	Yes	No	No	Yes	No	No	No	No	No	No	No	No	No	No	No	No
	Masculino	sesp	1.58	88	angela maria de oliveira costa	Yes	2589677901		Brasil	Curiba	nao	0	Branca	parana	curitiba	Rua presidente joao gullar	1495	tatuguara	81470470	41991245275	adri13@hotmail.com	No	No	Idade gestacional Ignorada	Yes	No	No	Yes	Yes	0	No	37.5	No	No	No	Yes	No	Yes	No	No	Yes	Yes	Yes	Yes	Yes	No	No	No	Yes
	Feminino	12° BPM	162	66	Maria Cristina grecco da costa	Yes	5982250996		Brasil				Branca	Paraná	Curitiba	Rua Buenos aires	1000	Agua verde	80250070	41996512290	jugrecco@hotmail.com	No	No		No	Yes	Yes	No	No	00/00/00	No		No	No	No	No	No	No	No	No	No	No	No	No	No	No	No	No informado	No
	Masculino	delegacia da mulher da xapital	191	93	Nadia Aparecida de Camargo Basilio	Yes	84234849987		Brasil	Curitiba			Branca	Paraná	Curitiba	Rua Alferes Poli	3715	Parolin	80220051	41999830181	Inv.rybasilio@pc.pr.gov.br	No	No		No	Yes	Yes	Yes	Yes	2020-09-14	No		Yes	No	No	Yes	No	Yes	No	Yes	No	No	Yes	Yes	No	No	No	No informado	Yes
	Feminino	aa	999	999	CLEUZA FERNAnot detectedES DE SOUZA	Yes	97415090900		brasil				Ignorado	pr	curitiba	ponte serrada	42	sao braz	82.015-300	41992092726	aa@	No	No		No	No	No	No	No	2020-09-14	No		No	Yes	No	No	No	No	No	No	No	No	No	No	No	No	No	No	No
	Feminino	aa	999	999	Anot detectedREA WRUBEL KONIG	Yes	6530679928		brasil				Ignorado	pr	pinhais	Rua Vereador Antônio Romeu Yesoni	316	Jardim Amélia	83.330-210	41999822208	aa@	No	No		No	No	No	No	No	2020-09-15	No		No	Yes	No	No	No	No	No	No	No	No	No	No	No	No	No	No	No
	Feminino	Delegacia	168	58	TERESINHA DE SANCTIS NEUMANN	Yes	3493771975		brasil				Ignorado	pr	curitiba					41996928777	aa@	No	No		No	No	No	No	No	2020-09-13	No		Yes	No	No	No	No	No	No	No	No	No	No	No	No	No	No	No	No
	Masculino	Curitiba	183	95	Margarida Maria Variani Zanot detectedona	Yes	5254355905		Brasil				Branca	Pr	Curitiba	Rua buenos aires	1000	Agua verde		41991721902	Ro1zanot detectedona@gmail.com	No	No		No	Yes	Yes	No	Yes	2020-09-12	No		Yes	No	No	No	Yes	Yes	Yes	No	No	No	No	No	No	No	No	No informado	No
	Feminino	Feas - Hospital Zilda Arns	160	57	Ionice de Oliveira Vargas	Yes	30186841841		Brasil				Branca	Paraná	Curitiba					41999366026	adri.adri.v@gmail.com	No	No		No	No	No	Yes	Yes	2020-09-15	No		No	No	No	No	Yes	Yes	No	No	No	No	No	No	No	No	No	No	No
	Masculino	Delegacia da Mulher de Curitiba	184cm	90	Rosivete Massuchetto Botega	Yes	3034117914		Brazil	Brazil			Branca	PR	Curitiba	Rua Duque de Caxias	330	São Francisco	82530200	41999776686	sergioffernanot detectedo@gmail.com	No	No		No	Yes	Yes	Yes	Yes	2020-09-15	No		No	Yes	No	No	Yes	No	No	No	No	No	No	No	No	No	No	No informado	No
	Masculino	Corpo de Bombeiros	186	98	Maria Juracy Machado	Yes	4962572938		Brasil				Branca	PR	Colombo					41996169154	jackson_27x@hotmail.com	No	No		No	No	No	No	Yes	2020-09-15	No		No	Yes	No	Yes	Yes	Yes	Yes	No	No	No	No	No	Yes	No	No	No informado	Yes
	Masculino	0	0	0	RENETA BRUSTOLIN IPLINSKI	Yes	4149315990		BRASIL	CURITIBA			Branca	PARANÁ	CURITIBA					999997215	0	No	No		No	Yes	Yes	No	No	0	No		No	No	No	No	No	No	No	No	No	No	No	No	No	No	No	No informado	No
	Masculino	Polícia Militar	175	72	Antonia	Yes	6838826941	Em situação de rua	Brasil	Curitiba			Branca	Paraná	Curitiba					41999571548	Netogs10@gmail.com	No	No		Yes	No	No	No	Yes	2020-08-04	Yes	37	No	No	No	Yes	Yes	Yes	Yes	No	No	No	No	No	Yes	No	No	No informado	Yes
	Feminino	Panificadora Mottin e Monterosso ltda	1.6	58	Ilá Garcia Monterosso	Yes	91305381904		Brasil				Branca	Pr	Curitiba	Rua tapakos	441	Mercês	80510330	41996439056	Fernanot detecteda.monterosso@gmail.com	No	No		No	No	No	No	No	2020-09-10	No		No	No	No	No	No	No	No	No	No	No	Yes	No	No	No	No	No	No
	Masculino	Colônia penal Agroinot detectedustrial Paraná	178	80	Elza Maria Mota	Yes	3798471916		Brasil	Piraquara			Branca	Paraná	Piraquara					991021231	fabiomota07@hotmail.com	No	No		No	Yes	Yes	No	Yes	7	No		No	Yes	No	No	No	Yes	Yes	No	No	No	No	No	No	No	No	No informado	No
	Feminino	aa	1.65	66	IRENE RADATZ	Yes	2842613945		brasil				Ignorado	PR	CURITIBA	RUA JUnot detectedIAI DO SUL	1011	SITIO CERCADO	81.935-040	41984957529	AA@	No	No		No	No	No	No	No	2020-09-05	No		No	No	No	No	No	No	No	No	No	No	No	No	No	No	No	No	No
	Masculino	PMPR	170	83	dilma aparecida polli lazarotto	Yes	6410131917		brasil	colombo			Branca	Paraná	colombo	rua copernico	258	campo alto	83408060	984124829	adrianolazarotto@gmail.com	No	No		No	No	No	No	Yes	No me recordo	Yes	37.5	Yes	Yes	No	Yes	Yes	Yes	Yes	No	Yes	No	Yes	No	No	No	No	No informado	No
	Feminino	aa	333	333	ELITA BOMBARDELLI GOMIG	Yes	6980351940		brasil				Ignorado	PR	COLOMBO					984333752	A@	No	No		No	No	No	No	No	2020-09-09	No		Yes	No	No	No	No	No	No	No	No	No	No	No	No	No	No	No	No
	Masculino	ELETRICISTA	185	55	ROSELI PENHA DE LIMA	Yes	4861806976		BRASIL				Ignorado	PR	CURITIBA					991157587	AA@	No	No		No	No	No	No	No	2020-09-18	Yes		No	No	Yes	Yes	No	No	No	No	No	No	No	No	No	No	No	No	No
	Masculino	Corpo de Bombeiros Militar do Paraná	187	87	Nayr Ruggini	Yes	3610605995		Brasil	Curitiba			Branca	PR	Curitiba	Rua Cid Marconot detectedes de Albuquerque	1116	pinheirinho	81820000	992328060	marcosruggini@hotmail.com	No	No		No	No	No	No	No	setembro	No		No	Yes	No	Yes	No	Yes	No	No	No	Yes	No	No	Yes	No	No	No	No
	Feminino	DO LAR	174	85	MARIA APARECIDA Anot detectedRIAN PENHA	Yes	97872008904		BRASIL				Ignorado	PR	CURITIBA					991748557	A@	No	No		No	No	No	No	No	2020-09-18	Yes		No	No	Yes	No	No	No	No	No	No	No	No	No	No	No	No	No	No
	Masculino	Complexo médico penal	176cm	85	Fausta pereira de oliveira	Yes	74759140972		Brasil	Quatro Barras	No		Parda	Parana	Quatro Barras	Casa	46	Borda do campo	83425-000	997719395	claudinei44oliveira@hotmail.com	No	No		No	Yes	Yes	Yes	Yes	2020-09-15	Yes	38	No	No	Yes	Yes	Yes	Yes	Yes	No	Yes	Yes	Yes	Yes	Yes	No	No	No informado	Yes
	Masculino	Corpo de Bombeiros	184	93	Valquíria Steenbock	Yes	4602697984		Brasil				Branca	Parana	Fazenot detecteda Rio Granot detectede	Rua irere	350	Gralha Azul	83824-205	41997085578	mozartbm@hotmail.com	No	No		No	Yes	No	No	Yes	2020-08-19	No		Yes	No	No	Yes	Yes	No	No	No	No	No	Yes	No	No	No	No	No informado	Yes
	Masculino	5 B Sup	1.69	80	Iraci Ferreira de Freitas	Yes	82177805104		Brasil	Curitiba			Parda	PR	Curitiba	Silva Jardim	110	Rebouças	80230000	41992437511	Antonioflavio07@Gmail.com	No	No		No	No	No	No	No	00/00/00	No		No	No	No	No	No	No	No	No	No	No	No	No	No	No	No	No	No
	Masculino	apositiveentado	1.67	90	Iracema da Costa Ferreira	Yes	55331076904		Brasil				Branca	Paraná	Curitiba					41995601000	majorcostapr@hotmail.com	No	No		Yes	No	No	No	No	0	No		No	No	No	No	No	No	No	No	No	No	No	No	No	No	No	No informado	No
	Feminino	aa	333	333	ELOINA GURA	No	1694892999		BRASIL				Ignorado	PR	CURITIBA					41995991743	AA@	No	No		No	No	No	No	No	2020-09-12	No		No	No	No	No	No	No	No	No	No	No	No	No	No	No	No	No	No
	Masculino	Autônomo	1.8	93	Iclea Aparecida Rodrigues WERPACHOWSKI	Yes	97309095120		Brasil	Curitiba			Branca	Paraná	Curitba					41996807447	tcasuo9@gmail.com	No	No		Yes	No	No	Yes	Yes	2020-09-14	No		Yes	Yes	No	Yes	Yes	Yes	No	No	No	No	No	No	No	No	No	No	No
	Masculino	aa	333	333	DALNICE DO ROCIO ALBUQUERQUE	Yes	4840257914		brasil				Ignorado	pr	curitiba					41996650158	aa@	No	No		No	No	No	No	No	2020-09-09	No		Yes	No	Yes	No	Yes	No	No	No	No	No	No	No	No	No	No	No	No
	Feminino	Do lar	171	65	Lilian Boska do Amaral	Yes	5303104907		Brasil				Branca	Parana	Curitiba					41988837575	lucianaboska@yahoo.com.br	No	No		No	Yes	No	Yes	Yes	2020-09-09	Yes		Yes	Yes	Yes	Yes	Yes	Yes	Yes	No	Yes	Yes	Yes	No	No	No	No	No	Yes
	Masculino	22° BPM / 4 CIA	182	78	JANETE BIORA SCARAMELLA	Yes	6092743922		BRASIL				Branca	PARANÁ	BOCAIUVA DO SUL	RUA ORLAnot detectedO UBALDINO CARON	106	VILA BOQUEIRAO	83450000	41999600062	bioraaaaa@gmail.com	No	No		No	No	No	No	Yes	2020-09-10	Yes	39	Yes	No	No	No	Yes	No	Yes	No	Yes	Yes	No	No	Yes	No	No	No	Yes
	Masculino	Policia Militar	169	75	Ruth Noemi de Souza Machado da Rocha	Yes	3490057961		Brasil	Curitiba	Nao		Branca	Parana	Curitiba	Rua Antônio Calheiro Rodrigues	177	Uberaba	81560580	41992065216	rich_rocha@hotmail.com	No	No	Idade gestacional Ignorada	No	Yes	Yes	Yes	Yes	2020-09-14	Yes	36	Yes	Yes	Yes	Yes	Yes	Yes	No	No	Yes	No	Yes	No	Yes	No	Yes	No	Yes
	Masculino	Delta sistemas de segurança	181	92	Florinot detecteda Branot detected woytovicz	Yes	58751637987		Brasil	Brasil			Branca	PR	Curitiba	William Booth	1432	Boqueirão	81730-08	41985044940	lucio.woyt@gmail.com	No	No		No	Yes	Yes	Yes	Yes	2020-09-03	No		Yes	Yes	No	No	No	No	No	No	No	No	No	No	No	No	No	No informado	No
	Masculino	Policial militar	178cm	95	Regina zelia de souza	Yes	97571903904		Brasil				Preta	PR	Sao jose dos pinhais	Frei basilio roewer	33	Guatupê	83065-450	41996757834	dsouzao@hotmail.com	No	No		No	Yes	Yes	Yes	Yes	2020-07-03	No		No	No	No	Yes	Yes	No	No	No	Yes	No	No	No	No	No	No	No informado	Yes
[truncated: 33 more columns]

## Sheet: Excluded samples
RT-PCR SARS-CoV-2 results	TERA results	Other viruses infection
not detected	underaged
not detected	underaged
not detected	underaged
not detected	underaged
not detected	underaged
not detected	underaged
not detected	underaged
not detected	underaged	Adenovirus
not detected	underaged
not detected	underaged
not detected	underaged	Rhinovirus
not detected
not detected
missing information
missing information
not detected
not detected
missing information
missing information
missing information
not detected
not detected
missing information
not detected	underaged
not detected	underaged
